# Supplementary material for: Polyphenylglyoxamide-Based Amphiphilic Small Molecular Peptidomimetics as Antibacterial Agents with Anti-Biofilm Activity
Source: MDPI journal article supplement (doi:10.3390/ijms22147344), 2021-07-08

# Polyphenylglyoxamide-based Amphiphilic Small Molecular Peptidomimetics as Antibacterial Agents with Anti-biofilm Activity

Tsz Tin Yu <sup>1</sup>, Rajesh Kuppusamy <sup>1,2</sup>, Muhammad Yasir <sup>2</sup>, Md. Musfizur Hassan <sup>1</sup>, Manjulatha Sara <sup>2</sup>, Junming Ho <sup>1</sup>, Mark D.P. Willcox <sup>2</sup>, David StC. Black <sup>1,\*</sup> and Naresh Kumar <sup>1,\*</sup>

<sup>1</sup> School of Chemistry, The University of New South Wales, Sydney, NSW 2052, Australia

<sup>2</sup> School of Optometry and Vision Science, University of New South Wales, Sydney, NSW 2052, Australia

\* Correspondence: d.black@unsw.edu.au; n.kumar@unsw.edu.au

## Contents

|                                                                                                                       |    |
|-----------------------------------------------------------------------------------------------------------------------|----|
| <sup>1</sup> H NMR and <sup>13</sup> C NMR spectra of synthesised compounds.....                                      | 5  |
| 5-Phenylindoline-2,3-dione (4) .....                                                                                  | 5  |
| 5-([1,1'-Biphenyl]-4-yl)indoline-2,3-dione (5) .....                                                                  | 5  |
| 5-([1,1'-Biphenyl]-4-yl)-1-(octylsulfonyl)indoline-2,3-dione (7d) .....                                               | 6  |
| 1-(Dodecylsulfonyl)indoline-2,3-dione (8a).....                                                                       | 7  |
| 5-Bromo-1-(dodecylsulfonyl)indoline-2,3-dione (8b).....                                                               | 8  |
| 1-(Dodecylsulfonyl)-5-phenylindoline-2,3-dione (8c) .....                                                             | 9  |
| 5-([1,1'-Biphenyl]-4-yl)-1-(dodecylsulfonyl)indoline-2,3-dione (8d).....                                              | 10 |
| 1-(Hexadecylsulfonyl)indoline-2,3-dione (9a) .....                                                                    | 11 |
| 5-Bromo-1-(hexadecylsulfonyl)indoline-2,3-dione (9b) .....                                                            | 12 |
| 1-(Hexadecylsulfonyl)-5-phenylindoline-2,3-dione (9c).....                                                            | 13 |
| <i>N</i> -(3-(Dimethylamino)propyl)-2-(4-(octylsulfonamido)-[1,1':4',1''-terphenyl]-3-yl)-2-oxoacetamide (10d).....   | 14 |
| <i>N</i> -(3-(Dimethylamino)propyl)-2-(2-(dodecylsulfonamido)phenyl)-2-oxoacetamide (11a).....                        | 15 |
| 2-(5-Bromo-2-(dodecylsulfonamido)phenyl)- <i>N</i> -(3-(dimethylamino)propyl)-2-oxoacetamide (11b) .....              | 16 |
| <i>N</i> -(3-(Dimethylamino)propyl)-2-(4-(dodecylsulfonamido)-[1,1'-biphenyl]-3-yl)-2-oxoacetamide (11c).....         | 17 |
| <i>N</i> -(3-(Dimethylamino)propyl)-2-(4-(dodecylsulfonamido)-[1,1':4',1''-terphenyl]-3-yl)-2-oxoacetamide (11d)..... | 18 |
| <i>N</i> -(3-(Dimethylamino)propyl)-2-(2-(hexadecylsulfonamido)phenyl)-2-oxoacetamide (12a).....                      | 19 |
| 2-(5-Bromo-2-(hexadecylsulfonamido)phenyl)- <i>N</i> -(3-(dimethylamino)propyl)-2-oxoacetamide (12b) .....            | 20 |
| <i>N</i> -(3-(Dimethylamino)propyl)-2-(4-(hexadecylsulfonamido)-[1,1'-biphenyl]-3-yl)-2-oxoacetamide (12c).....       | 21 |

|                                                                                                                                       |    |
|---------------------------------------------------------------------------------------------------------------------------------------|----|
| <i>N,N</i> -Dimethyl-3-(2-(4-(octylsulfonamido)-[1,1':4',1''-terphenyl]-3-yl)-2-oxoacetamido)propan-1-aminium chloride (13d).....     | 22 |
| 3-(2-(2-(Dodecylsulfonamido)phenyl)-2-oxoacetamido)- <i>N,N</i> -dimethylpropan-1-aminium chloride (14a).....                         | 23 |
| 3-(2-(5-Bromo-2-(dodecylsulfonamido)phenyl)-2-oxoacetamido)- <i>N,N</i> -dimethylpropan-1-aminium chloride (14b).....                 | 24 |
| 3-(2-(4-(Dodecylsulfonamido)-[1,1'-biphenyl]-3-yl)-2-oxoacetamido)- <i>N,N</i> -dimethylpropan-1-aminium chloride (14c).....          | 25 |
| 3-(2-(4-(Dodecylsulfonamido)-[1,1':4',1''-terphenyl]-3-yl)-2-oxoacetamido)- <i>N,N</i> -dimethylpropan-1-aminium chloride (14d).....  | 26 |
| 3-(2-(2-(Hexadecylsulfonamido)phenyl)-2-oxoacetamido)- <i>N,N</i> -dimethylpropan-1-aminium chloride (15a).....                       | 27 |
| 3-(2-(5-Bromo-2-(hexadecylsulfonamido)phenyl)-2-oxoacetamido)- <i>N,N</i> -dimethylpropan-1-aminium chloride (15b).....               | 28 |
| 3-(2-(4-(Hexadecylsulfonamido)-[1,1'-biphenyl]-3-yl)-2-oxoacetamido)- <i>N,N</i> -dimethylpropan-1-aminium chloride (15c).....        | 29 |
| <i>N,N,N</i> -Trimethyl-3-(2-(4-(octylsulfonamido)-[1,1':4',1''-terphenyl]-3-yl)-2-oxoacetamido)propan-1-aminium iodide (16d).....    | 30 |
| 3-(2-(2-(Dodecylsulfonamido)phenyl)-2-oxoacetamido)- <i>N,N,N</i> -trimethylpropan-1-aminium iodide (17a).....                        | 31 |
| 3-(2-(5-Bromo-2-(dodecylsulfonamido)phenyl)-2-oxoacetamido)- <i>N,N,N</i> -trimethylpropan-1-aminium iodide (17b).....                | 32 |
| 3-(2-(4-(Dodecylsulfonamido)-[1,1'-biphenyl]-3-yl)-2-oxoacetamido)- <i>N,N,N</i> -trimethylpropan-1-aminium iodide (17c).....         | 33 |
| 3-(2-(4-(Dodecylsulfonamido)-[1,1':4',1''-terphenyl]-3-yl)-2-oxoacetamido)- <i>N,N,N</i> -trimethylpropan-1-aminium iodide (17d)..... | 34 |
| 3-(2-(2-(Hexadecylsulfonamido)phenyl)-2-oxoacetamido)- <i>N,N,N</i> -trimethylpropan-1-aminium iodide (18a).....                      | 35 |
| 3-(2-(5-Bromo-2-(hexadecylsulfonamido)phenyl)-2-oxoacetamido)- <i>N,N,N</i> -trimethylpropan-1-aminium iodide (18b).....              | 36 |
| 3-(2-(4-(Hexadecylsulfonamido)-[1,1'-biphenyl]-3-yl)-2-oxoacetamido)- <i>N,N,N</i> -trimethylpropan-1-aminium iodide (18c).....       | 37 |
| 5-([1,1'-Biphenyl]-3-yl)indoline-2,3-dione (19).....                                                                                  | 38 |
| 5-([1,1'-Biphenyl]-3-yl)-1-(octylsulfonyl)indoline-2,3-dione (20).....                                                                | 39 |
| <i>N</i> -(3-(Dimethylamino)propyl)-2-(4-(octylsulfonamido)-[1,1':3',1''-terphenyl]-3-yl)-2-oxoacetamide (21).....                    | 40 |
| <i>N,N</i> -Dimethyl-3-(2-(4-(octylsulfonamido)-[1,1':3',1''-terphenyl]-3-yl)-2-oxoacetamido)propan-1-aminium chloride (22).....      | 41 |
| <i>N,N,N</i> -Trimethyl-3-(2-(4-(octylsulfonamido)-[1,1':3',1''-terphenyl]-3-yl)-2-oxoacetamido)propan-1-aminium iodide (23).....     | 42 |

|                                                                                                                                                                                                                                              |    |
|----------------------------------------------------------------------------------------------------------------------------------------------------------------------------------------------------------------------------------------------|----|
| <i>tert</i> -Butyl (3-(2-(4-(octylsulfonamido)-[1,1':4',1''-terphenyl]-3-yl)-2-oxoacetamido)propyl)carbamate (24d).....                                                                                                                      | 43 |
| <i>tert</i> -Butyl (3-(2-(2-(dodecylsulfonamido)phenyl)-2-oxoacetamido)propyl)carbamate (25a) .....                                                                                                                                          | 44 |
| <i>tert</i> -Butyl (3-(2-(5-bromo-2-(dodecylsulfonamido)phenyl)-2-oxoacetamido)propyl)carbamate (25b) .....                                                                                                                                  | 45 |
| <i>tert</i> -Butyl (3-(2-(4-(dodecylsulfonamido)-[1,1'-biphenyl]-3-yl)-2-oxoacetamido)propyl)carbamate (25c).....                                                                                                                            | 46 |
| <i>tert</i> -Butyl (3-(2-(2-(hexadecylsulfonamido)phenyl)-2-oxoacetamido)propyl)carbamate (26a) ....                                                                                                                                         | 47 |
| <i>tert</i> -Butyl (3-(2-(5-bromo-2-(hexadecylsulfonamido)phenyl)-2-oxoacetamido)propyl)carbamate (26b) .....                                                                                                                                | 48 |
| <i>tert</i> -Butyl (3-(2-(4-(hexadecylsulfonamido)-[1,1'-biphenyl]-3-yl)-2-oxoacetamido)propyl)carbamate (26c).....                                                                                                                          | 49 |
| <i>N</i> -(3-aminopropyl)-2-(4-(octylsulfonamido)-[1,1':4',1''-terphenyl]-3-yl)-2-oxoacetamide hydrochloride (27d).....                                                                                                                      | 50 |
| <i>N</i> -(3-Aminopropyl)-2-(2-(dodecylsulfonamido)phenyl)-2-oxoacetamide hydrochloride (28a)....                                                                                                                                            | 51 |
| <i>N</i> -(3-Aminopropyl)-2-(5-bromo-2-(dodecylsulfonamido)phenyl)-2-oxoacetamide hydrochloride (28b) .....                                                                                                                                  | 52 |
| <i>N</i> -(3-aminopropyl)-2-(4-(dodecylsulfonamido)-[1,1'-biphenyl]-3-yl)-2-oxoacetamide hydrochloride (28c).....                                                                                                                            | 53 |
| <i>N</i> -(3-Aminopropyl)-2-(2-(hexadecylsulfonamido)phenyl)-2-oxoacetamide hydrochloride (29a) 54                                                                                                                                           |    |
| <i>N</i> -(3-Aminopropyl)-2-(5-bromo-2-(hexadecylsulfonamido)phenyl)-2-oxoacetamide hydrochloride (29b).....                                                                                                                                 | 55 |
| <i>N</i> -(3-Aminopropyl)-2-(4-(hexadecylsulfonamido)-[1,1'-biphenyl]-3-yl)-2-oxoacetamide hydrochloride (29c).....                                                                                                                          | 56 |
| ( <i>E</i> )-1- <i>tert</i> -Butyl- <i>N</i> -( <i>N'</i> -(( <i>tert</i> -butyloxidanyl)carbonyl)- <i>N</i> -(3-(2-(4-(octylsulfonamido)-[1,1':4',1''-terphenyl]-3-yl)-2-oxoacetamido)propyl)carbamimidoyl)-1-oxidanecarboxamide (30d)..... | 57 |
| ( <i>E</i> )-1- <i>tert</i> -Butyl- <i>N</i> -( <i>N'</i> -(( <i>tert</i> -butyloxidanyl)carbonyl)- <i>N</i> -(3-(2-(2-(dodecylsulfonamido)phenyl)-2-oxoacetamido)propyl)carbamimidoyl)-1-oxidanecarboxamide (31a).....                      | 58 |
| ( <i>E</i> )-1- <i>tert</i> -Butyl- <i>N</i> -( <i>N'</i> -(( <i>tert</i> -butyloxidanyl)carbonyl)- <i>N</i> -(3-(2-(5-bromo-2-(dodecylsulfonamido)phenyl)-2-oxoacetamido)propyl)carbamimidoyl)-1-oxidanecarboxamide (31b).....              | 59 |
| ( <i>E</i> )-1- <i>tert</i> -Butyl- <i>N</i> -( <i>N'</i> -(( <i>tert</i> -butyloxidanyl)carbonyl)- <i>N</i> -(3-(2-(4-(dodecylsulfonamido)-[1,1'-biphenyl]-3-yl)-2-oxoacetamido)propyl)carbamimidoyl)-1-oxidanecarboxamide (31c) .....      | 60 |
| ( <i>E</i> )-1- <i>tert</i> -Butyl- <i>N</i> -( <i>N'</i> -(( <i>tert</i> -butyloxidanyl)carbonyl)- <i>N</i> -(3-(2-(2-(hexadecylsulfonamido)phenyl)-2-oxoacetamido)propyl)carbamimidoyl)-1-oxidanecarboxamide (32a) .....                   | 61 |
| ( <i>E</i> )-1- <i>tert</i> -Butyl- <i>N</i> -( <i>N'</i> -(( <i>tert</i> -butyloxidanyl)carbonyl)- <i>N</i> -(3-(2-(5-bromo-2-(hexadecylsulfonamido)phenyl)-2-oxoacetamido)propyl)carbamimidoyl)-1-oxidanecarboxamide (32b) .....           | 62 |
| ( <i>E</i> )-1- <i>tert</i> -Butyl- <i>N</i> -( <i>N'</i> -(( <i>tert</i> -butyloxidanyl)carbonyl)- <i>N</i> -(3-(2-(4-(hexadecylsulfonamido)-[1,1'-biphenyl]-3-yl)-2-oxoacetamido)propyl)carbamimidoyl)-1-oxidanecarboxamide (32c) .....    | 63 |

|                                                                                                                             |    |
|-----------------------------------------------------------------------------------------------------------------------------|----|
| <i>N</i> -(3-Guanidinopropyl)-2-(4-(octylsulfonamido)-[1,1':4',1''-terphenyl]-3-yl)-2-oxoacetamide hydrochloride (33d)..... | 64 |
| 2-(2-(Dodecylsulfonamido)phenyl)- <i>N</i> -(3-guanidinopropyl)-2-oxoacetamide hydrochloride (34a) .....                    | 65 |
| 2-(5-Bromo-2-(dodecylsulfonamido)phenyl)- <i>N</i> -(3-guanidinopropyl)-2-oxoacetamide hydrochloride (34b).....             | 66 |
| 2-(4-(Dodecylsulfonamido)-[1,1'-biphenyl]-3-yl)- <i>N</i> -(3-guanidinopropyl)-2-oxoacetamide hydrochloride (34c).....      | 67 |
| <i>N</i> -(3-Guanidinopropyl)-2-(2-(hexadecylsulfonamido)phenyl)-2-oxoacetamide hydrochloride (35a).....                    | 68 |
| 2-(5-Bromo-2-(hexadecylsulfonamido)phenyl)- <i>N</i> -(3-guanidinopropyl)-2-oxoacetamide hydrochloride (35b).....           | 69 |
| <i>N</i> -(3-Guanidinopropyl)-2-(4-(hexadecylsulfonamido)-[1,1'-biphenyl]-3-yl)-2-oxoacetamide hydrochloride (35c).....     | 70 |



# $^1\text{H}$ NMR and $^{13}\text{C}$ NMR spectra of synthesised compounds

## 5-Phenylindoline-2,3-dione (4)

$^1\text{H}$  NMR (400 MHz,  $\text{DMSO}-d_6$ ):

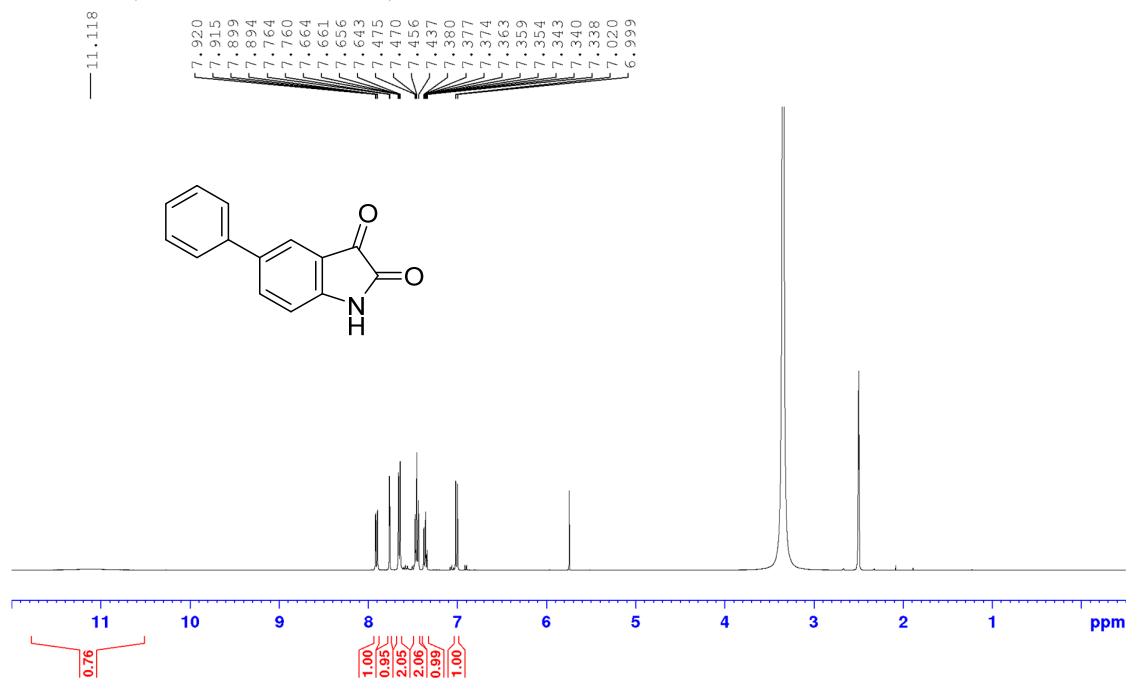

## 5-([1,1'-Biphenyl]-4-yl)indoline-2,3-dione (5)

$^1\text{H}$  NMR (400 MHz,  $\text{DMSO}-d_6$ ):

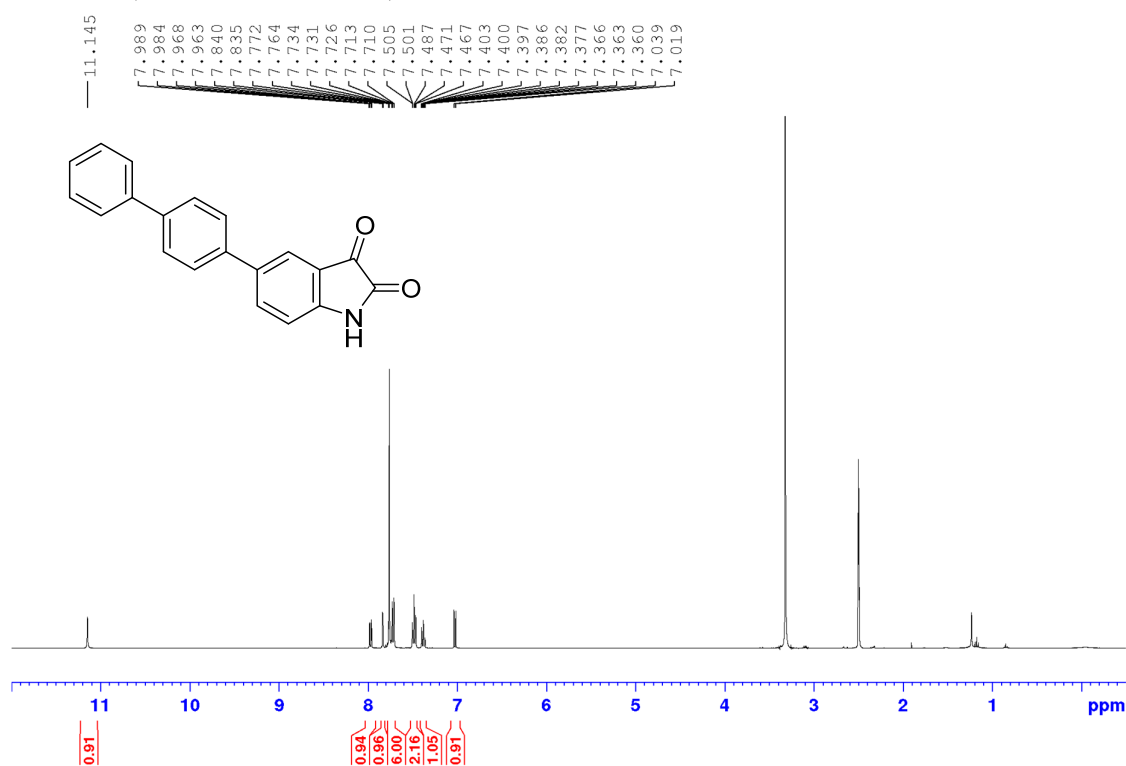

5-([1,1'-Biphenyl]-4-yl)-1-(octylsulfonyl)indoline-2,3-dione (**7d**)

$^1\text{H}$  NMR (400 MHz,  $\text{DMSO}-d_6$ ):

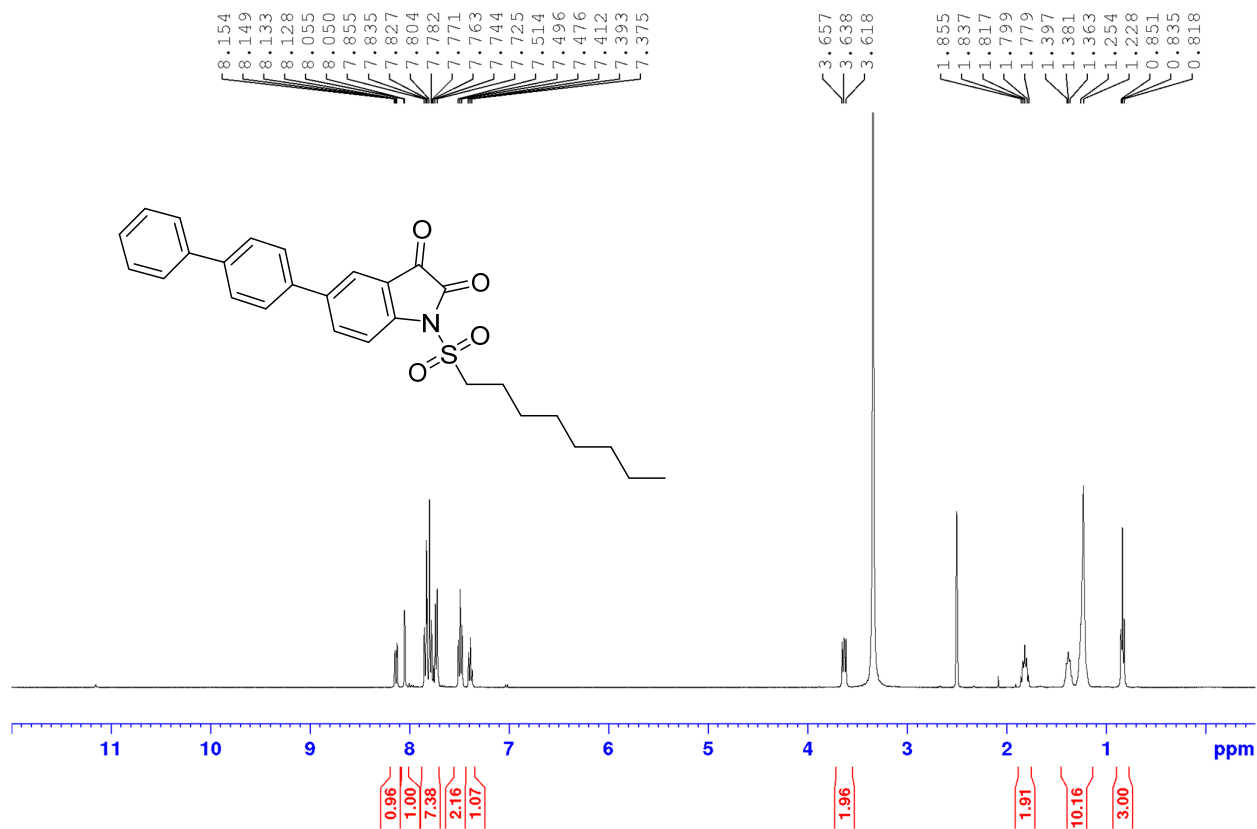

$^{13}\text{C}$  NMR (100 MHz,  $\text{DMSO}-d_6$ ):

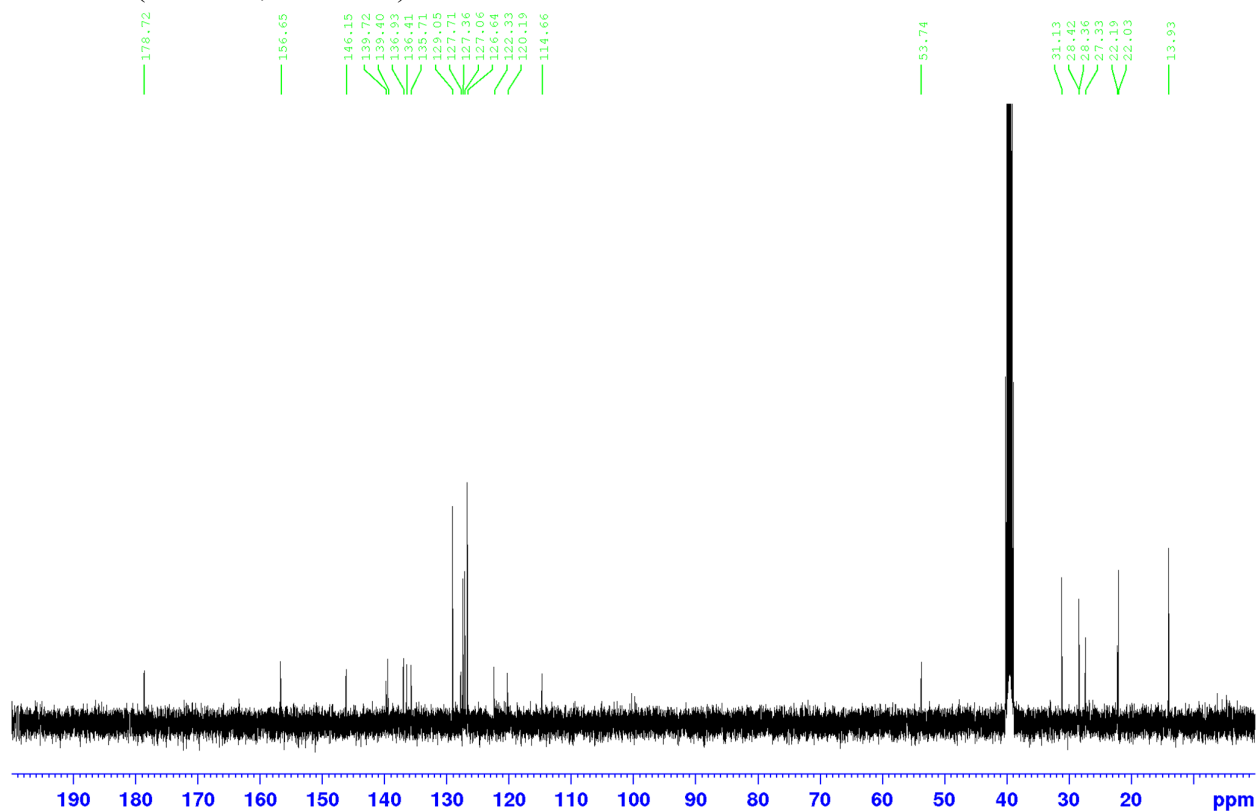

1-(Dodecylsulfonyl)indoline-2,3-dione (**8a**)

$^1\text{H}$  NMR (400 MHz,  $\text{DMSO}-d_6$ ):

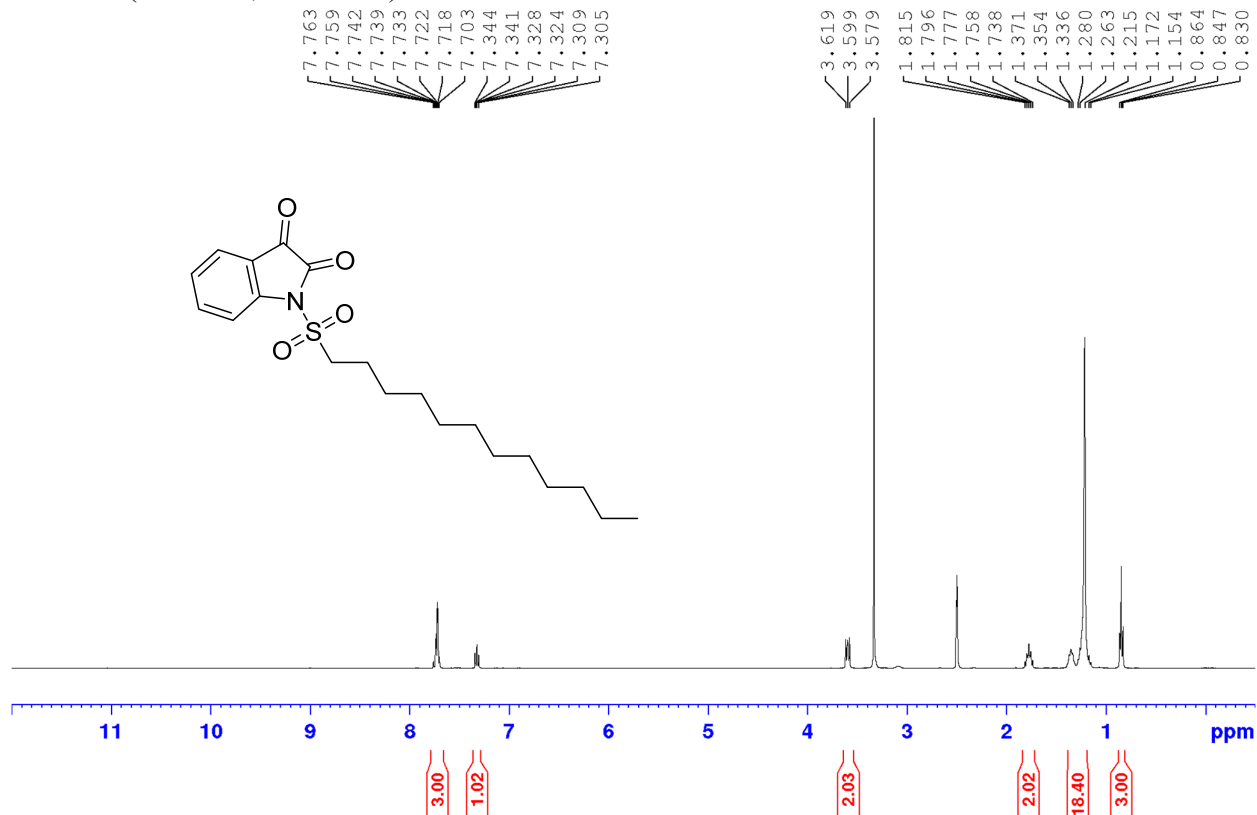

$^{13}\text{C}$  NMR (100 MHz,  $\text{DMSO}-d_6$ ):

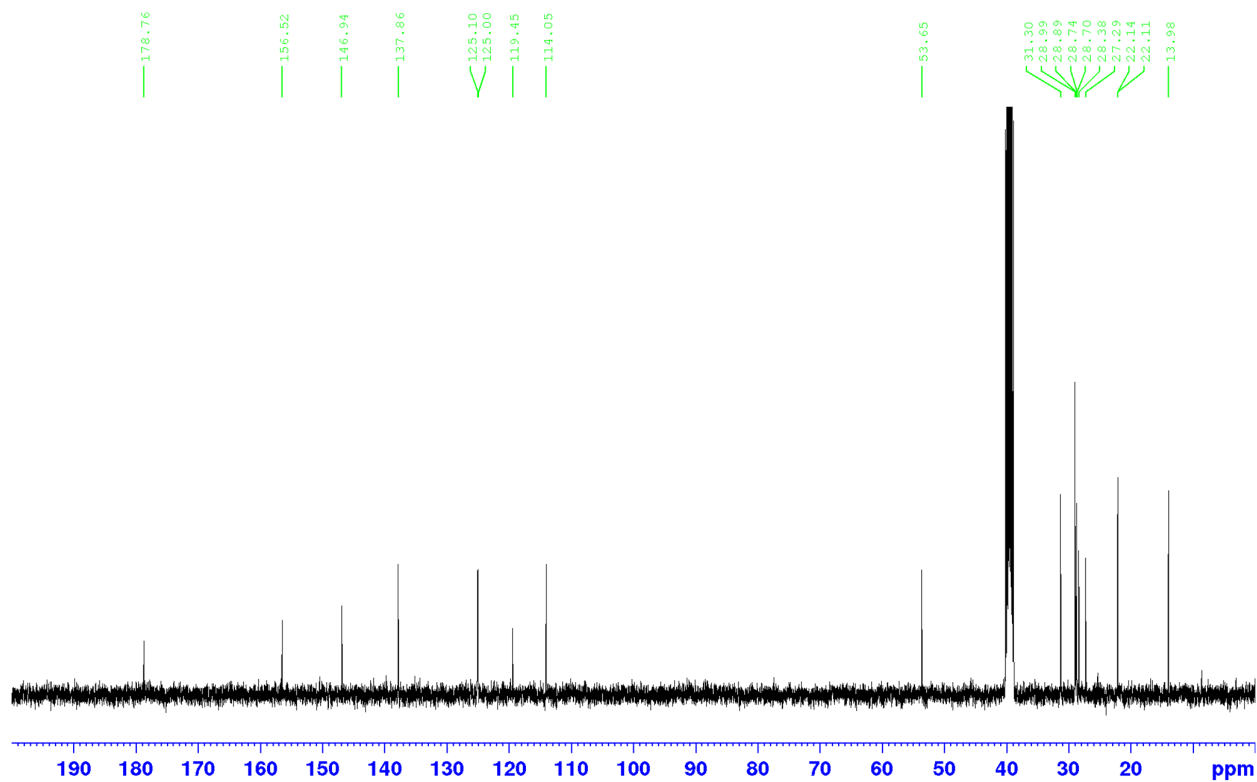

5-Bromo-1-(dodecylsulfonyl)indoline-2,3-dione (**8b**)

$^1\text{H}$  NMR (400 MHz,  $\text{DMSO}-d_6$ ):

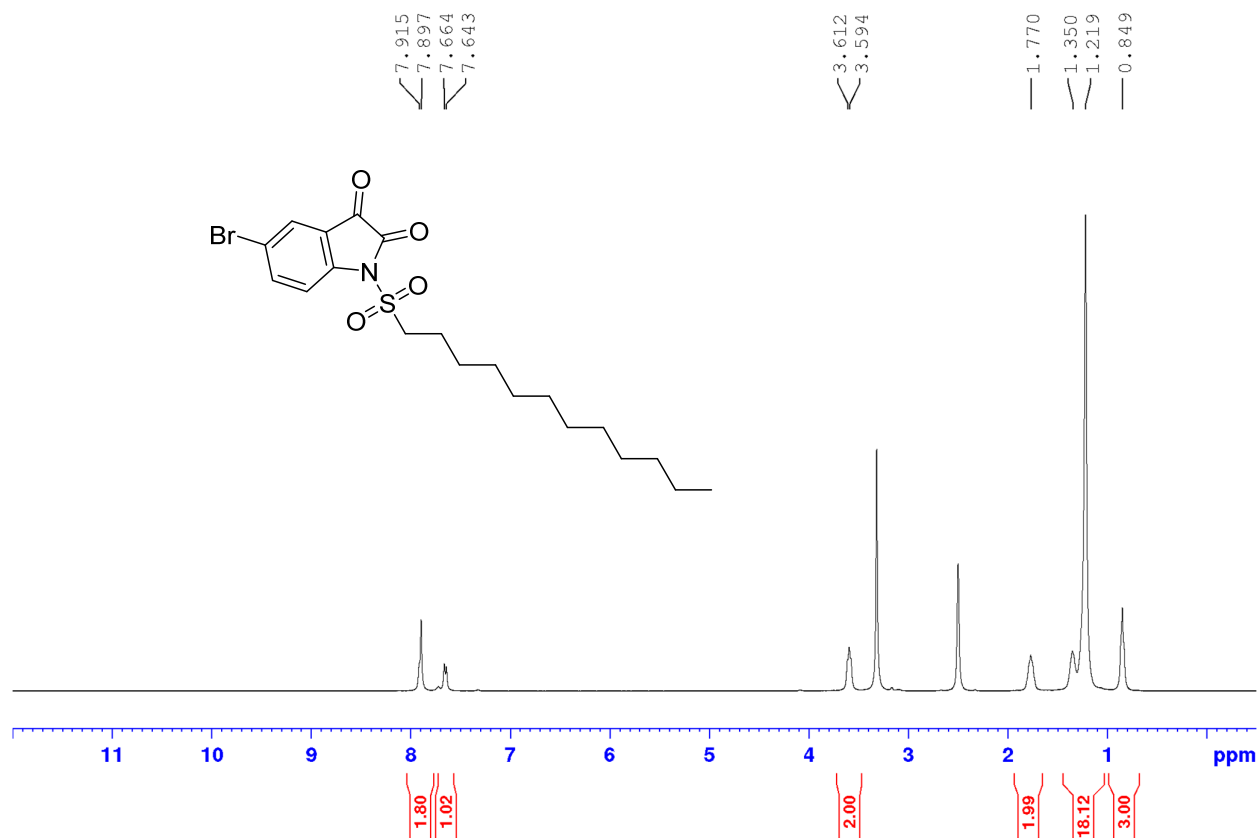

$^{13}\text{C}$  NMR (100 MHz,  $\text{DMSO}-d_6$ ):

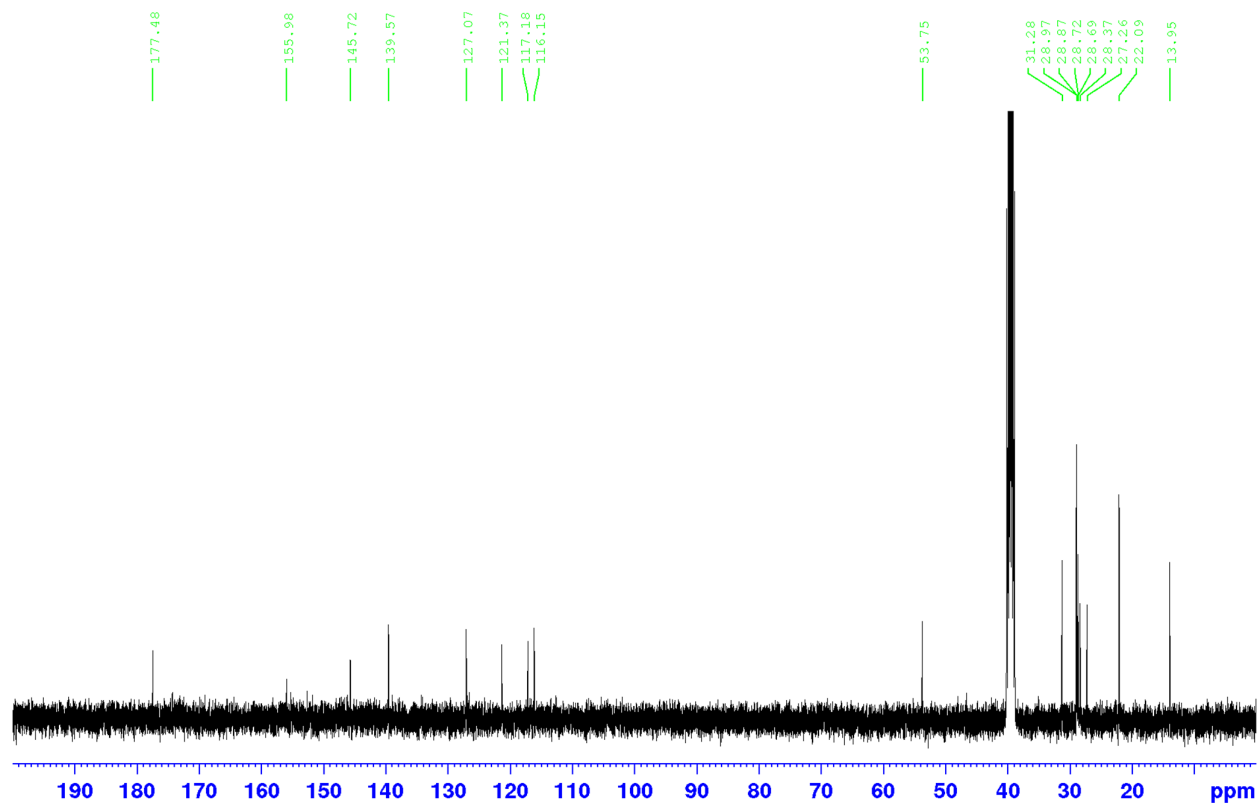

1-(Dodecylsulfonyl)-5-phenylindoline-2,3-dione (**8c**)

$^1\text{H}$  NMR (400 MHz,  $\text{DMSO}-d_6$ ):

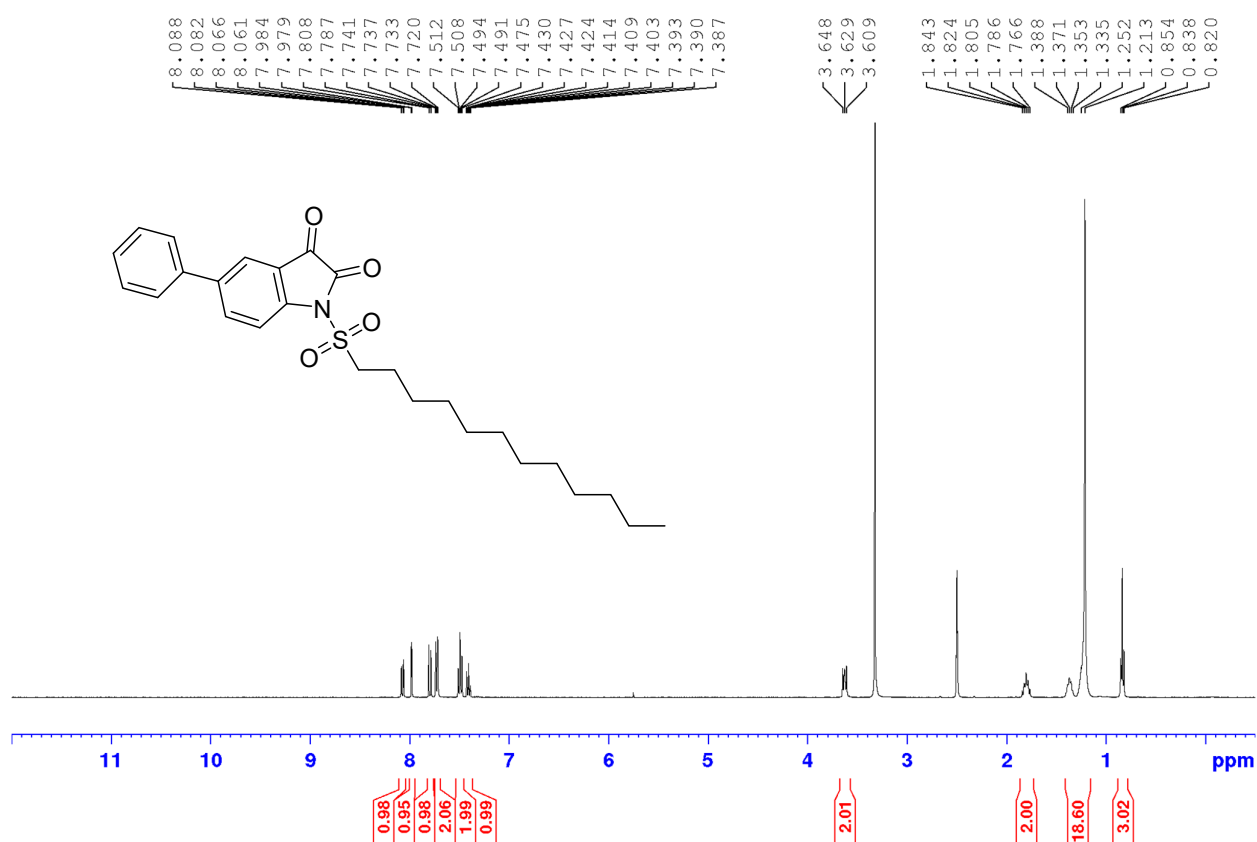

$^{13}\text{C}$  NMR (100 MHz,  $\text{DMSO}-d_6$ ):

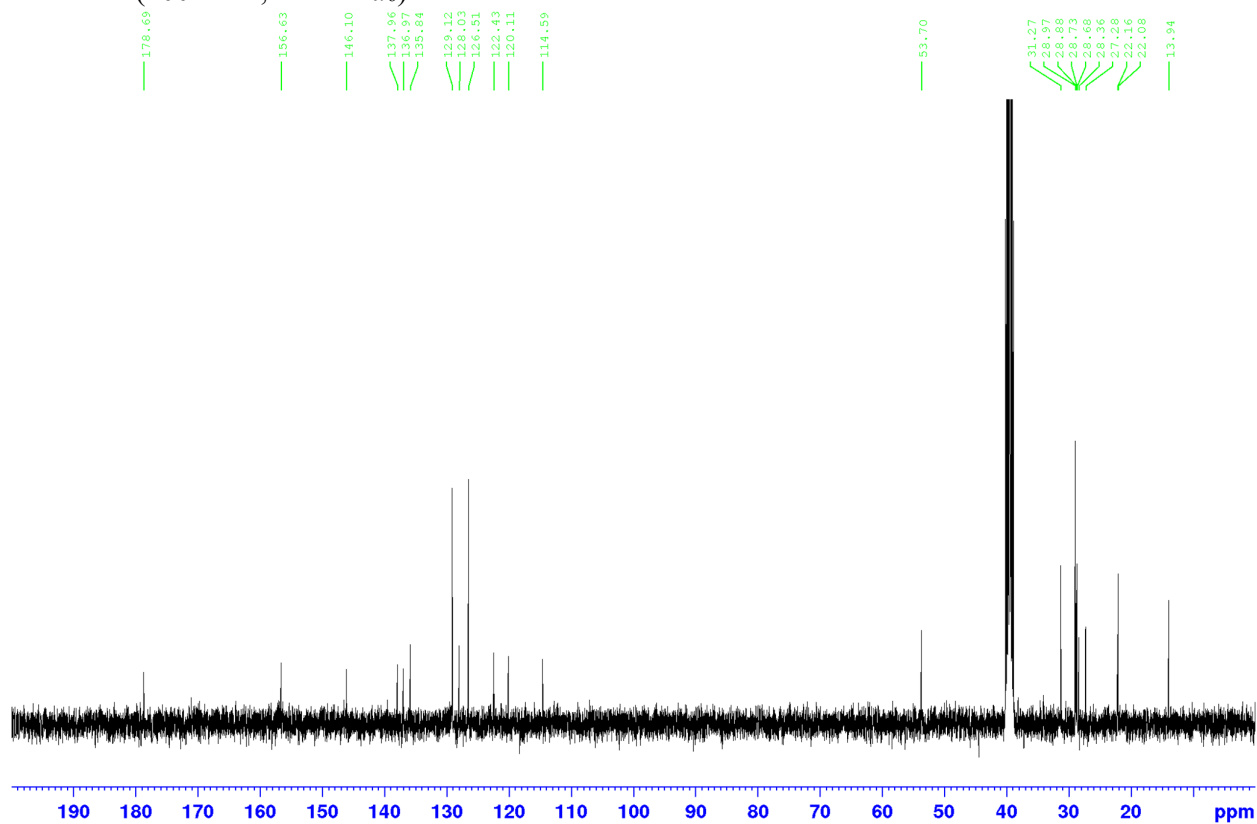

5-([1,1'-Biphenyl]-4-yl)-1-(dodecylsulfonyl)indoline-2,3-dione (**8d**)

$^1\text{H}$  NMR (600 MHz,  $\text{DMSO}-d_6$ ):

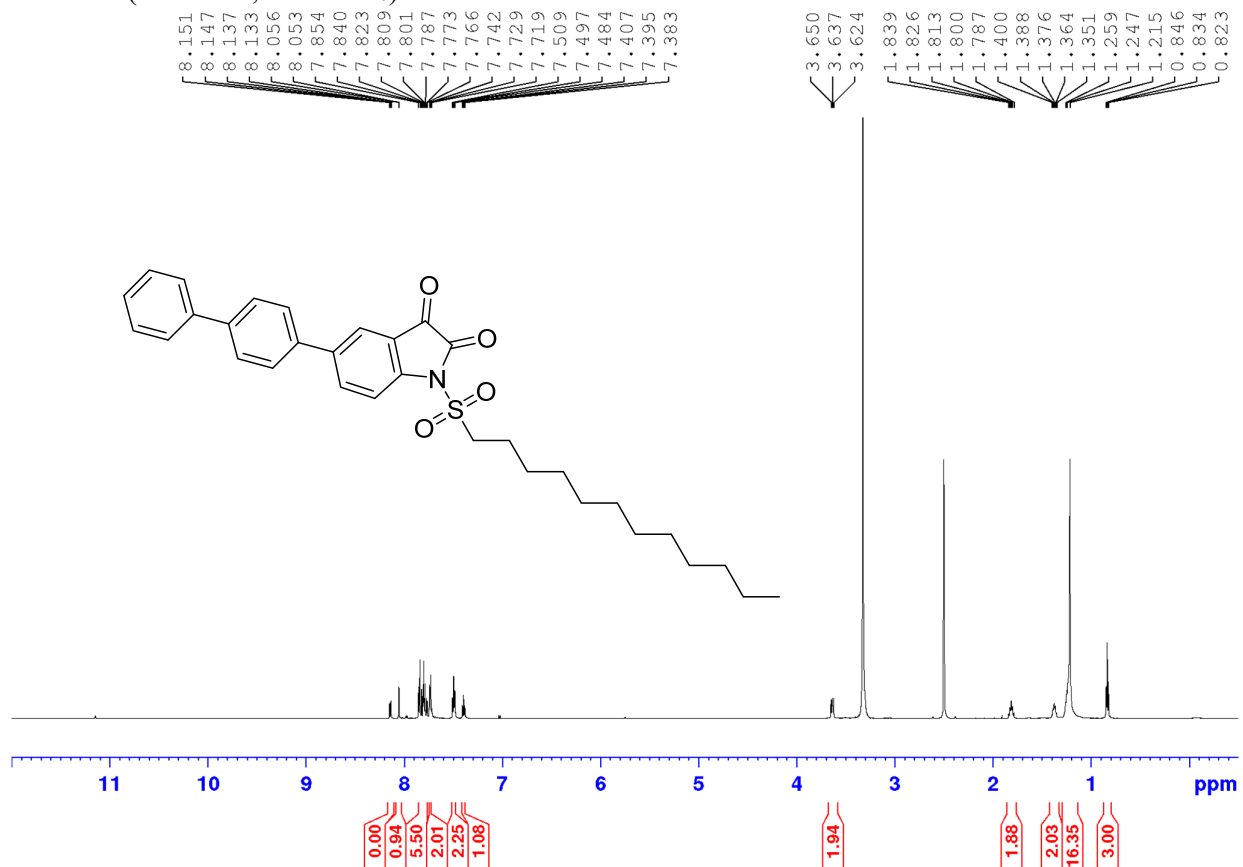

$^{13}\text{C}$  NMR (150 MHz,  $\text{DMSO}-d_6$ ):

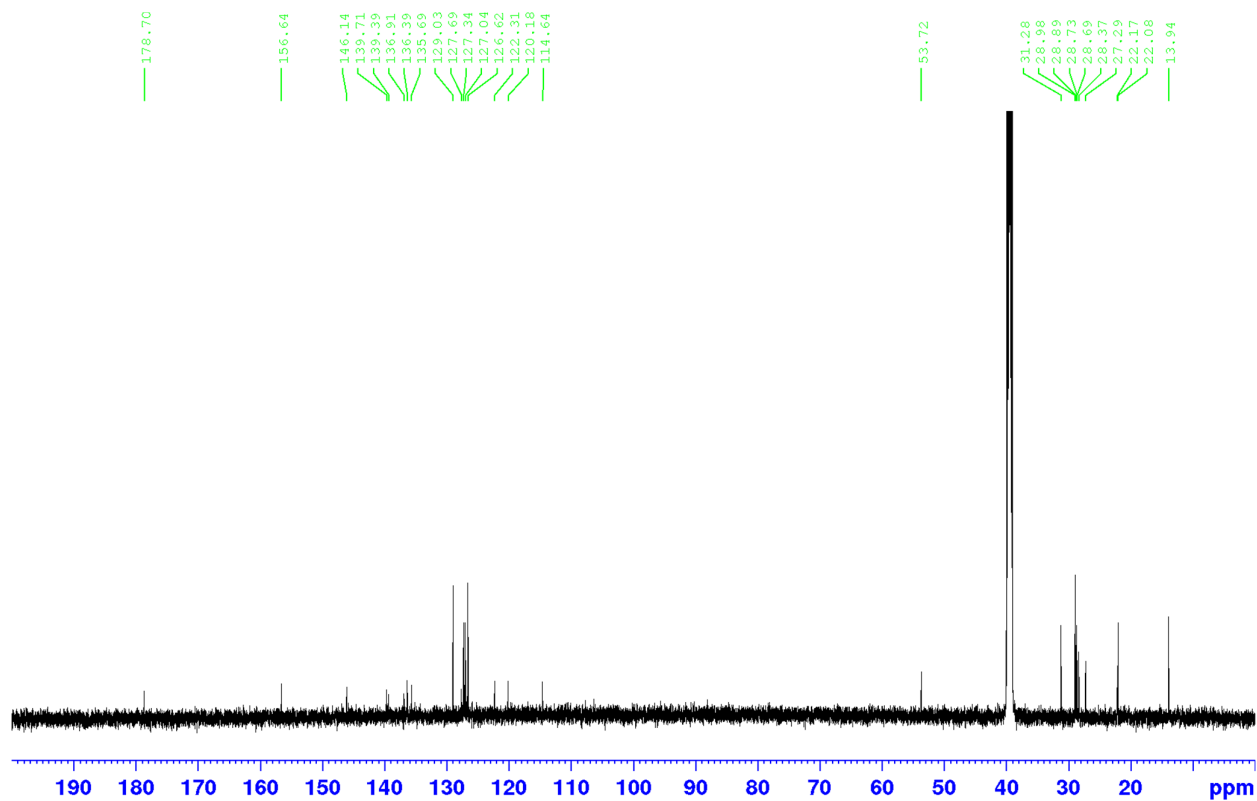

1-(Hexadecylsulfonyl)indoline-2,3-dione (**9a**)

$^1\text{H}$  NMR (400 MHz,  $\text{CDCl}_3$ ):

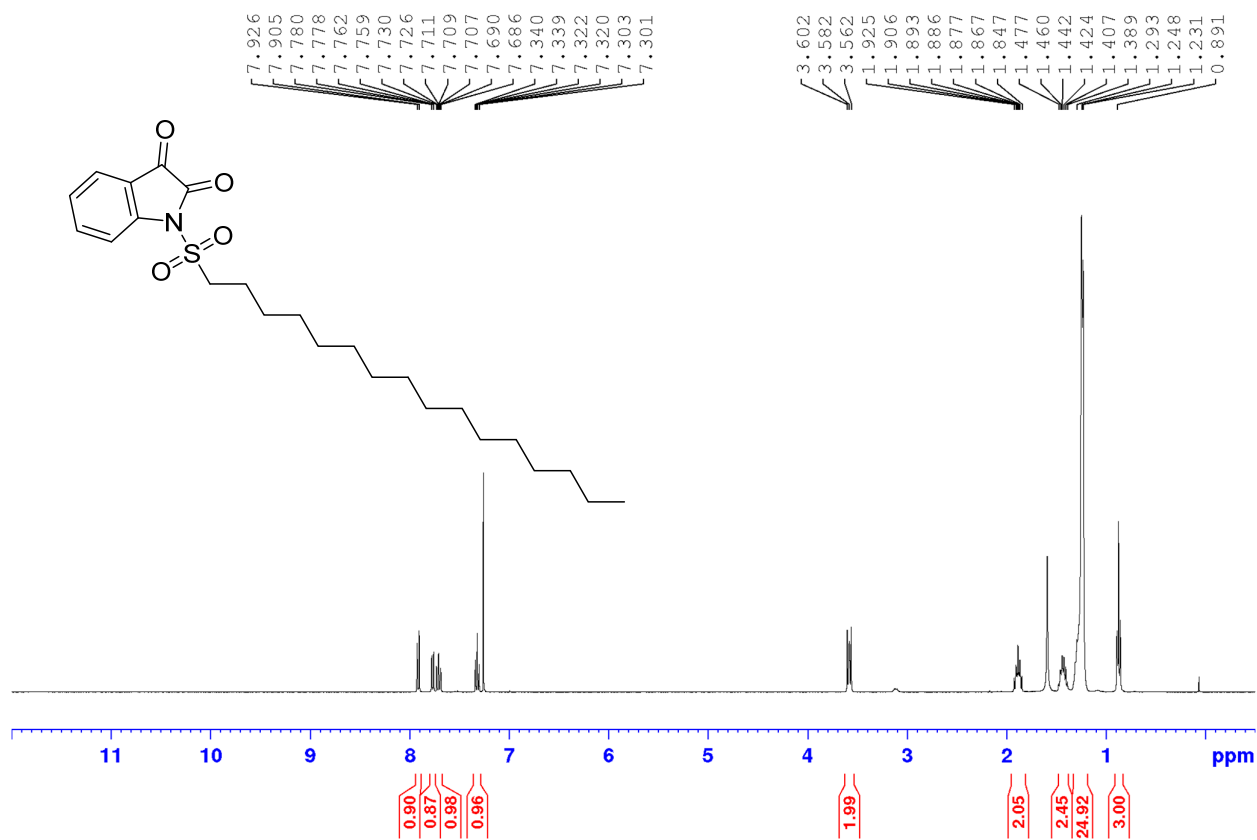

$^{13}\text{C}$  NMR (100 MHz,  $\text{CDCl}_3$ ):

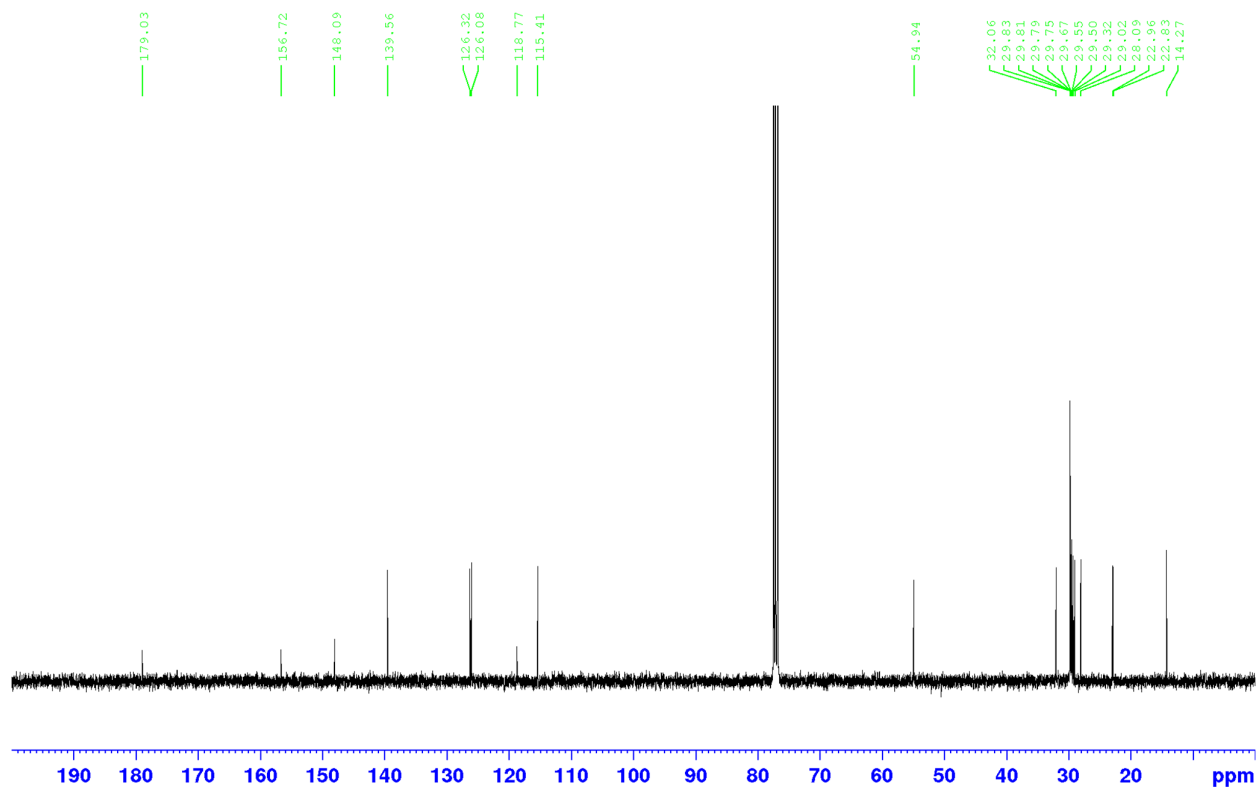

5-Bromo-1-(hexadecylsulfonyl)indoline-2,3-dione (**9b**)

$^1\text{H}$  NMR (600 MHz,  $\text{DMSO}-d_6$ ):

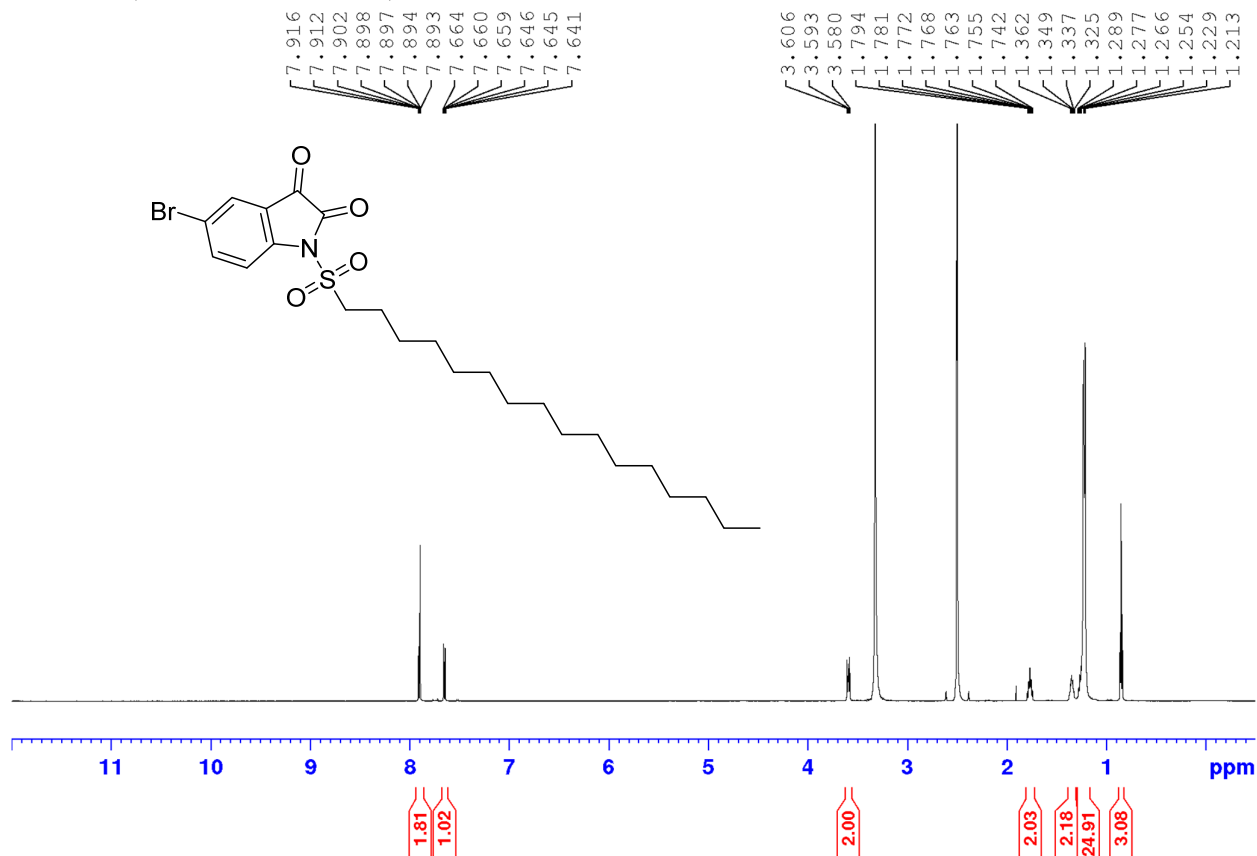

$^{13}\text{C}$  NMR (150 MHz,  $\text{DMSO}-d_6$ ):

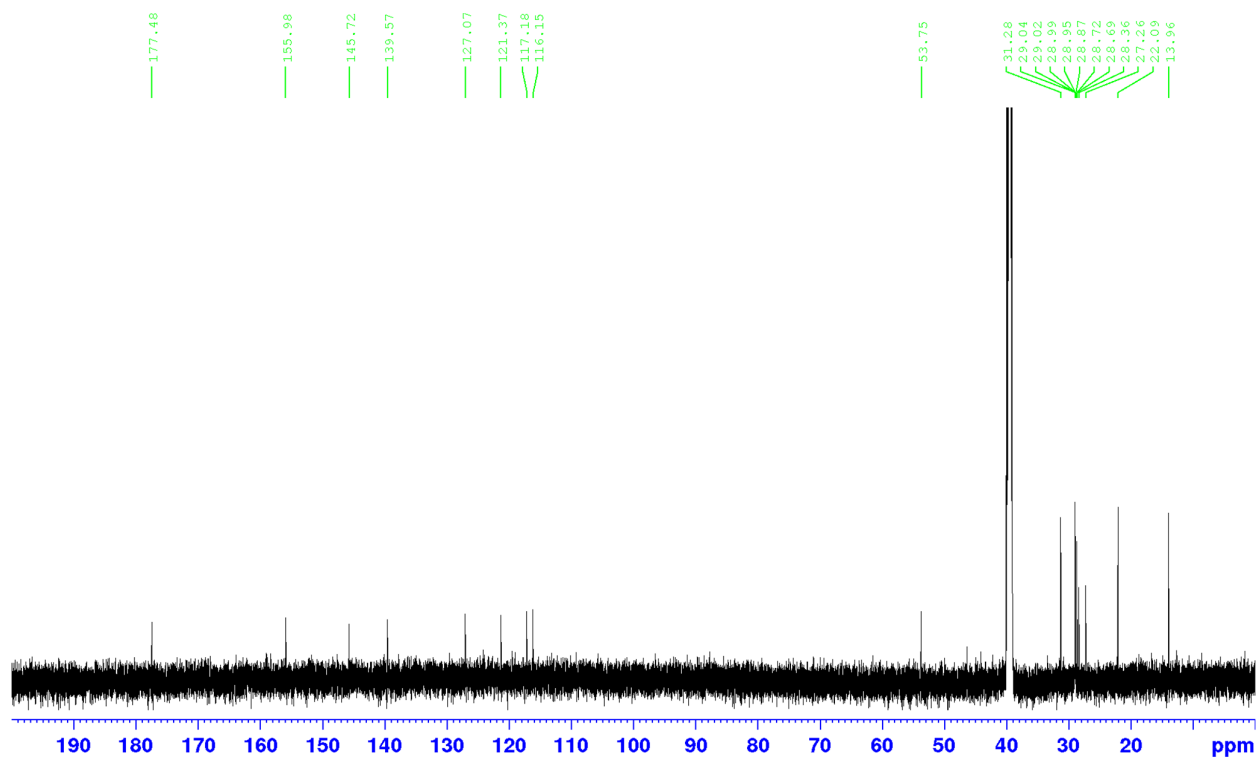



1-(Hexadecylsulfonyl)-5-phenylindoline-2,3-dione (**9c**)

$^1\text{H}$  NMR (600 MHz,  $\text{CDCl}_3$ ):

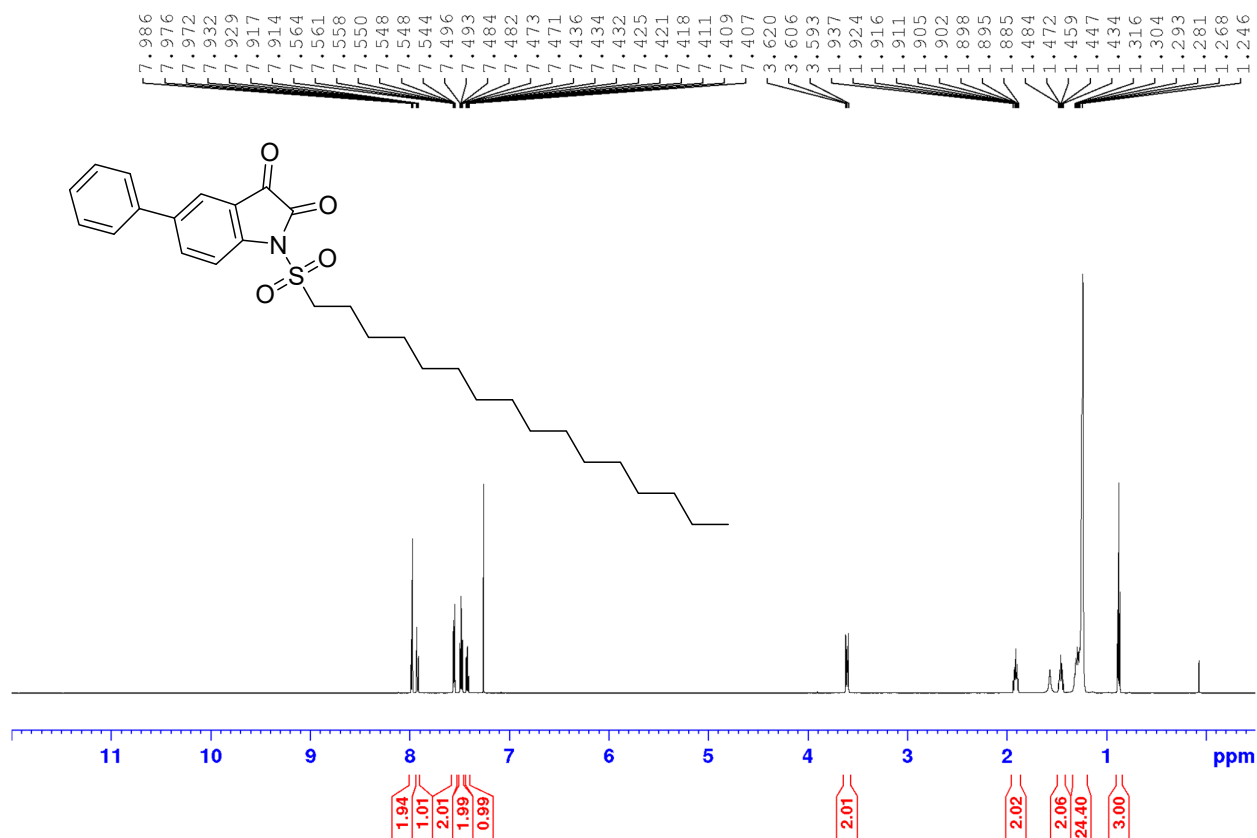

$^{13}\text{C}$  NMR (150 MHz,  $\text{CDCl}_3$ ):

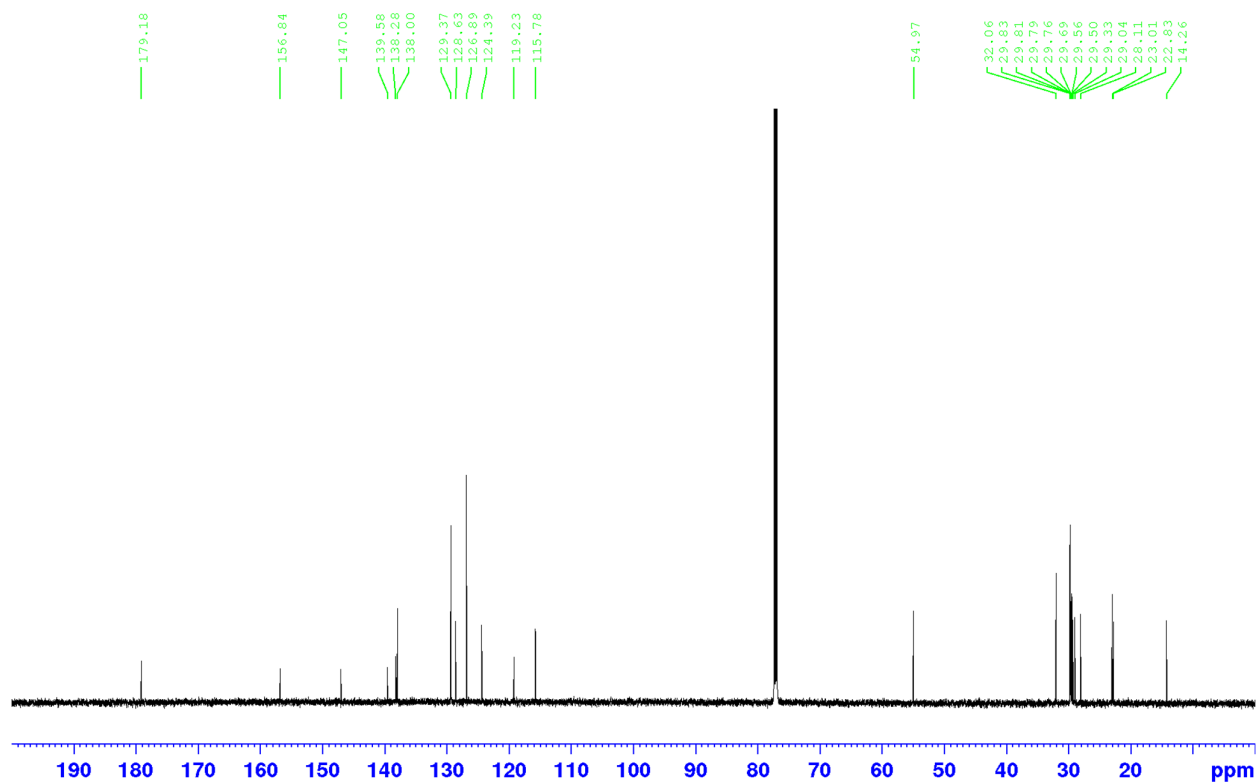

<sup>1</sup>H NMR (600 MHz, CDCl<sub>3</sub>):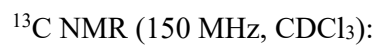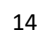

*N*-(3-(Dimethylamino)propyl)-2-(2-(dodecylsulfonamido)phenyl)-2-oxoacetamide (**11a**)

$^1\text{H}$  NMR (400 MHz,  $\text{CDCl}_3$ ):

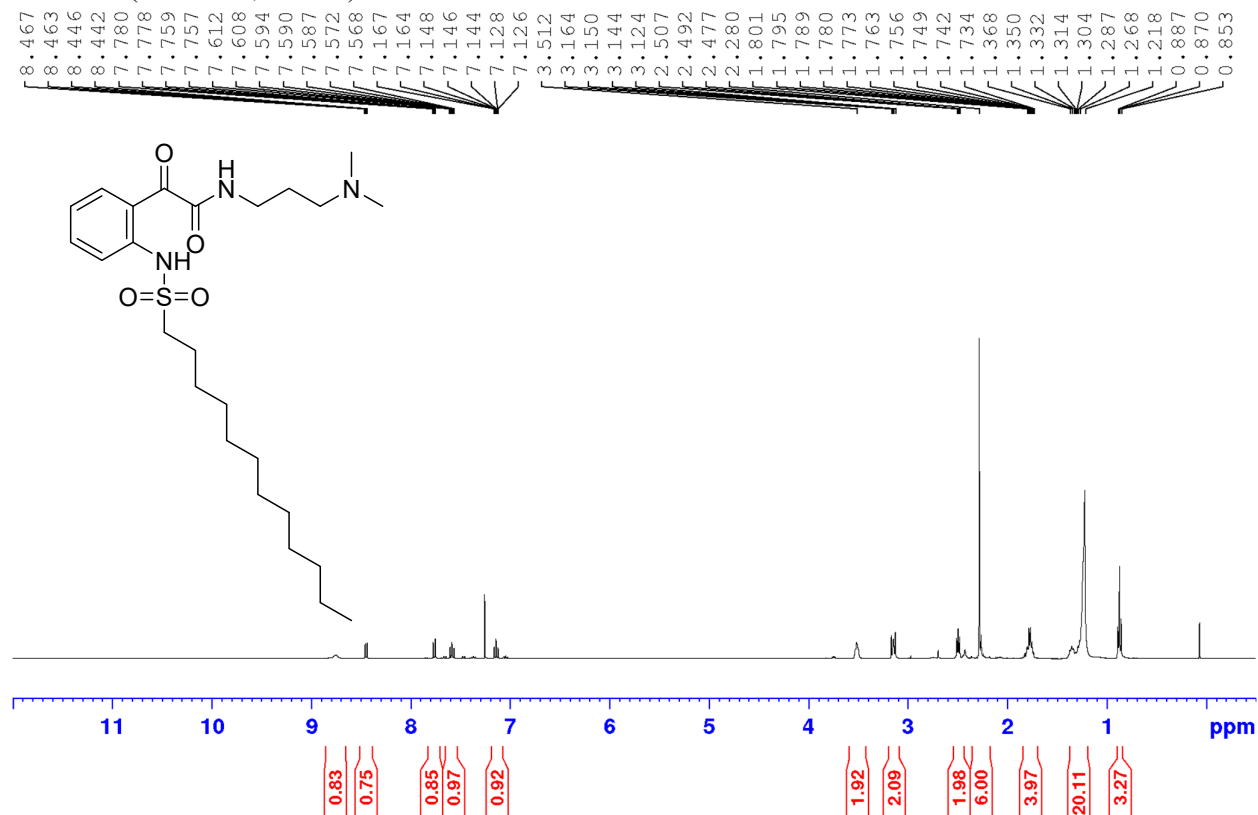

$^{13}\text{C}$  NMR (100 MHz,  $\text{CDCl}_3$ ):

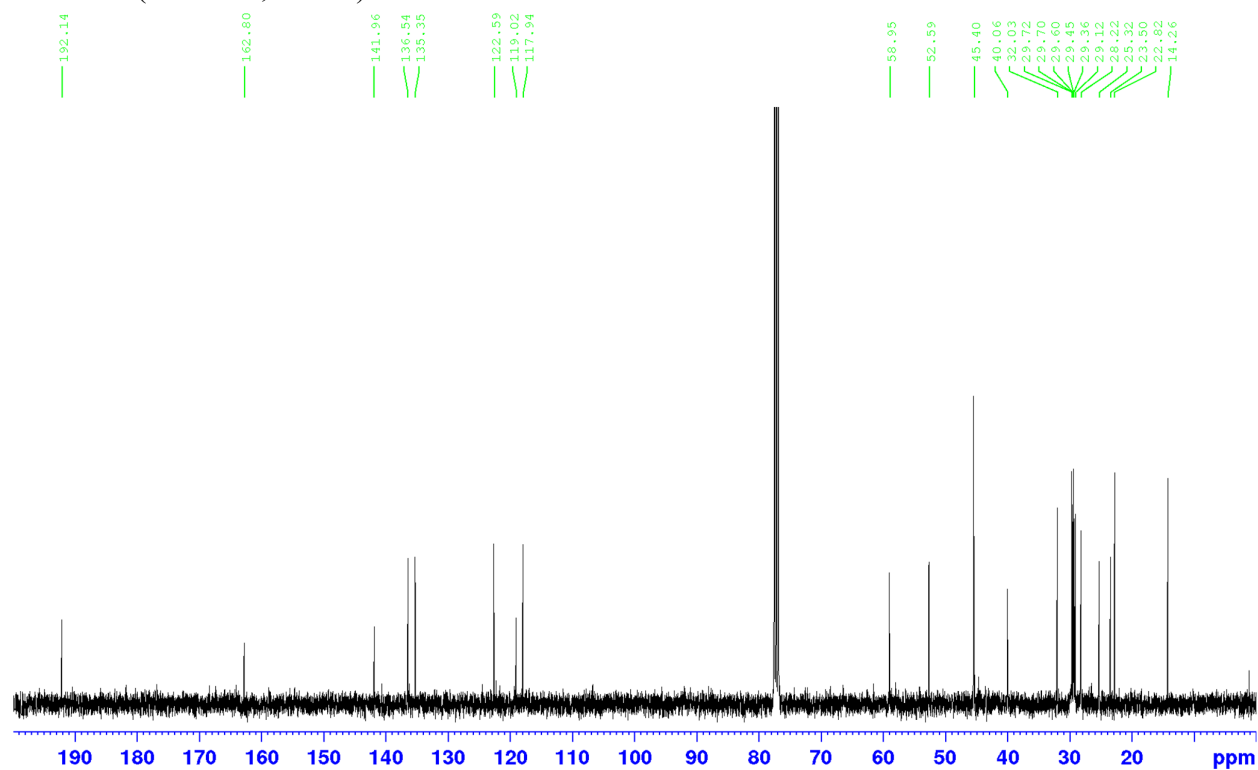

2-(5-Bromo-2-(dodecylsulfonamido)phenyl)-*N*-(3-(dimethylamino)propyl)-2-oxoacetamide (**11b**)

$^1\text{H}$  NMR (400 MHz,  $\text{CDCl}_3$ ):

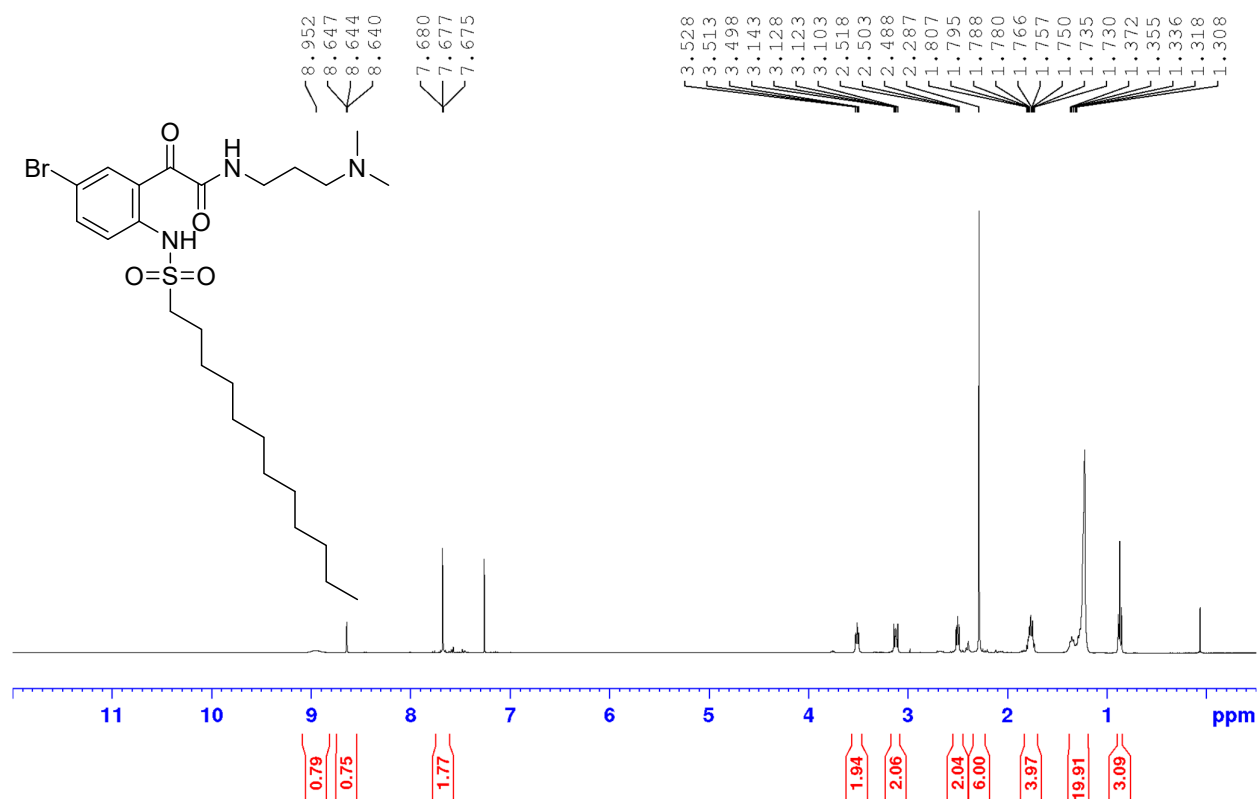

$^{13}\text{C}$  NMR (100 MHz,  $\text{CDCl}_3$ ):

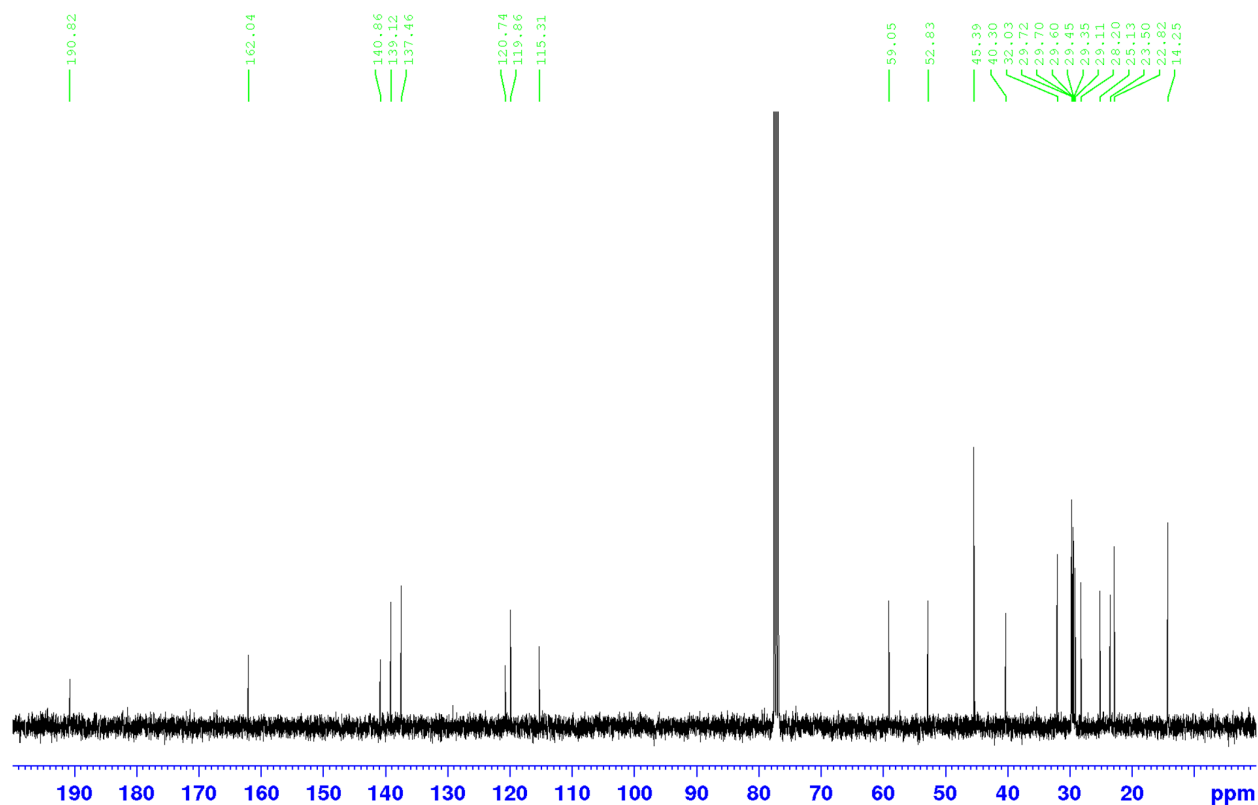

<sup>1</sup>H NMR (400 MHz, CDCl<sub>3</sub>):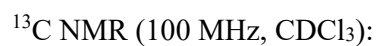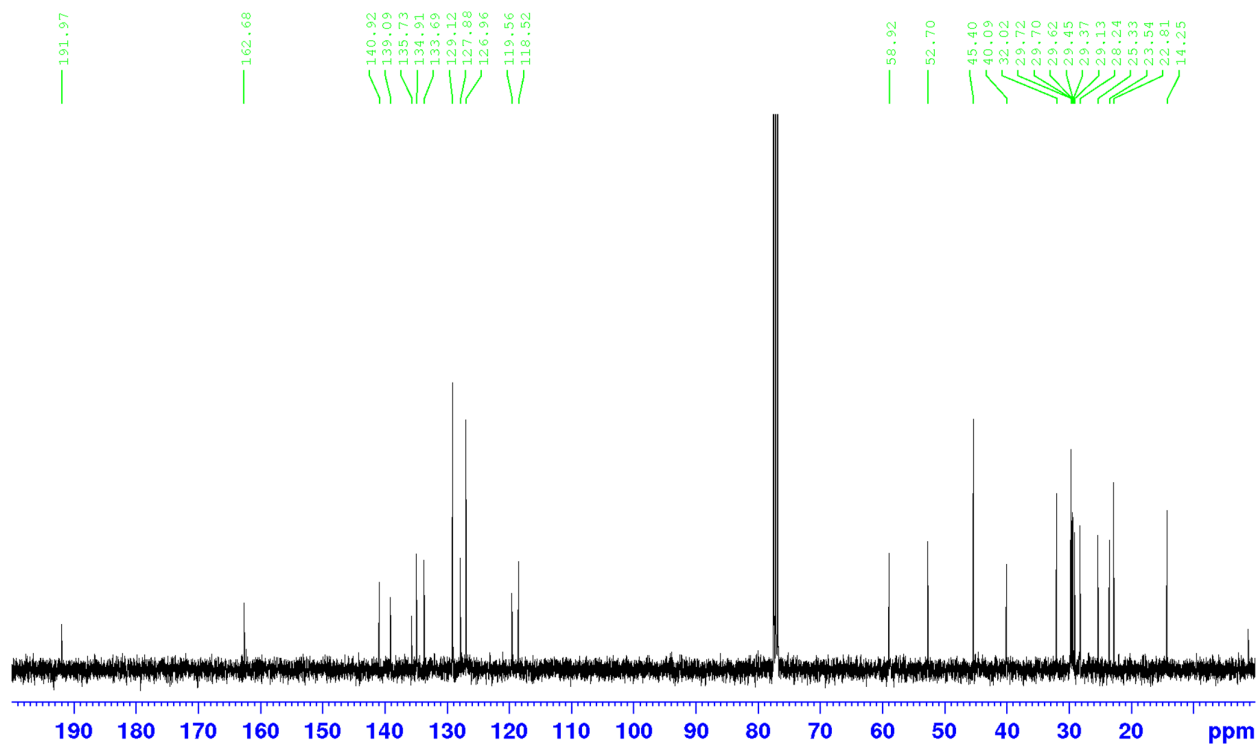

*N*-(3-(Dimethylamino)propyl)-2-(4-(dodecylsulfonamido)-[1,1':4',1''-terphenyl]-3-yl)-2-oxoacetamide  
(11d)

$^1\text{H}$  NMR (400 MHz,  $\text{CDCl}_3$ ):

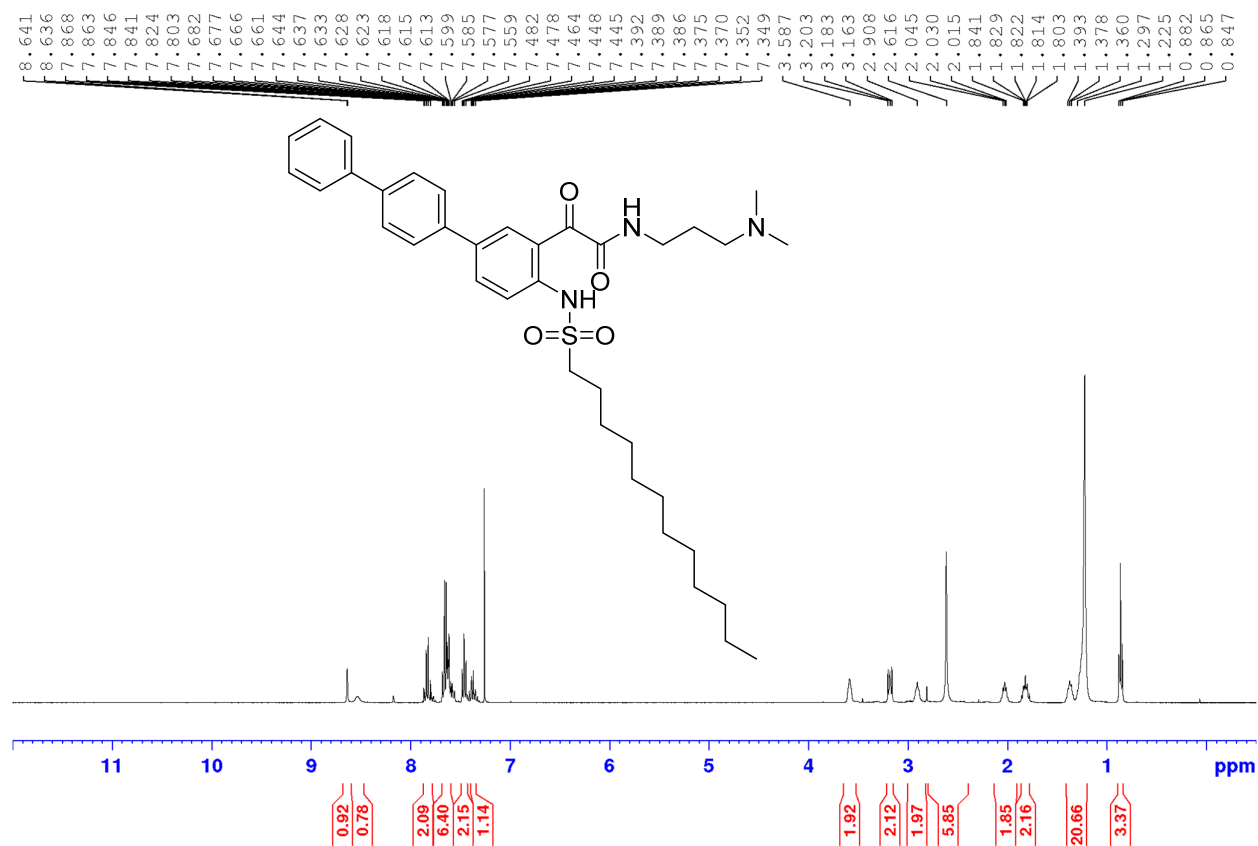

$^{13}\text{C}$  NMR (100 MHz,  $\text{CDCl}_3$ ):

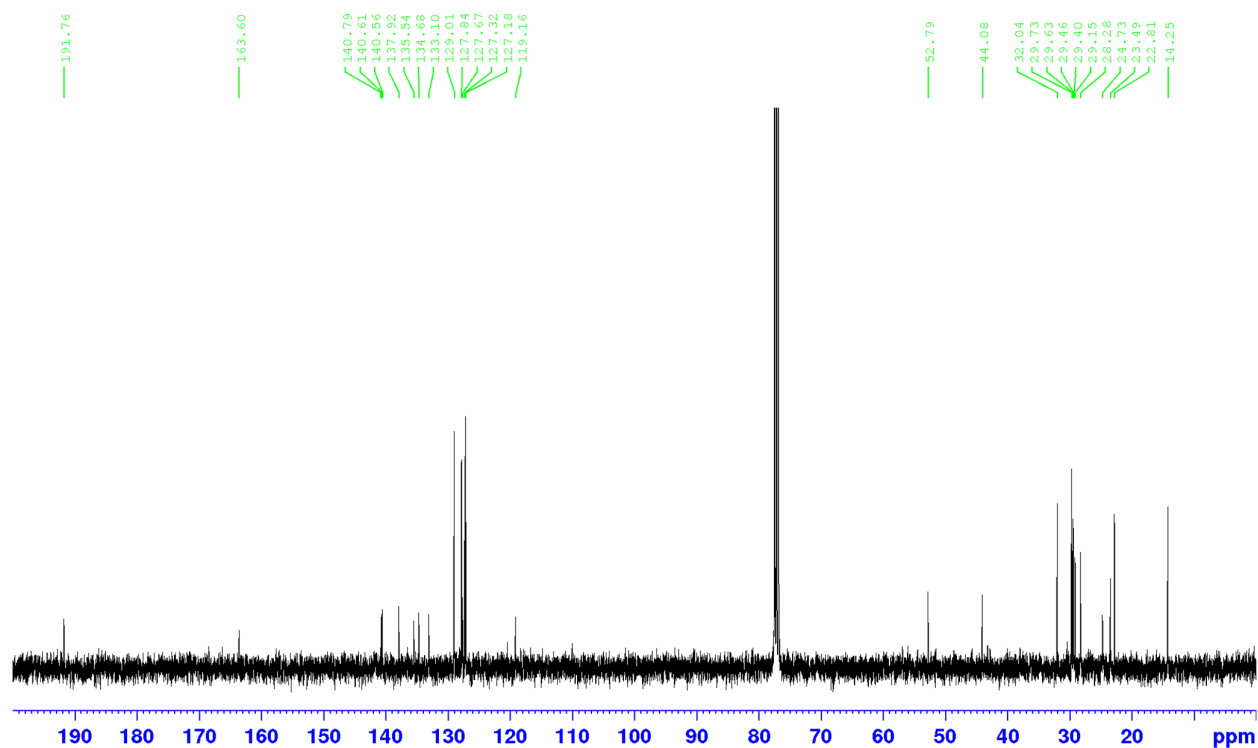

*N*-(3-(Dimethylamino)propyl)-2-(2-(hexadecylsulfonamido)phenyl)-2-oxoacetamide (**12a**)

$^1\text{H}$  NMR (400 MHz,  $\text{CDCl}_3$ ):

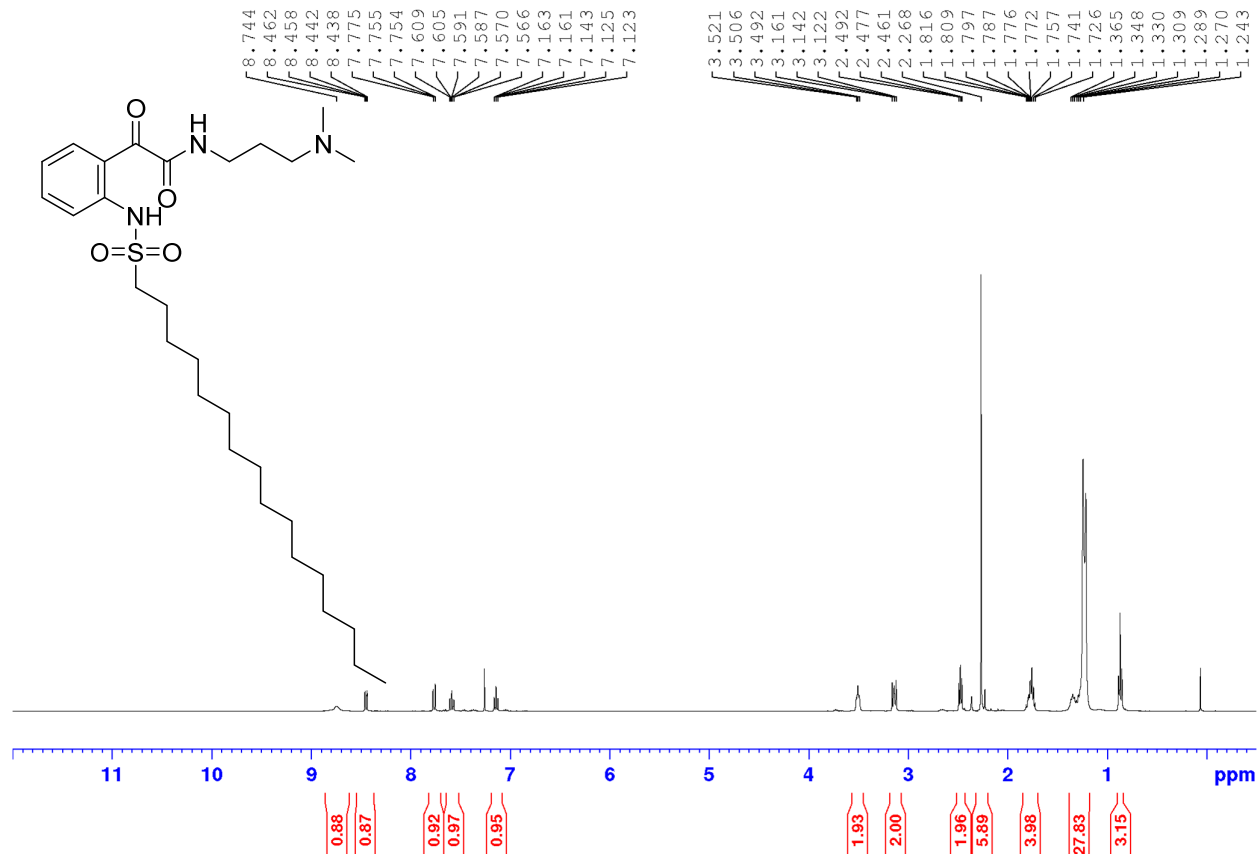

$^{13}\text{C}$  NMR (100 MHz,  $\text{CDCl}_3$ ):

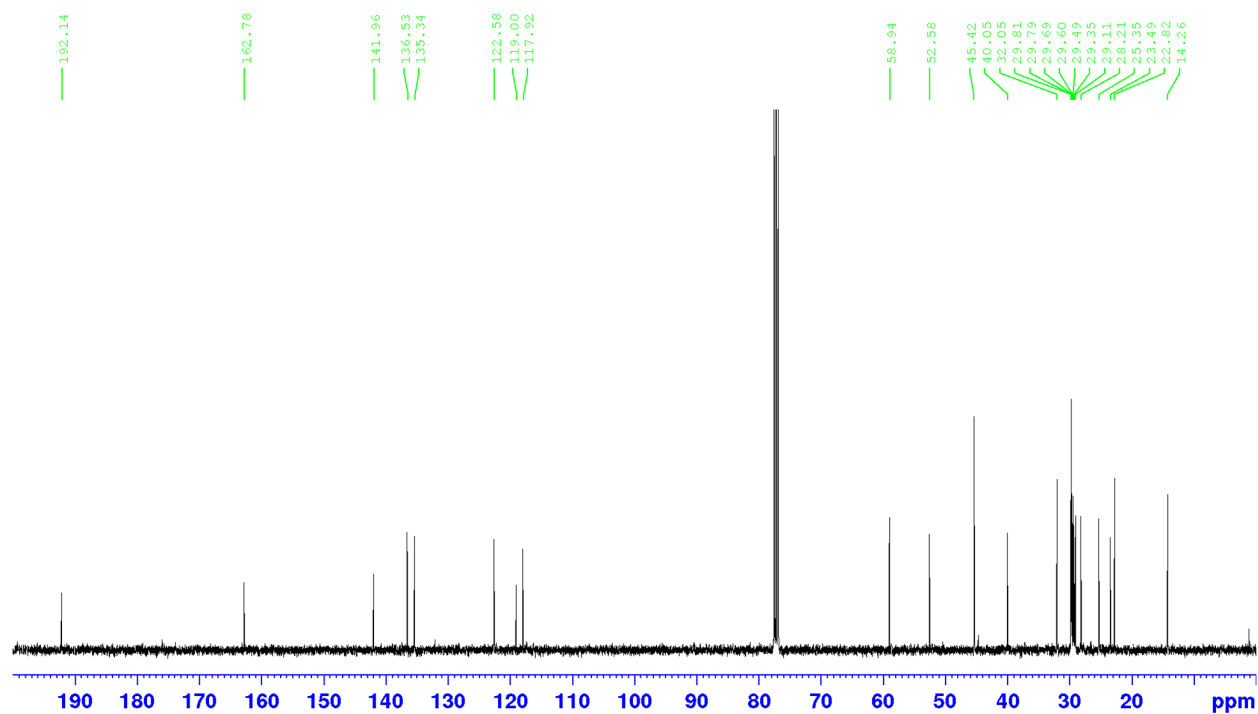

2-(5-Bromo-2-(hexadecylsulfonamido)phenyl)-*N*-(3-(dimethylamino)propyl)-2-oxoacetamide (**12b**)

$^1\text{H}$  NMR (400 MHz,  $\text{CDCl}_3$ ):

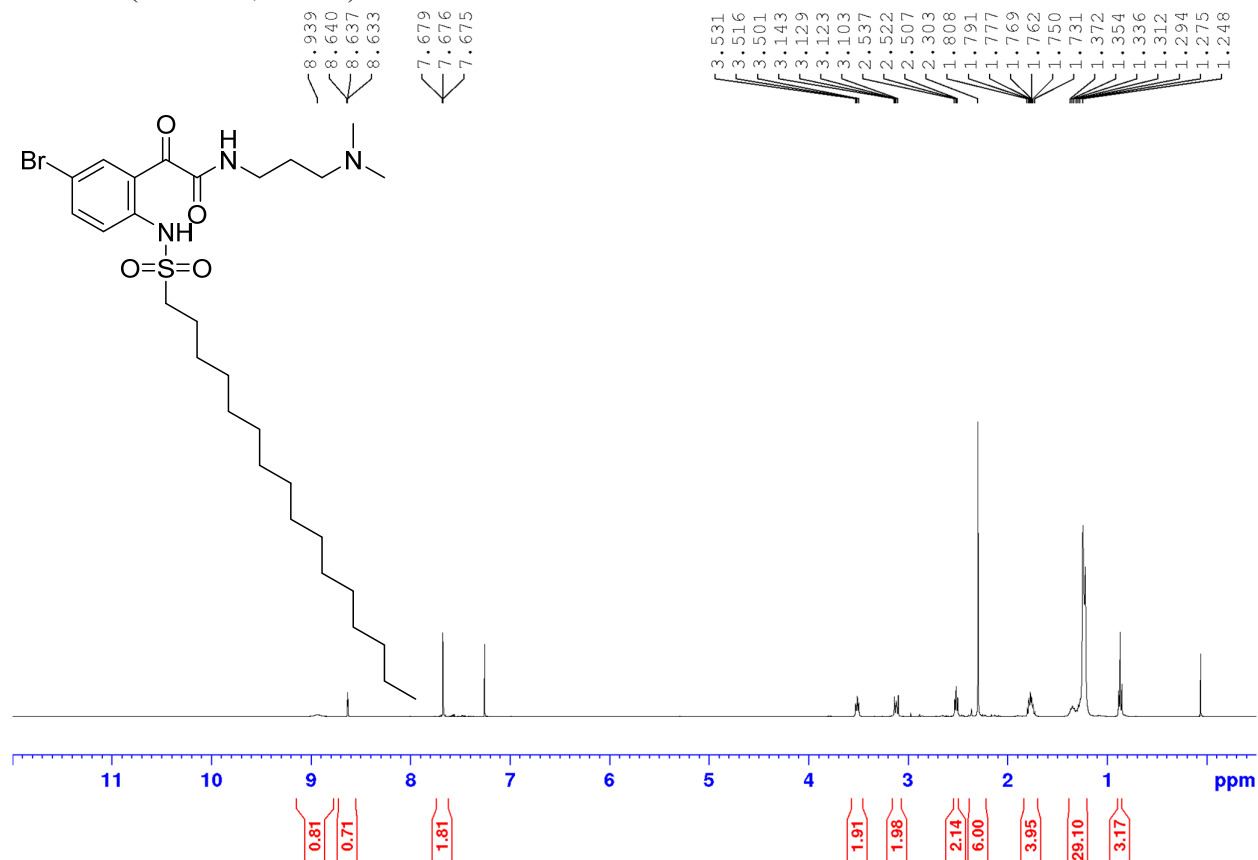

$^{13}\text{C}$  NMR (100 MHz,  $\text{CDCl}_3$ ):

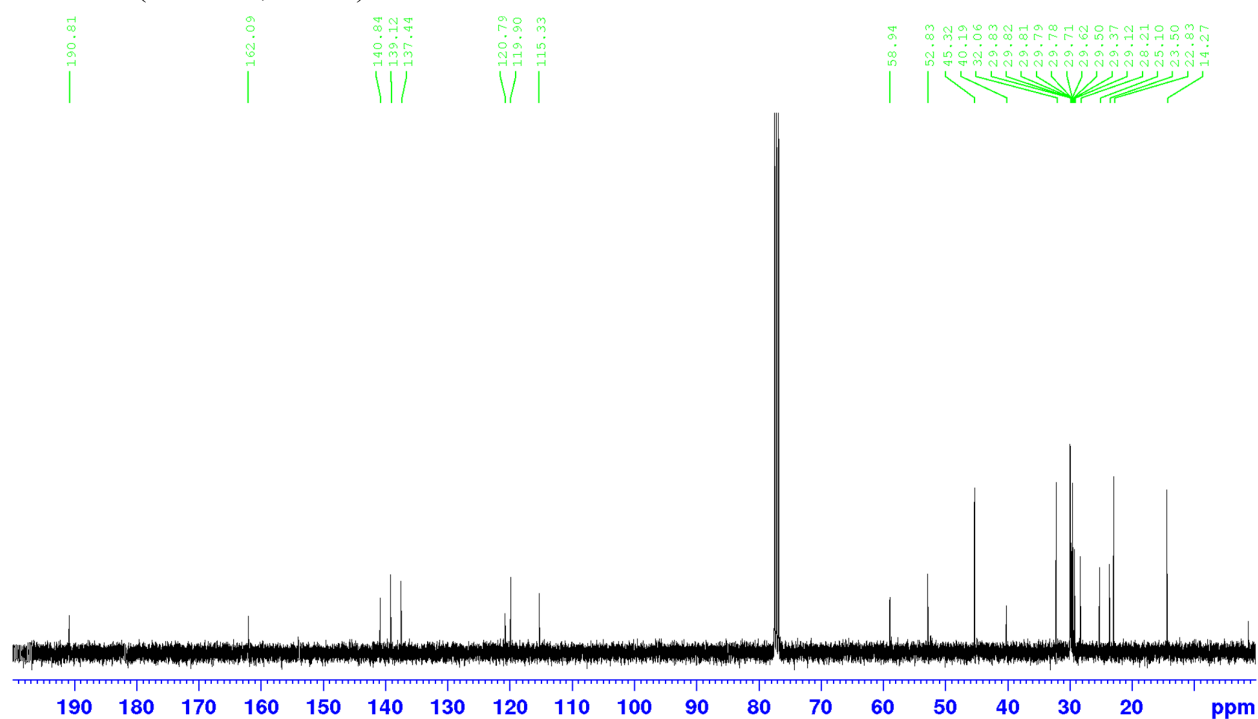



*N*-(3-(Dimethylamino)propyl)-2-(4-(hexadecylsulfonamido)-[1,1'-biphenyl]-3-yl)-2-oxoacetamide  
(12c)

<sup>1</sup>H NMR (400 MHz, CDCl<sub>3</sub>):

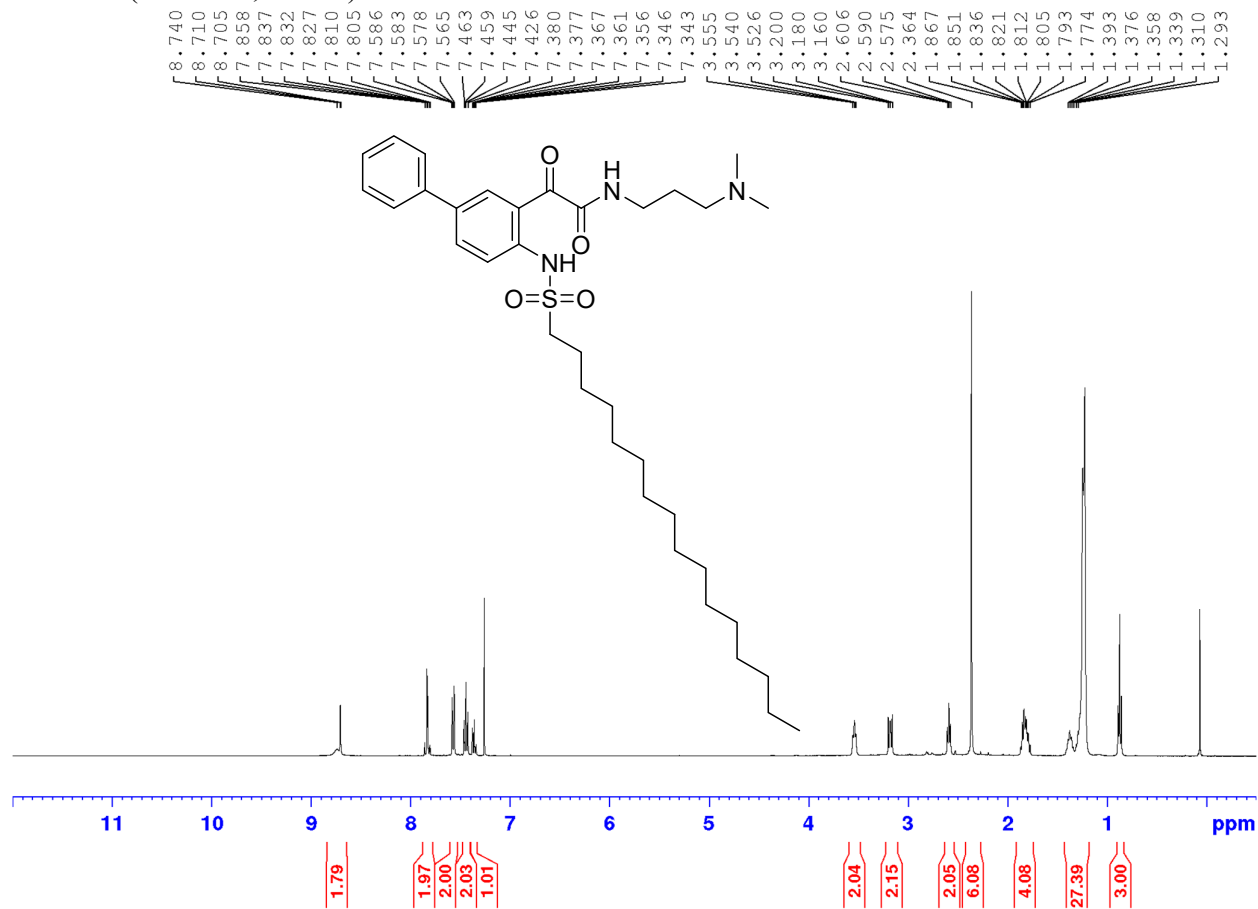

<sup>13</sup>C NMR (100 MHz, CDCl<sub>3</sub>):

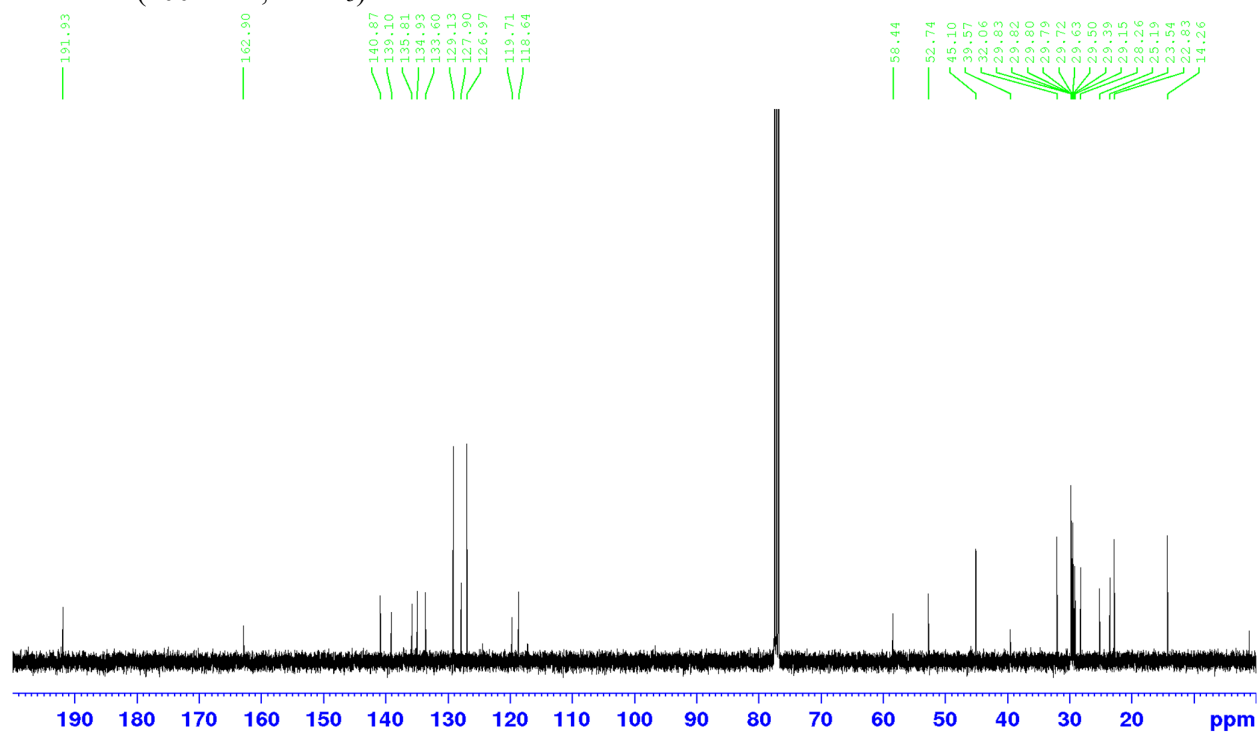

*N,N*-Dimethyl-3-(2-(4-(octylsulfonamido)-[1,1':4',1''-terphenyl]-3-yl)-2-oxoacetamido)propan-1-aminium chloride (**13d**)

$^1\text{H}$  NMR (600 MHz,  $\text{DMSO}-d_6$ ):

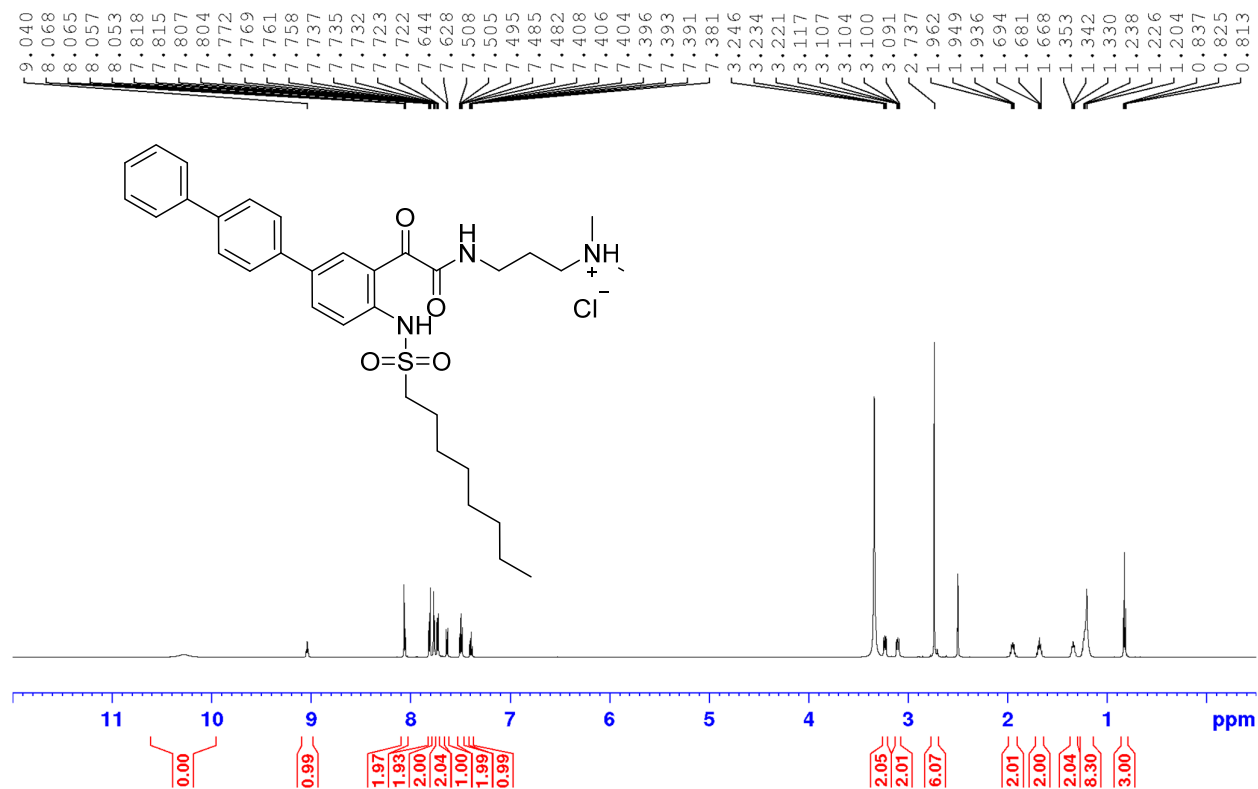

$^{13}\text{C}$  NMR (150 MHz,  $\text{DMSO}-d_6$ ):

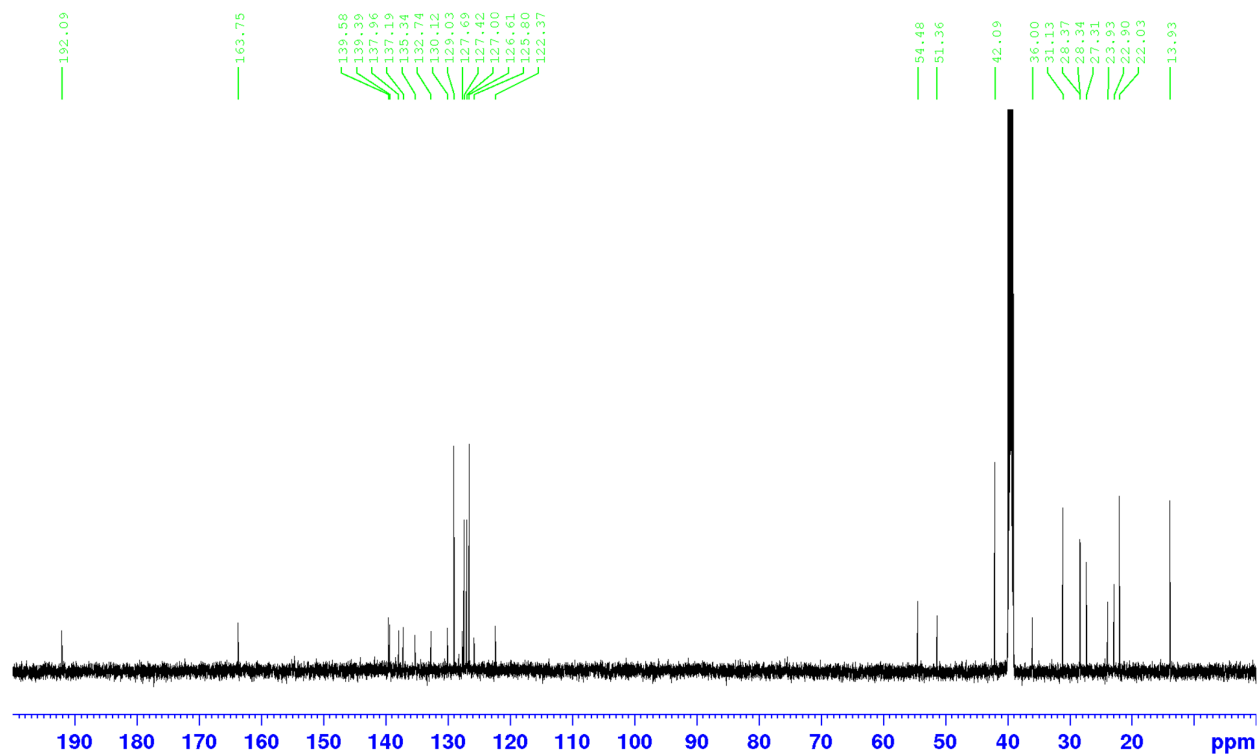

3-(2-(2-(Dodecylsulfonamido)phenyl)-2-oxoacetamido)-*N,N*-dimethylpropan-1-aminium chloride  
(14a)

$^1\text{H}$  NMR (600 MHz,  $\text{DMSO}-d_6$ ):

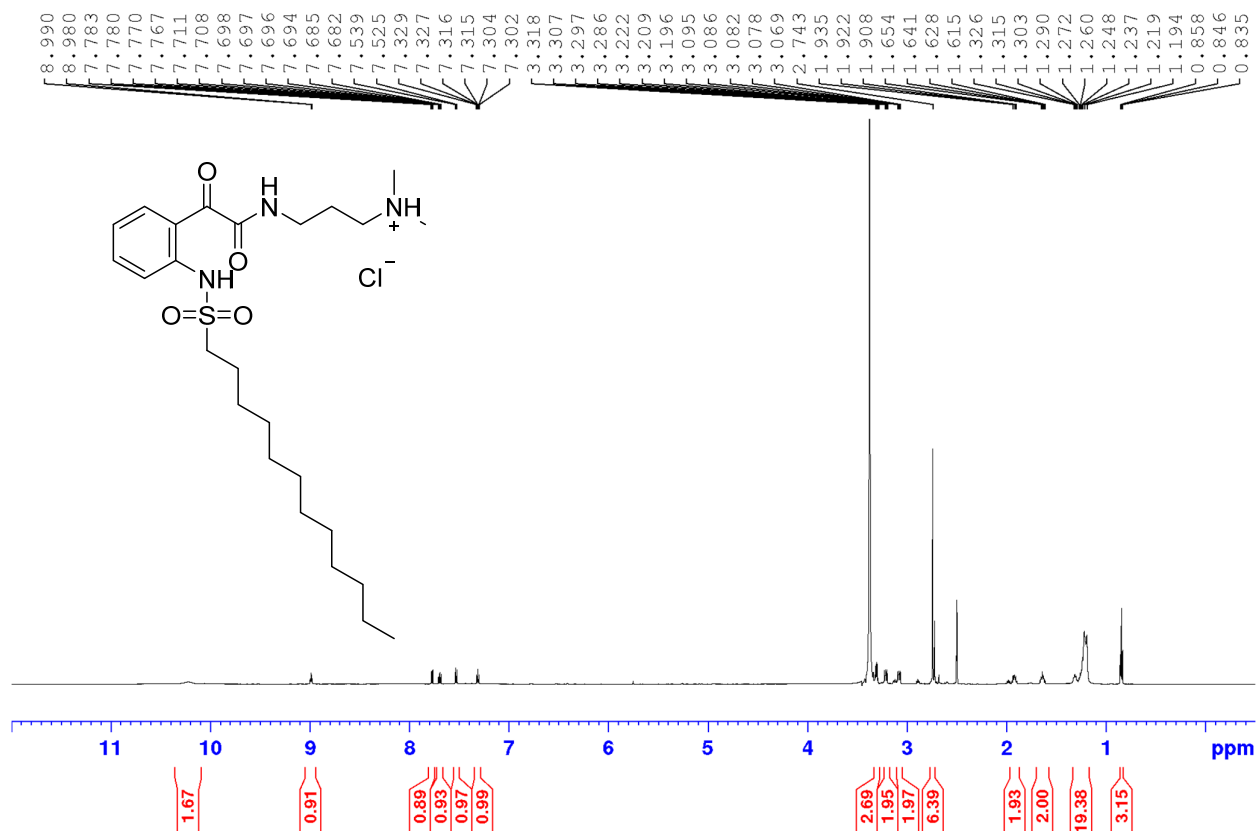

$^{13}\text{C}$  NMR (150 MHz,  $\text{DMSO}-d_6$ ):

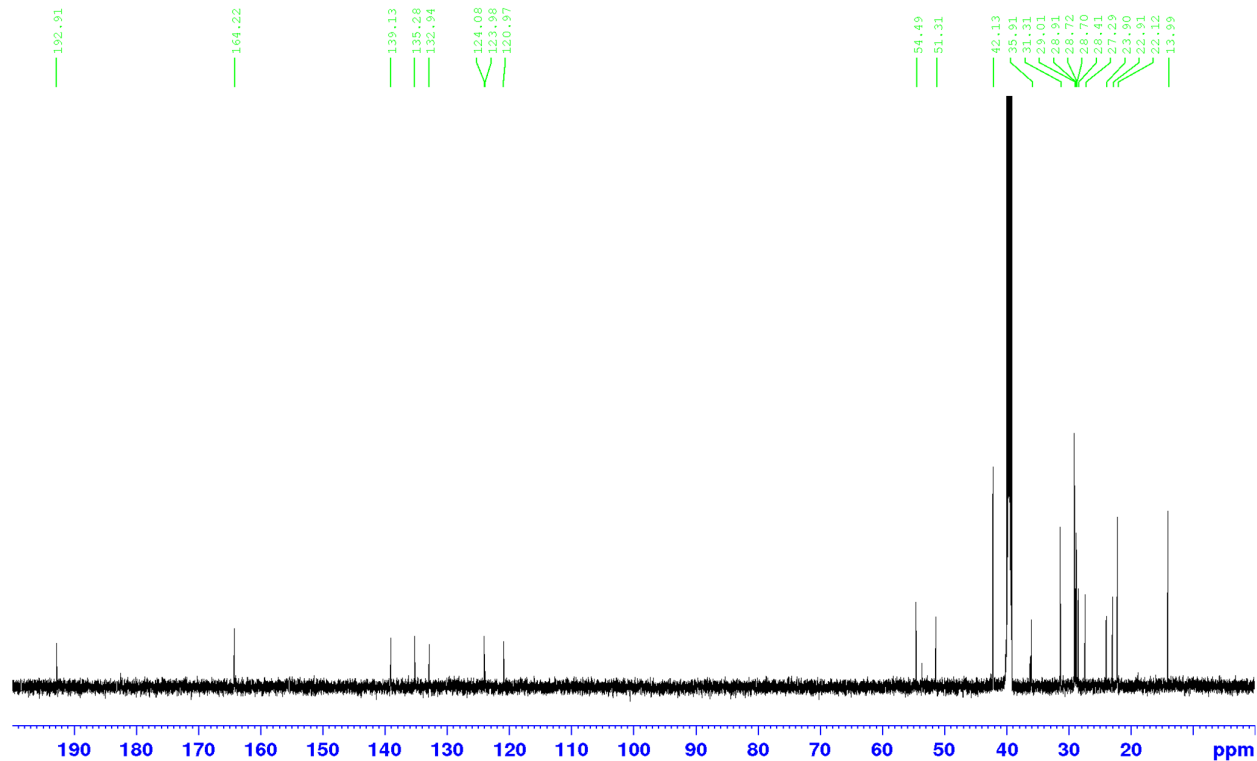

3-(2-(5-Bromo-2-(dodecylsulfonamido)phenyl)-2-oxoacetamido)-*N,N*-dimethylpropan-1-aminium chloride (**14b**)

$^1\text{H}$  NMR (600 MHz,  $\text{DMSO}-d_6$ ):

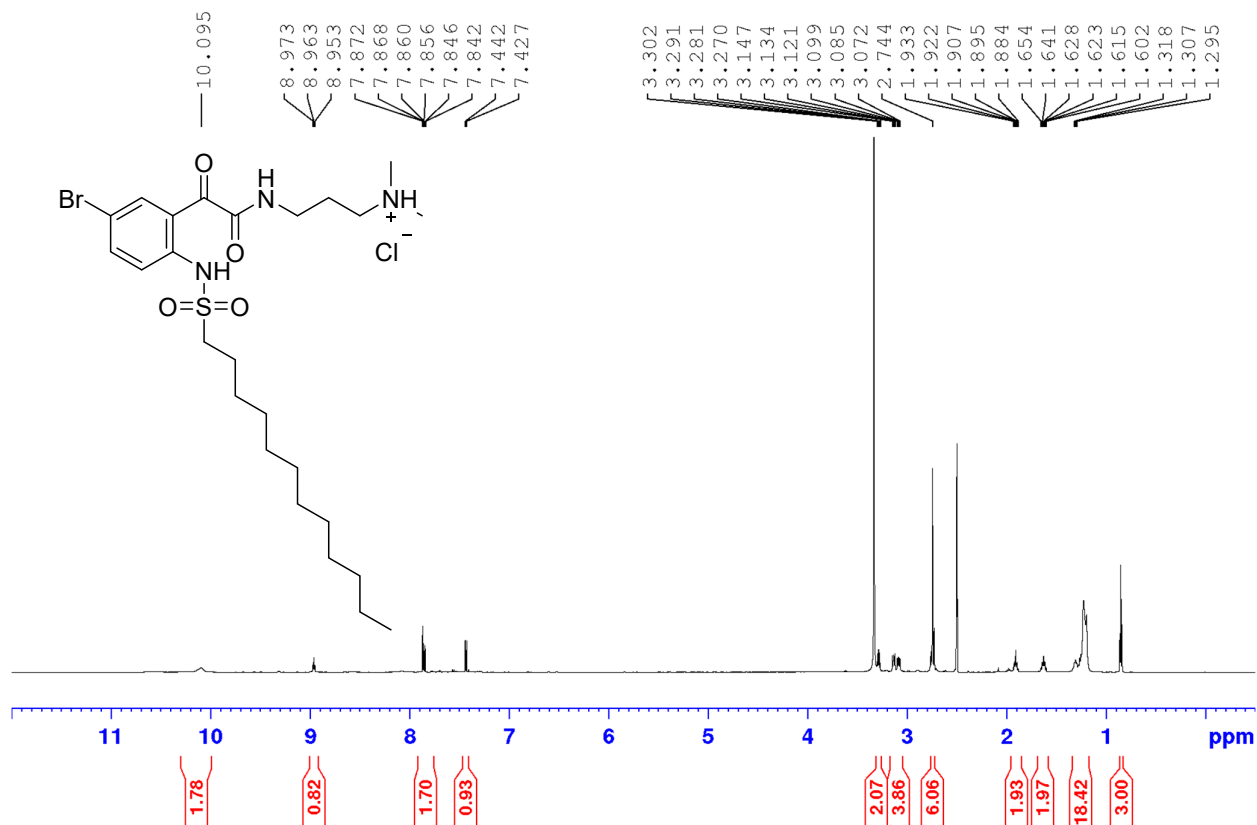

$^{13}\text{C}$  NMR (150 MHz,  $\text{DMSO}-d_6$ ):

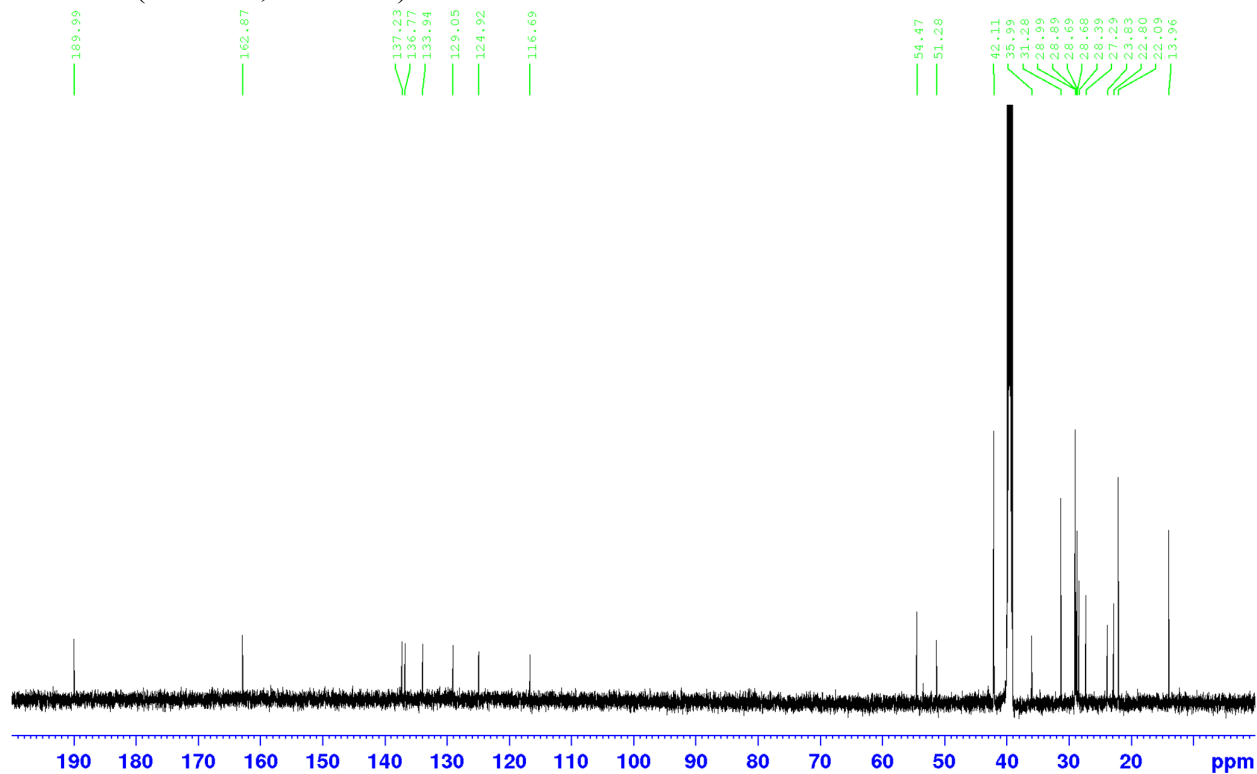

3-(2-(4-(Dodecylsulfonamido)-[1,1'-biphenyl]-3-yl)-2-oxoacetamido)-*N,N*-dimethylpropan-1-aminium chloride (**14c**)

<sup>1</sup>H NMR (600 MHz, DMSO-*d*<sub>6</sub>):

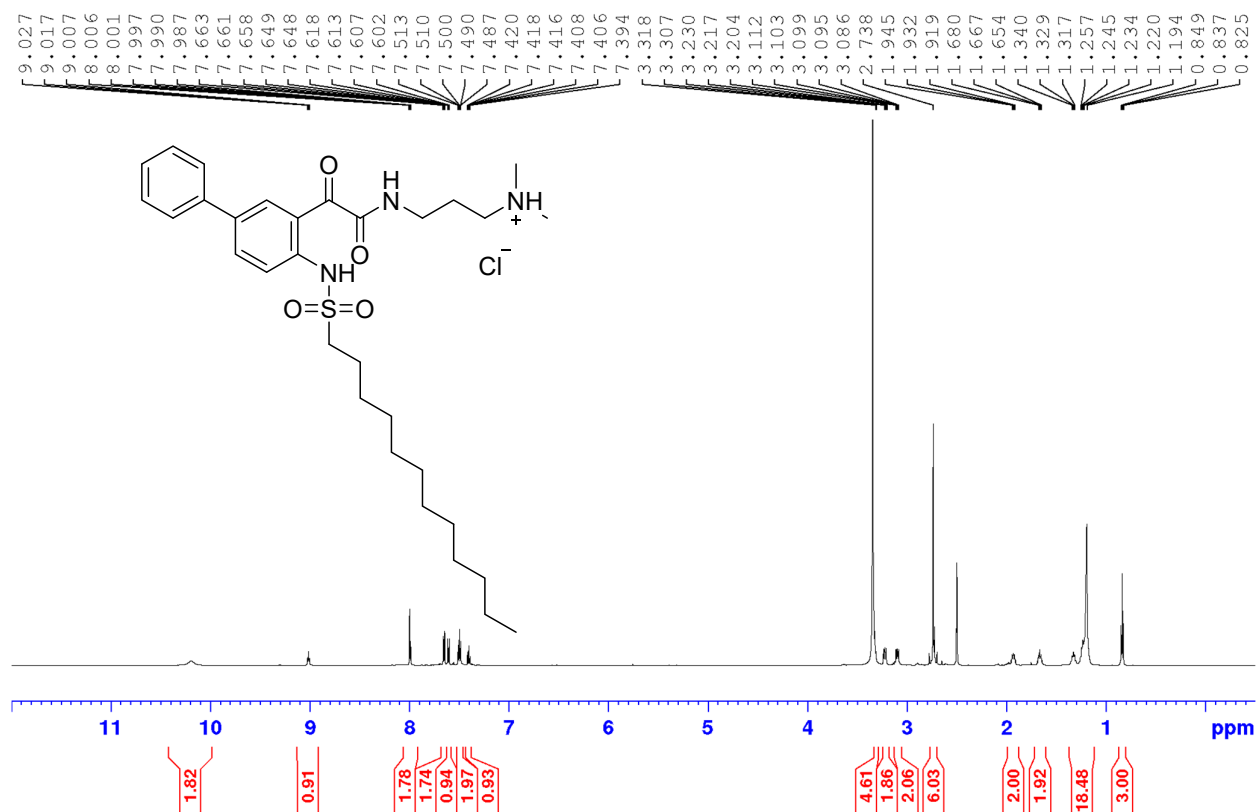

<sup>13</sup>C NMR (150 MHz, DMSO-*d*<sub>6</sub>):

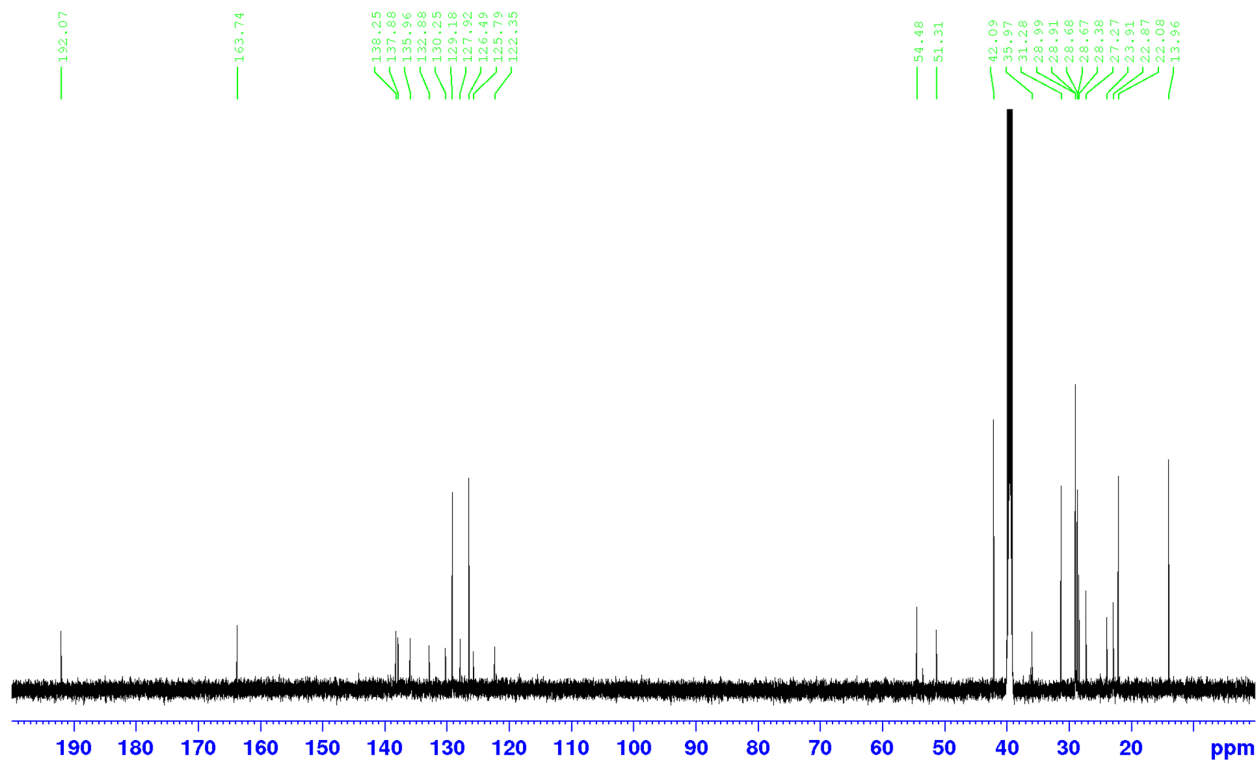

3-(2-(4-(Dodecylsulfonamido)-[1,1':4',1''-terphenyl]-3-yl)-2-oxoacetamido)-*N,N*-dimethylpropan-1-aminium chloride (**14d**)

$^1\text{H}$  NMR (600 MHz,  $\text{DMSO}-d_6$ ):

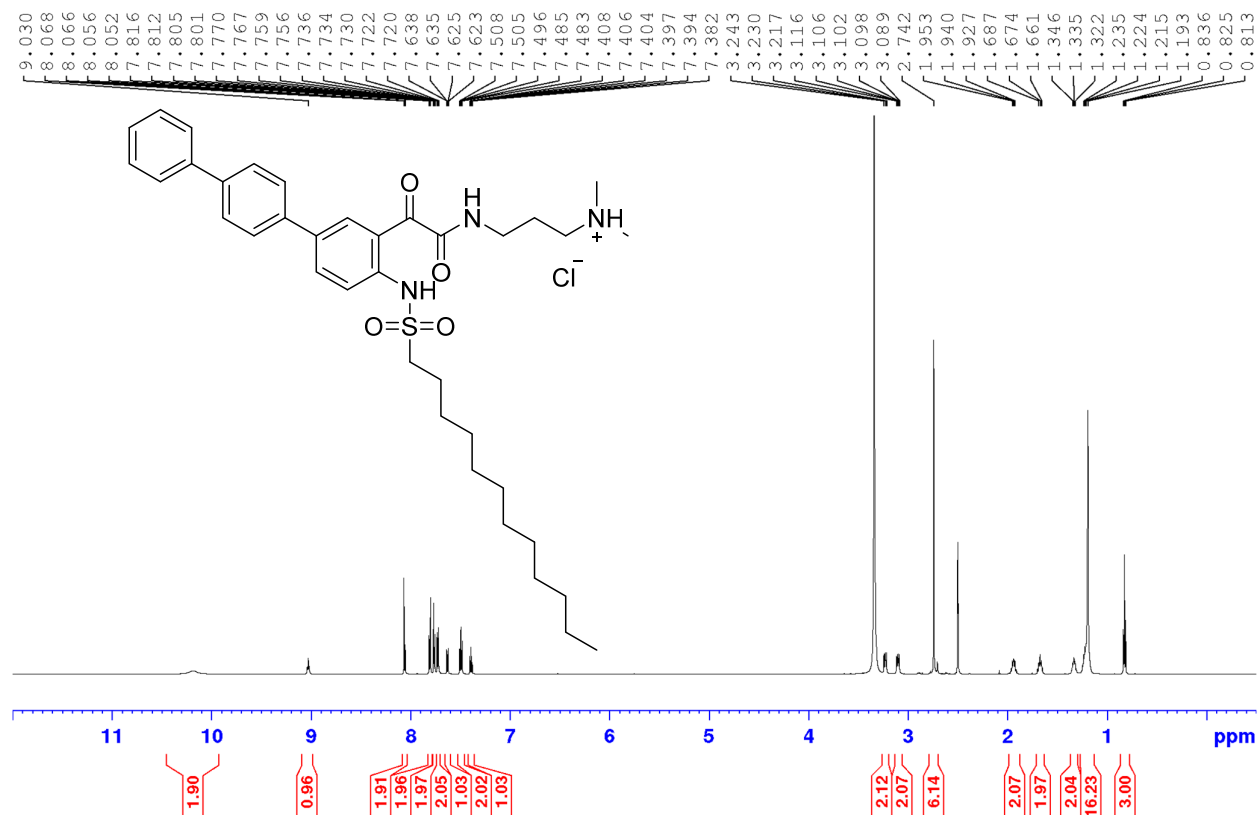

$^{13}\text{C}$  NMR (150 MHz,  $\text{DMSO}-d_6$ ):

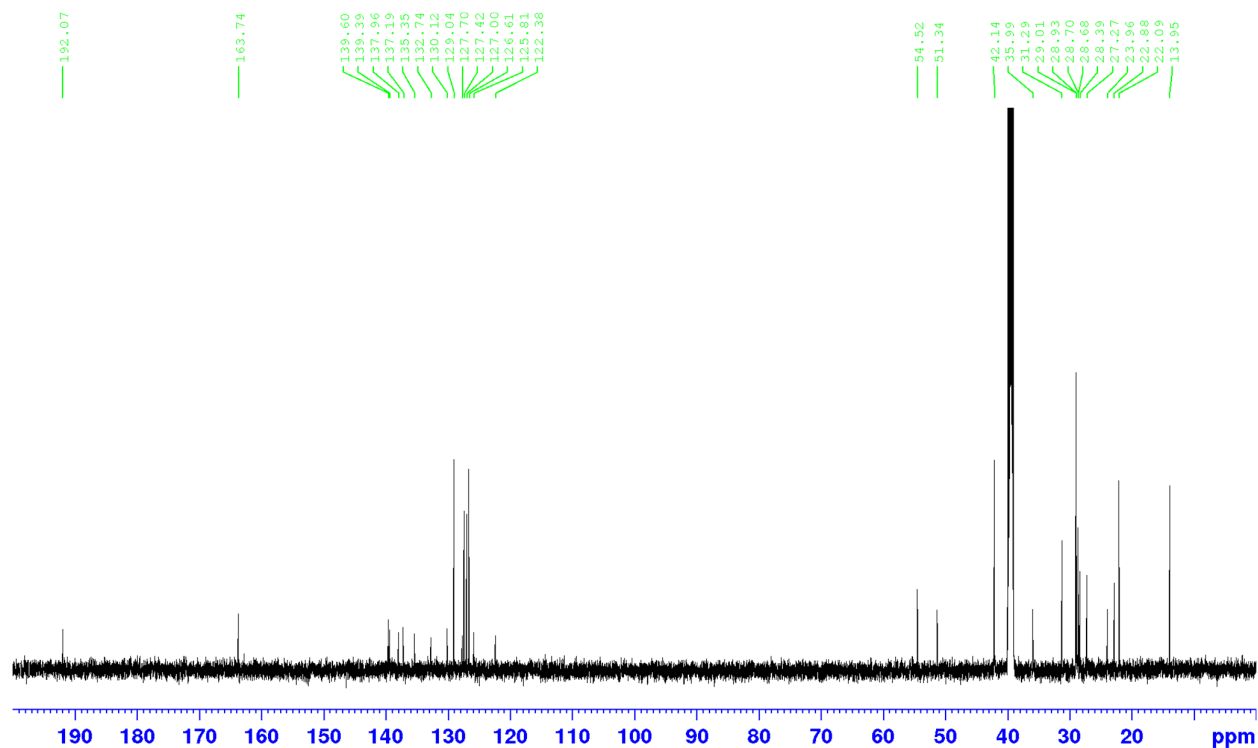

3-(2-(2-(Hexadecylsulfonamido)phenyl)-2-oxoacetamido)-*N,N*-dimethylpropan-1-aminium chloride  
(15a)

$^1\text{H}$  NMR (600 MHz,  $\text{DMSO}-d_6$ ):

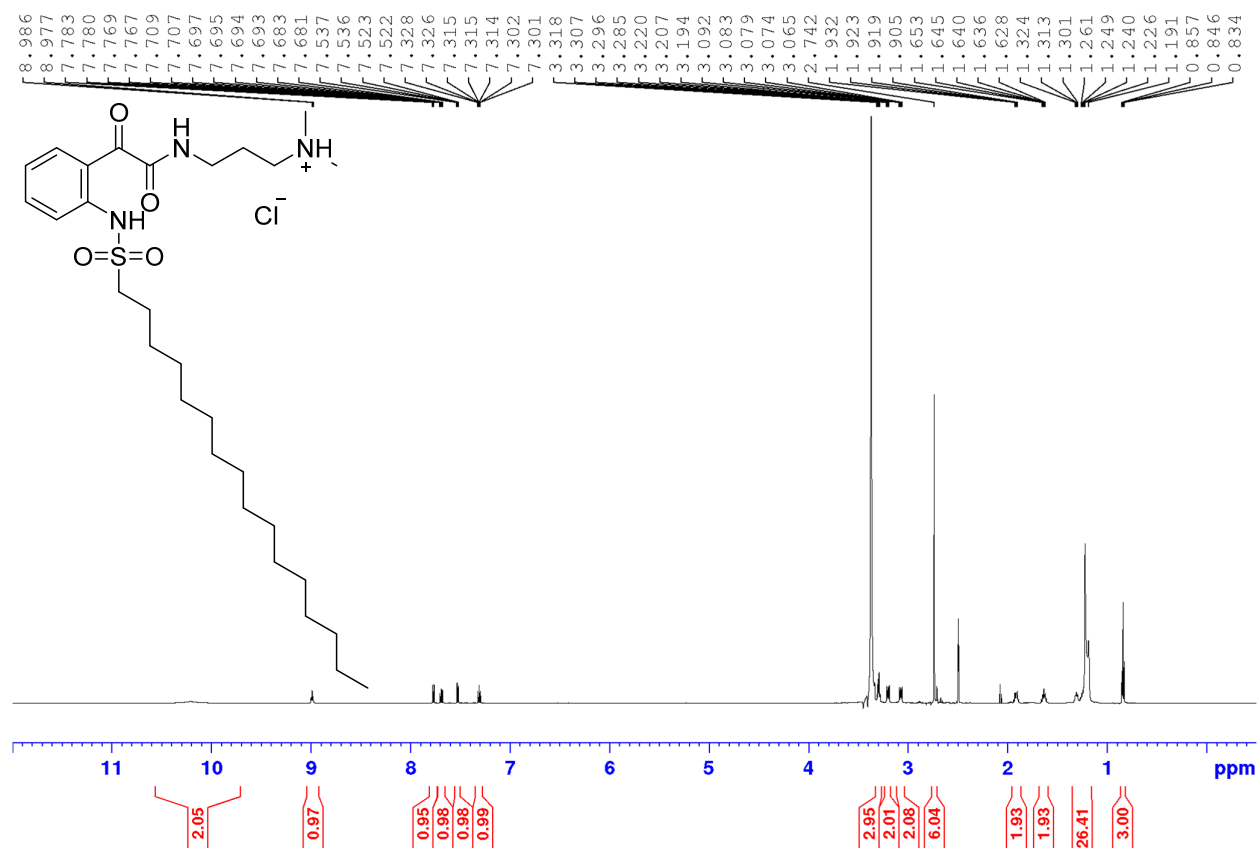

$^{13}\text{C}$  NMR (150 MHz,  $\text{DMSO}-d_6$ ):

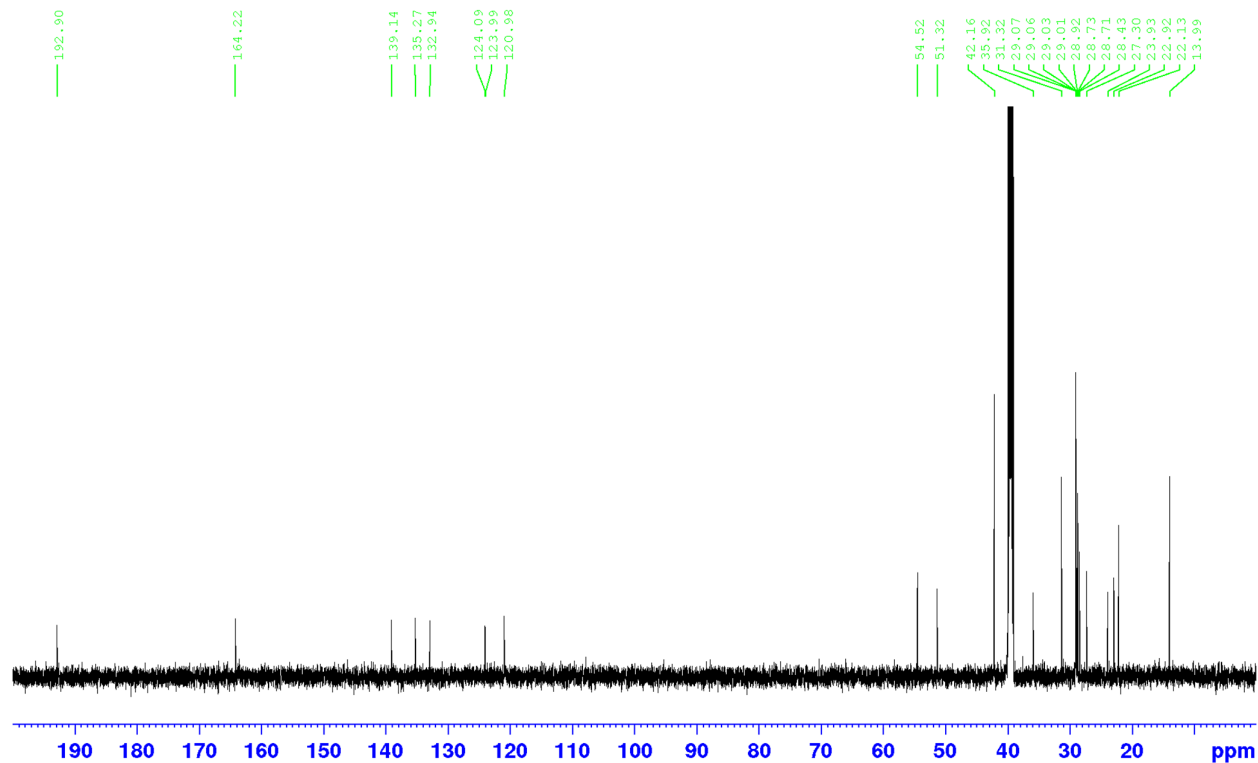

3-(2-(5-Bromo-2-(hexadecylsulfonamido)phenyl)-2-oxoacetamido)-*N,N*-dimethylpropan-1-aminium chloride (**15b**)

$^1\text{H}$  NMR (600 MHz,  $\text{DMSO}-d_6$ ):

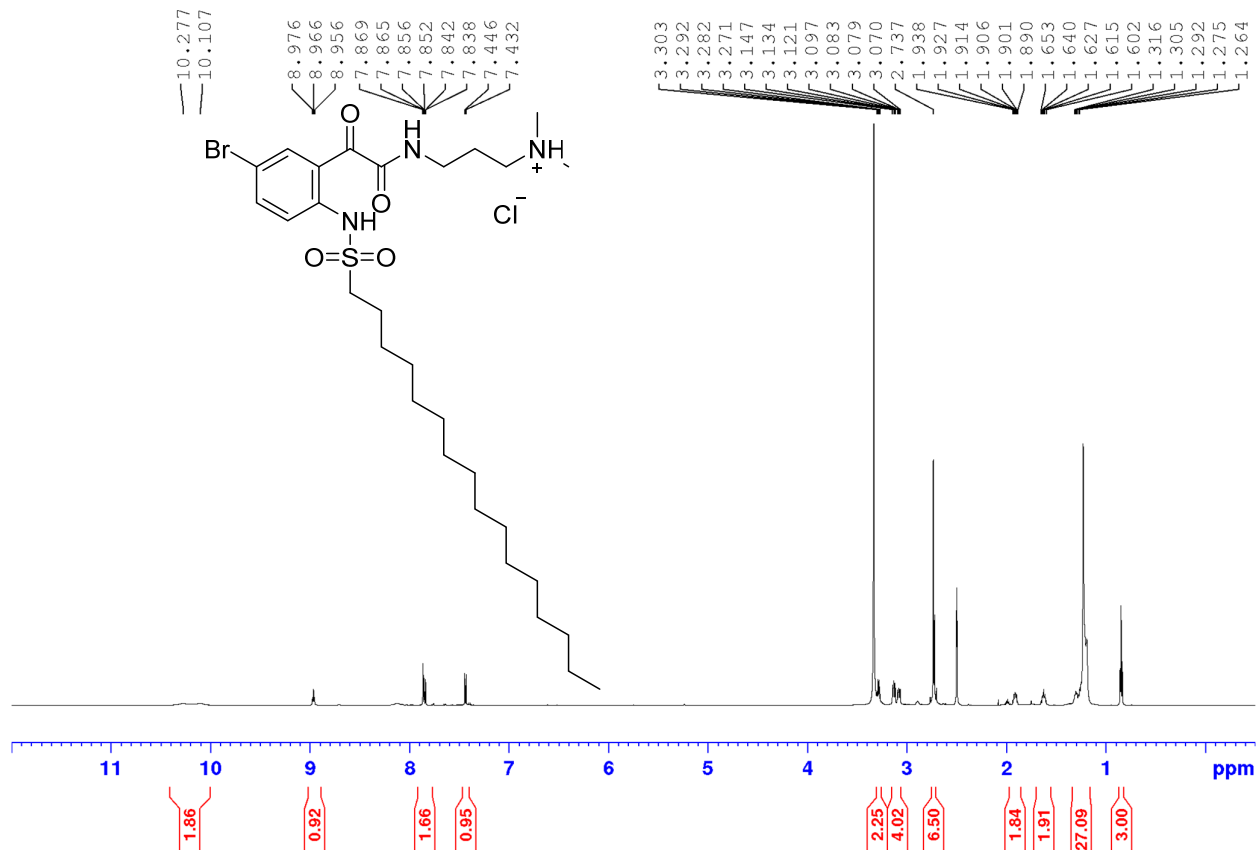

$^{13}\text{C}$  NMR (150 MHz,  $\text{DMSO}-d_6$ ):

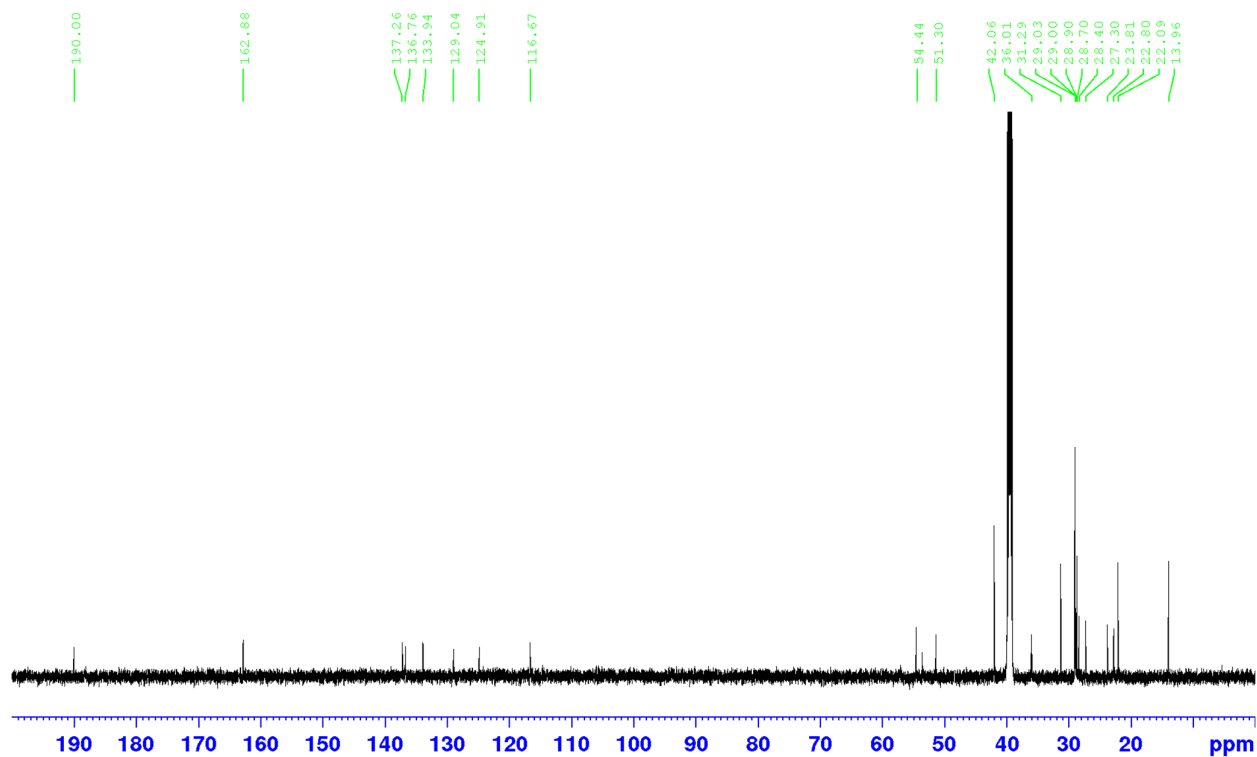



3-(2-(4-(Hexadecylsulfonamido)-[1,1'-biphenyl]-3-yl)-2-oxoacetamido)-*N,N*-dimethylpropan-1-aminium chloride (**15c**)

$^1\text{H}$  NMR (600 MHz,  $\text{DMSO}-d_6$ ):

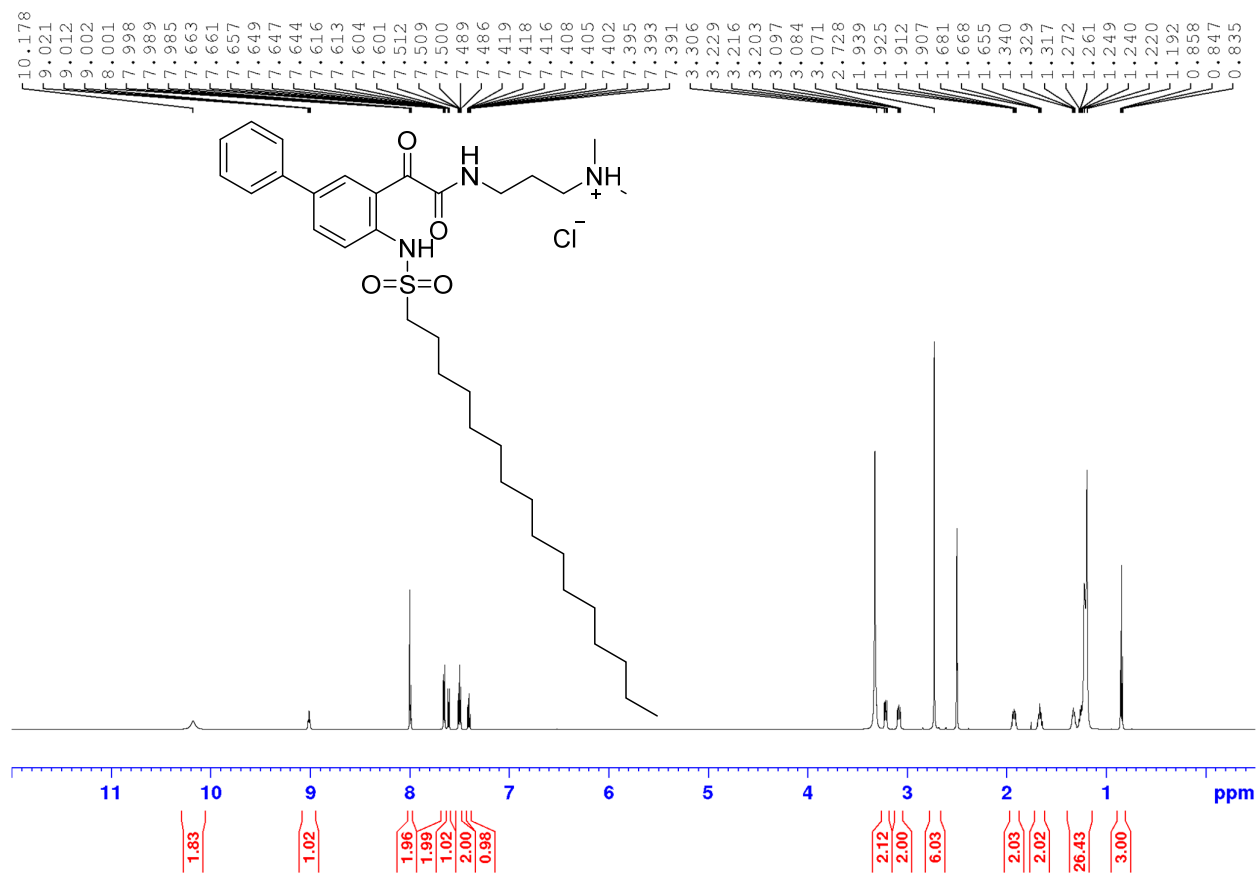

$^{13}\text{C}$  NMR (150 MHz,  $\text{DMSO}-d_6$ ):

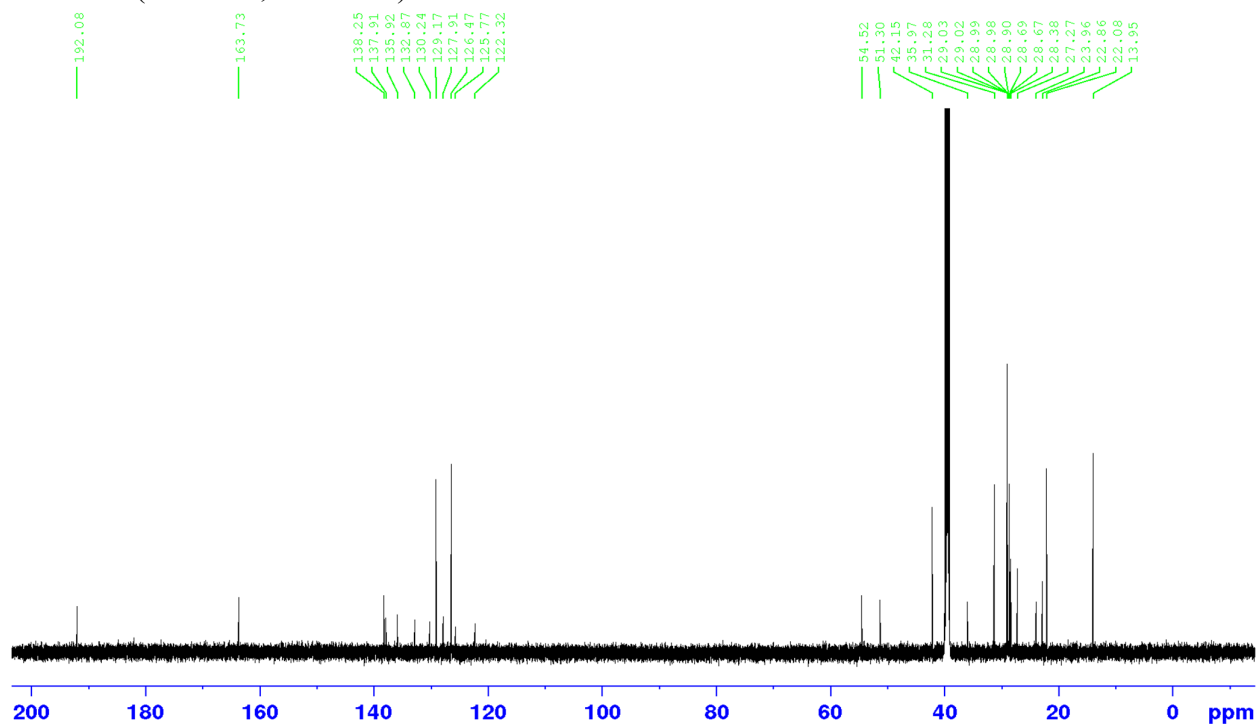

*N,N,N*-Trimethyl-3-(2-(4-(octylsulfonamido)-[1,1':4',1''-terphenyl]-3-yl)-2-oxoacetamido)propan-1-aminium iodide (**16d**)

$^1\text{H}$  NMR (600 MHz,  $\text{DMSO}-d_6$ ):

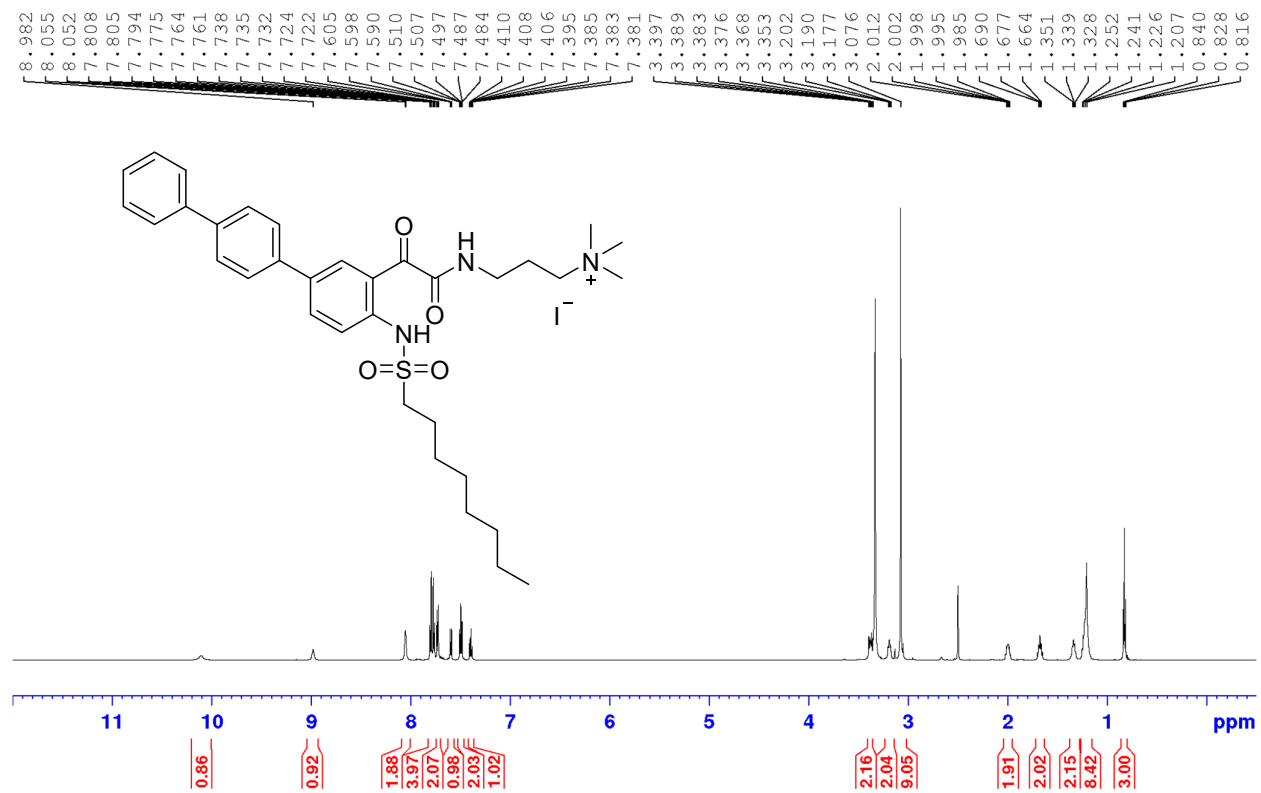

$^{13}\text{C}$  NMR (150 MHz,  $\text{DMSO}-d_6$ ):

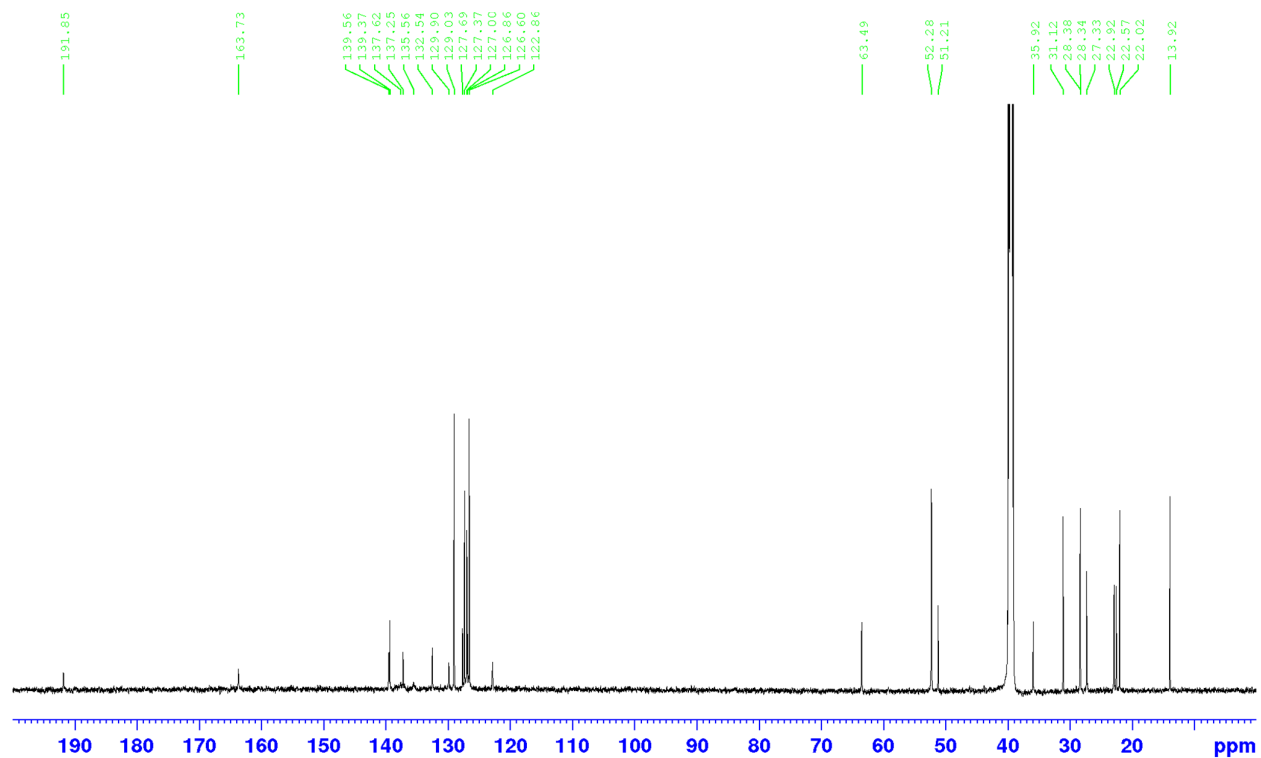

<sup>1</sup>H NMR (600 MHz, DMSO-*d*<sub>6</sub>):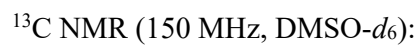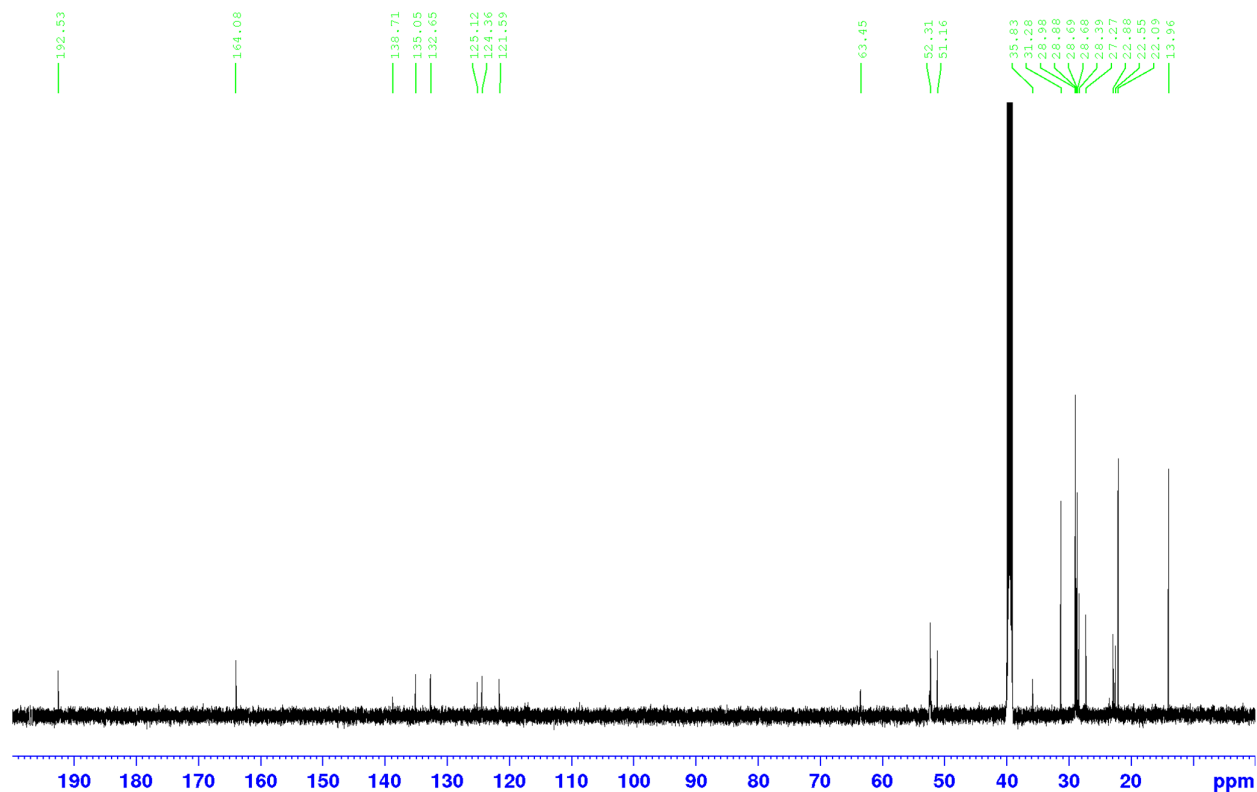

3-(2-(5-Bromo-2-(dodecylsulfonamido)phenyl)-2-oxoacetamido)-*N,N,N*-trimethylpropan-1-aminium iodide (**17b**)

$^1\text{H}$  NMR (600 MHz,  $\text{DMSO-}d_6$ ):

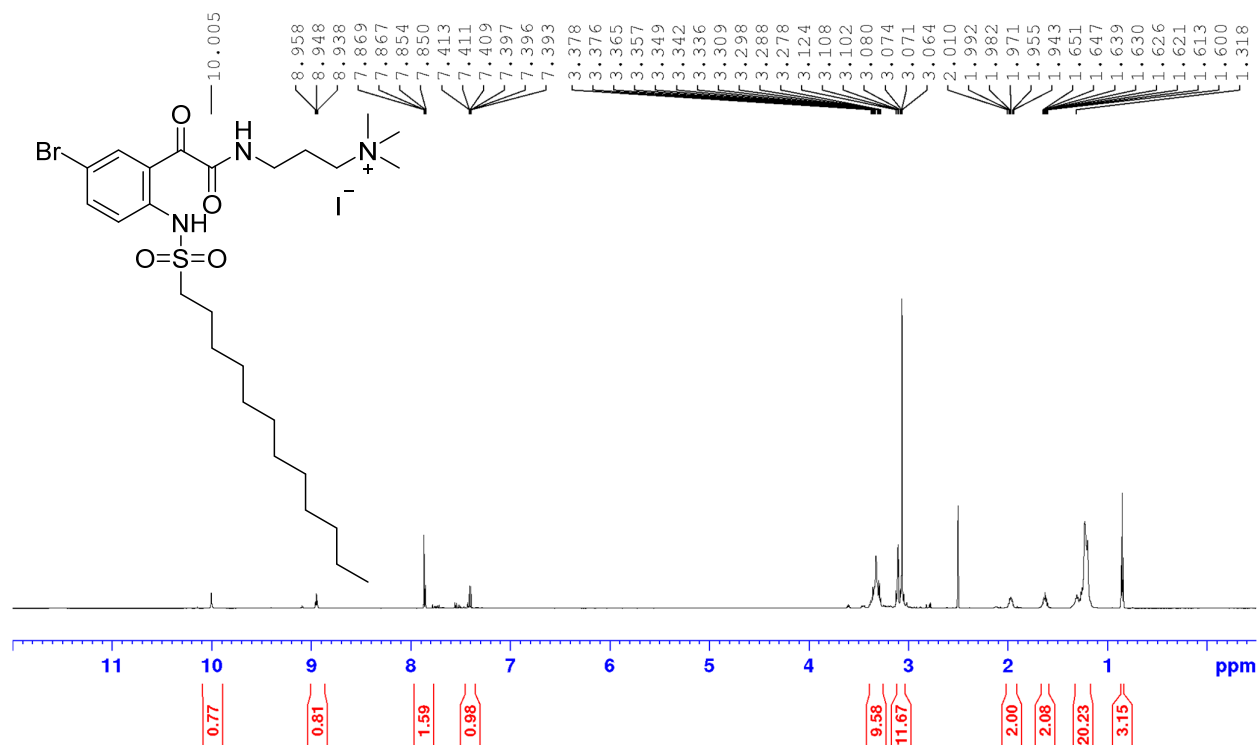

$^{13}\text{C}$  NMR (150 MHz,  $\text{DMSO-}d_6$ ):

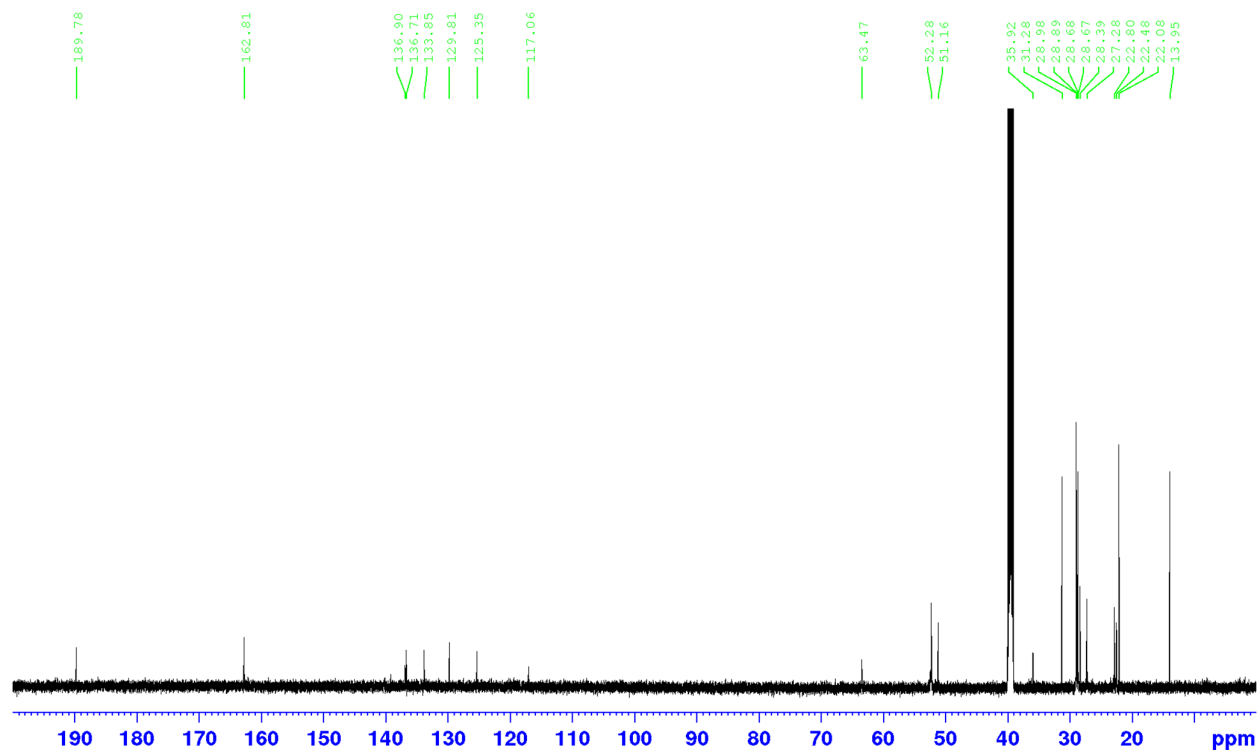

3-(2-(4-(Dodecylsulfonamido)-[1,1'-biphenyl]-3-yl)-2-oxoacetamido)-*N,N,N*-trimethylpropan-1-aminium iodide (**17c**)

$^1\text{H}$  NMR (600 MHz,  $\text{DMSO}-d_6$ ):

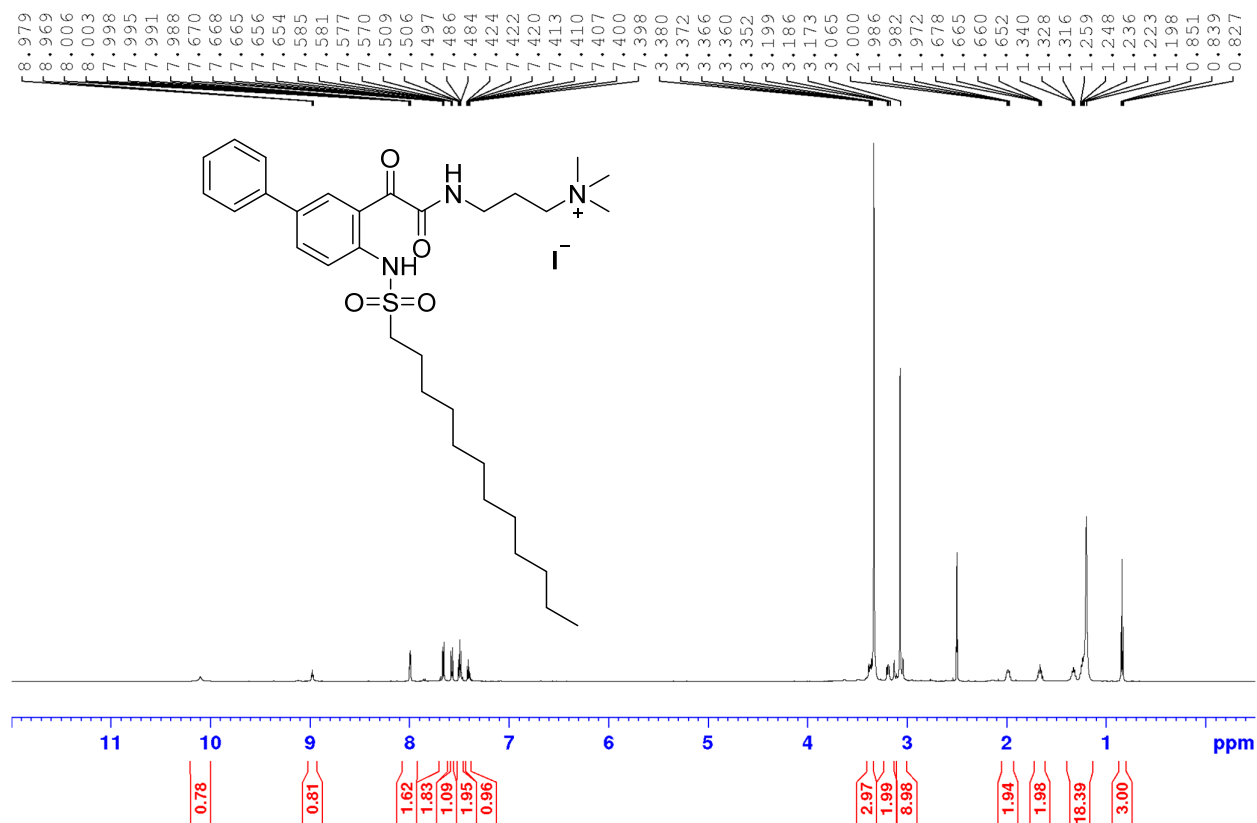

$^{13}\text{C}$  NMR (150 MHz,  $\text{DMSO}-d_6$ ):

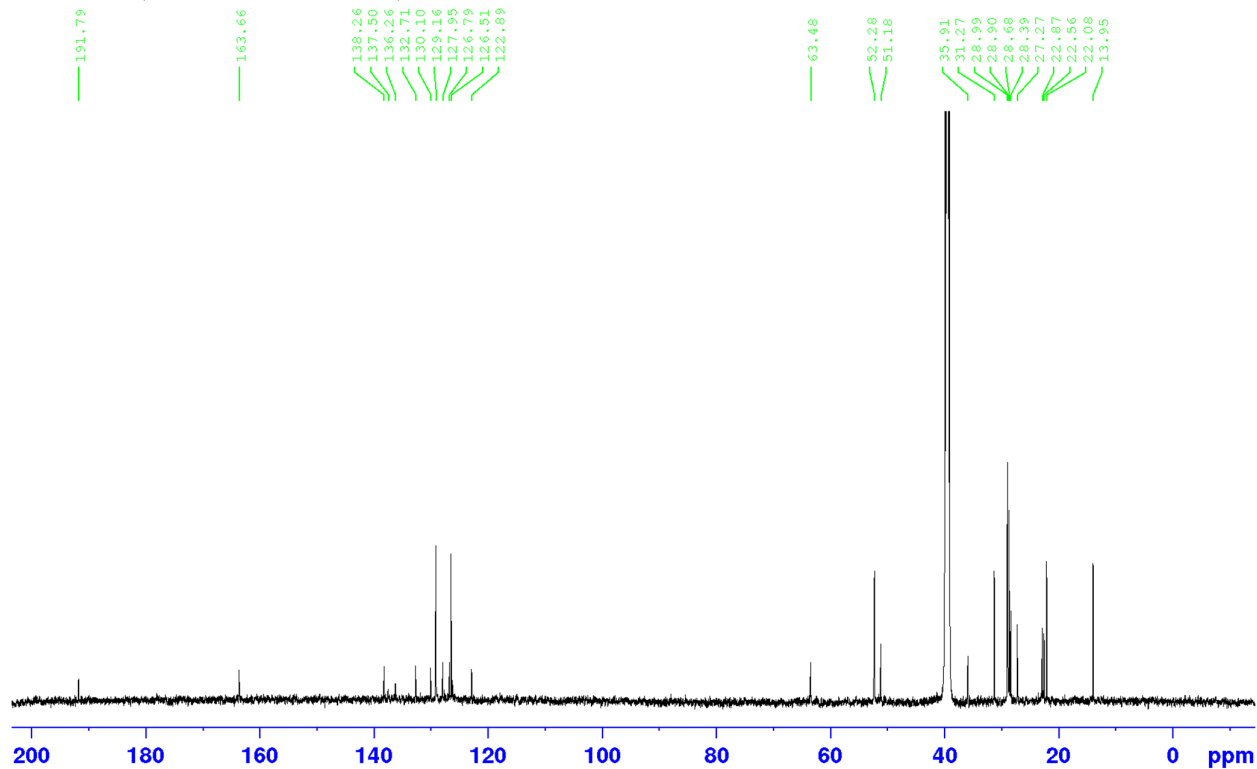

3-(2-(4-(Dodecylsulfonamido)-[1,1':4',1''-terphenyl]-3-yl)-2-oxoacetamido)-*N,N,N*-trimethylpropan-1-aminium iodide (**17d**)

$^1\text{H}$  NMR (600 MHz,  $\text{DMSO}-d_6$ ):

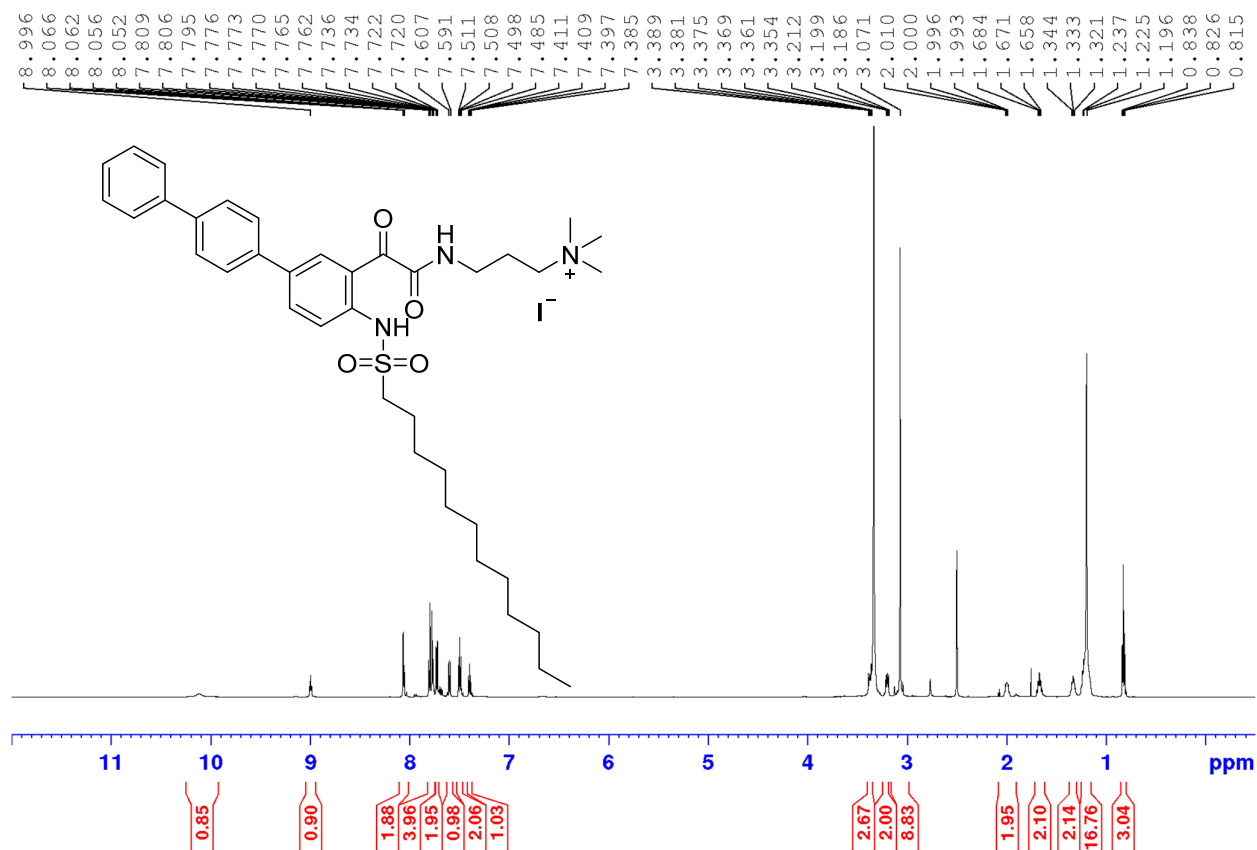

$^{13}\text{C}$  NMR (150 MHz,  $\text{DMSO}-d_6$ ):

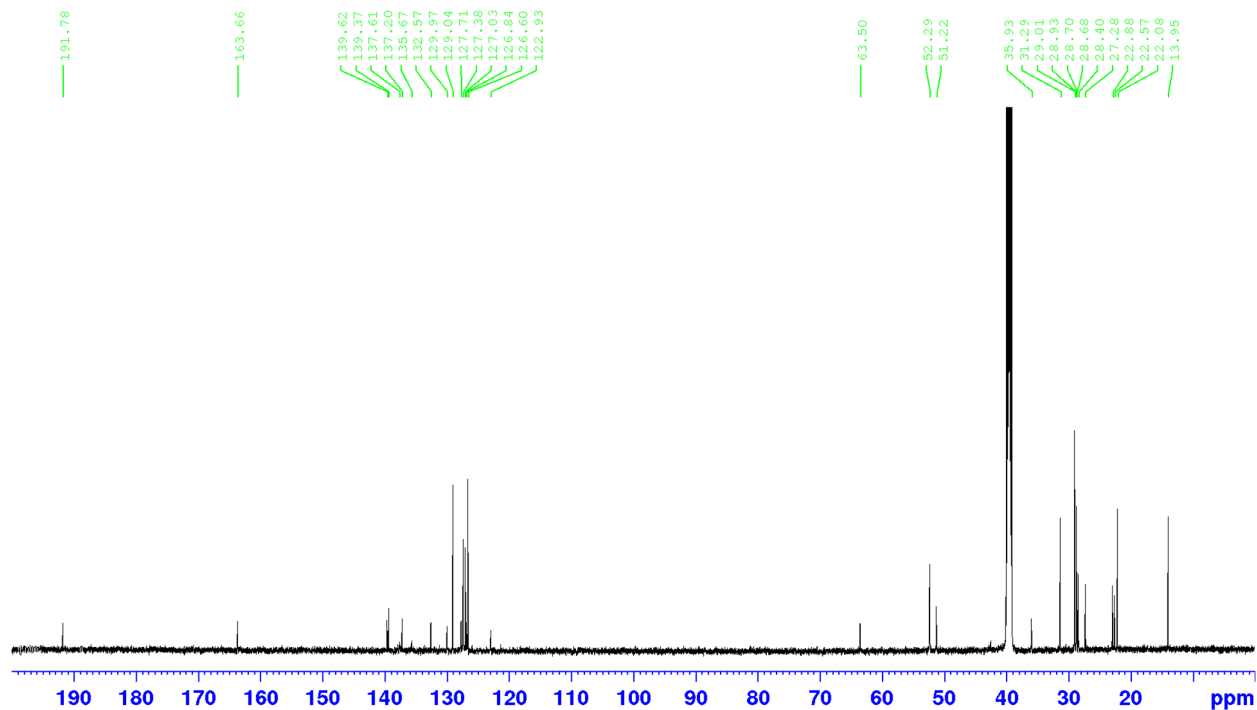

3-(2-(2-(Hexadecylsulfonamido)phenyl)-2-oxoacetamido)-*N,N,N*-trimethylpropan-1-aminium iodide  
(18a)

$^1\text{H}$  NMR (400 MHz,  $\text{DMSO-}d_6$ ):

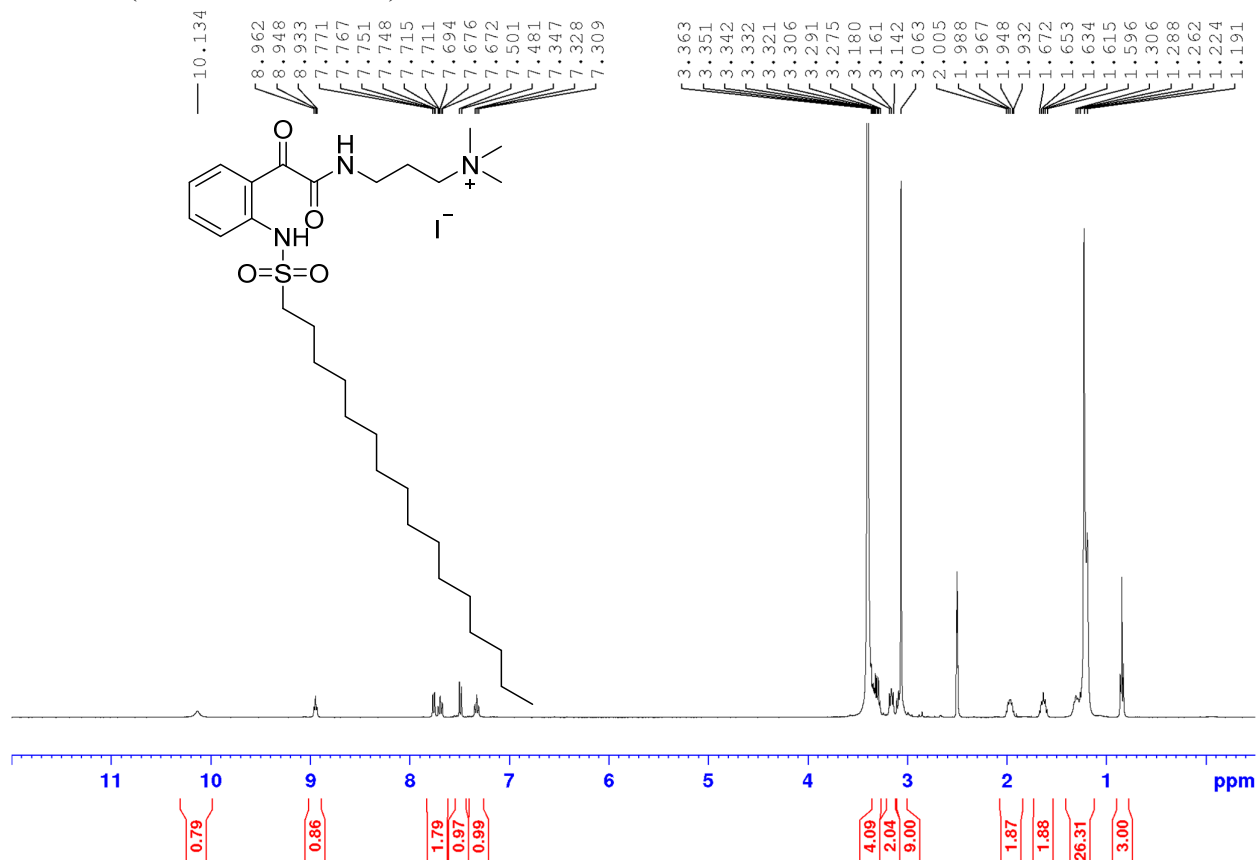

$^{13}\text{C}$  NMR (150 MHz,  $\text{DMSO-}d_6$ ):

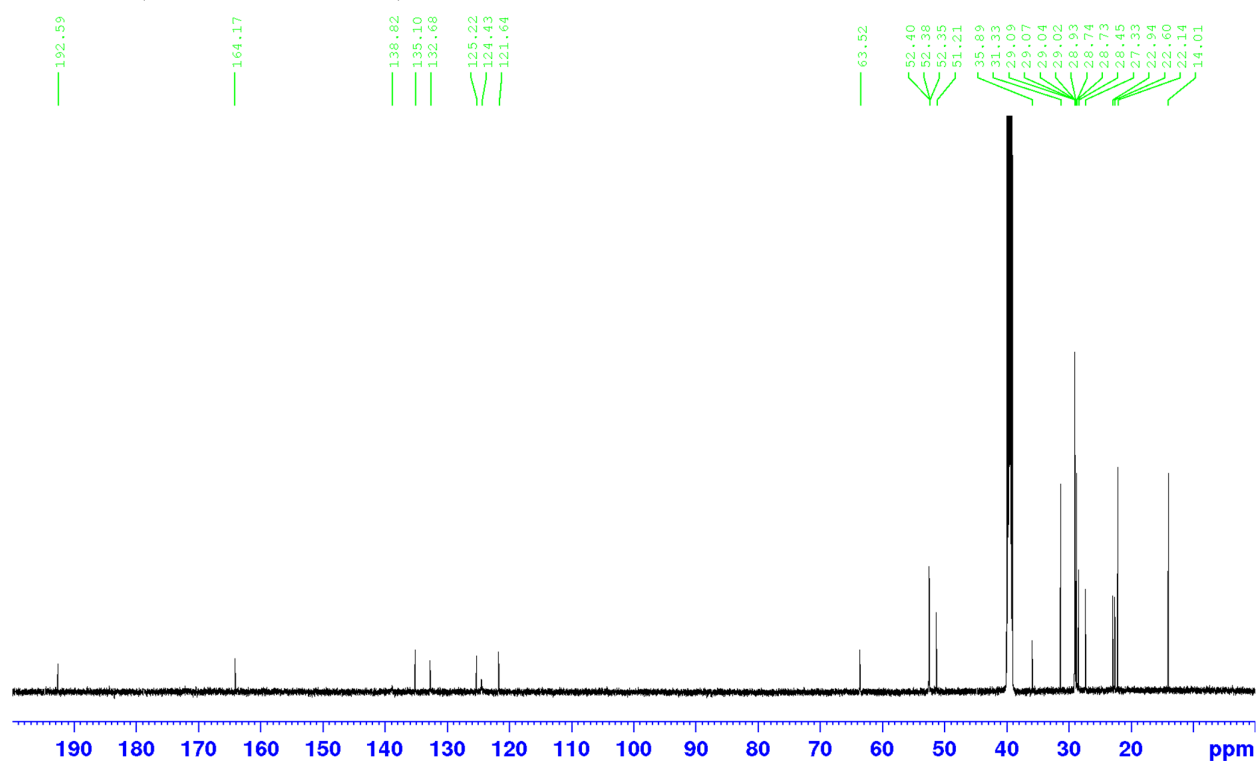

3-(2-(5-Bromo-2-(hexadecylsulfonamido)phenyl)-2-oxoacetamido)-*N,N,N*-trimethylpropan-1-aminium iodide (**18b**)

$^1\text{H}$  NMR (600 MHz,  $\text{DMSO}-d_6$ ):

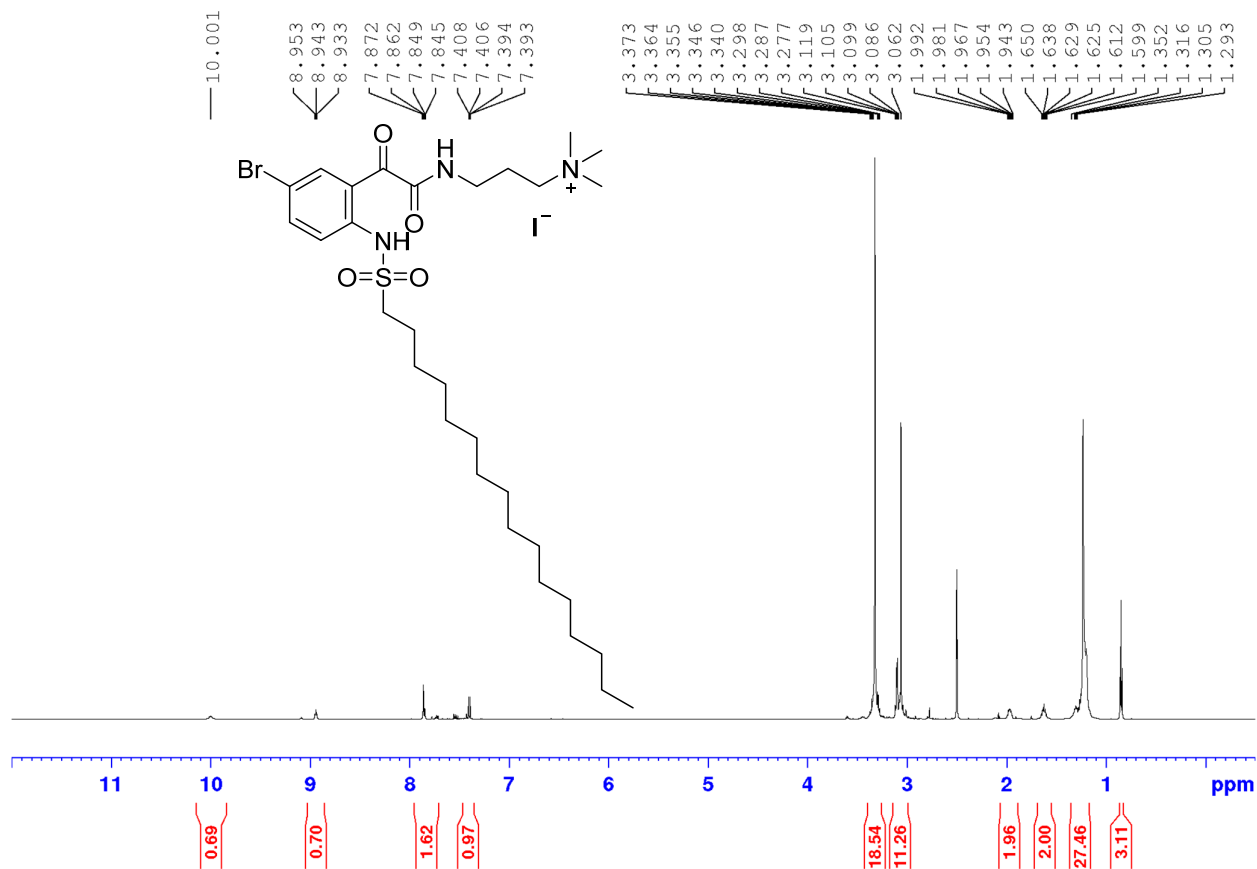

$^{13}\text{C}$  NMR (150 MHz,  $\text{DMSO}-d_6$ ):

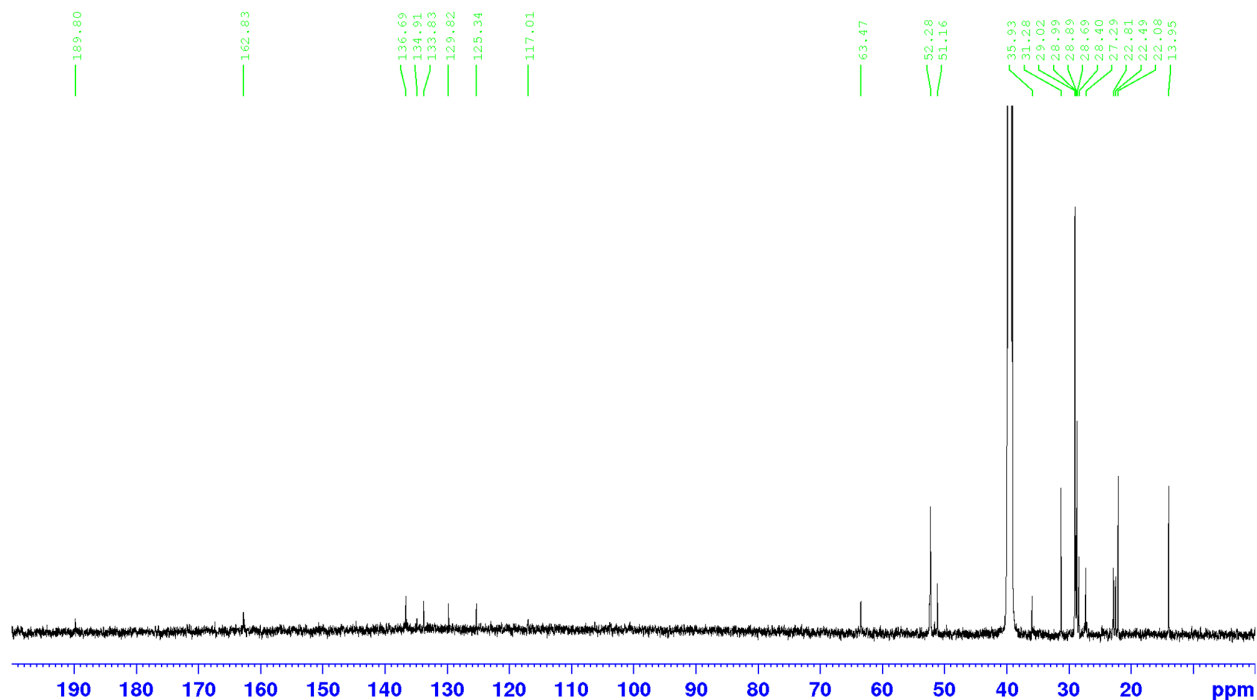



3-(2-(4-(Hexadecylsulfonamido)-[1,1'-biphenyl]-3-yl)-2-oxoacetamido)-*N,N,N*-trimethylpropan-1-aminium iodide (**18c**)

$^1\text{H}$  NMR (600 MHz,  $\text{DMSO}-d_6$ ):

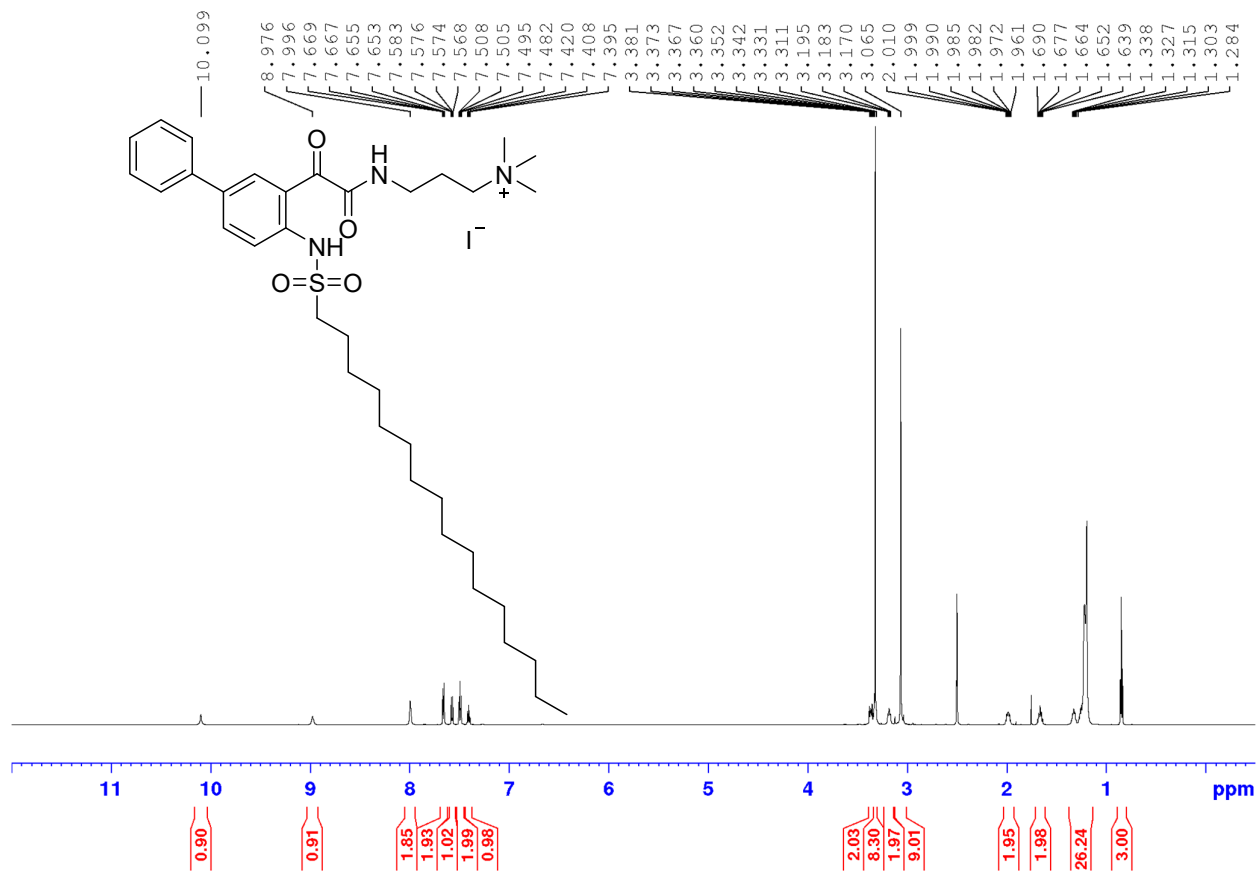

$^{13}\text{C}$  NMR (150 MHz,  $\text{DMSO}-d_6$ ):

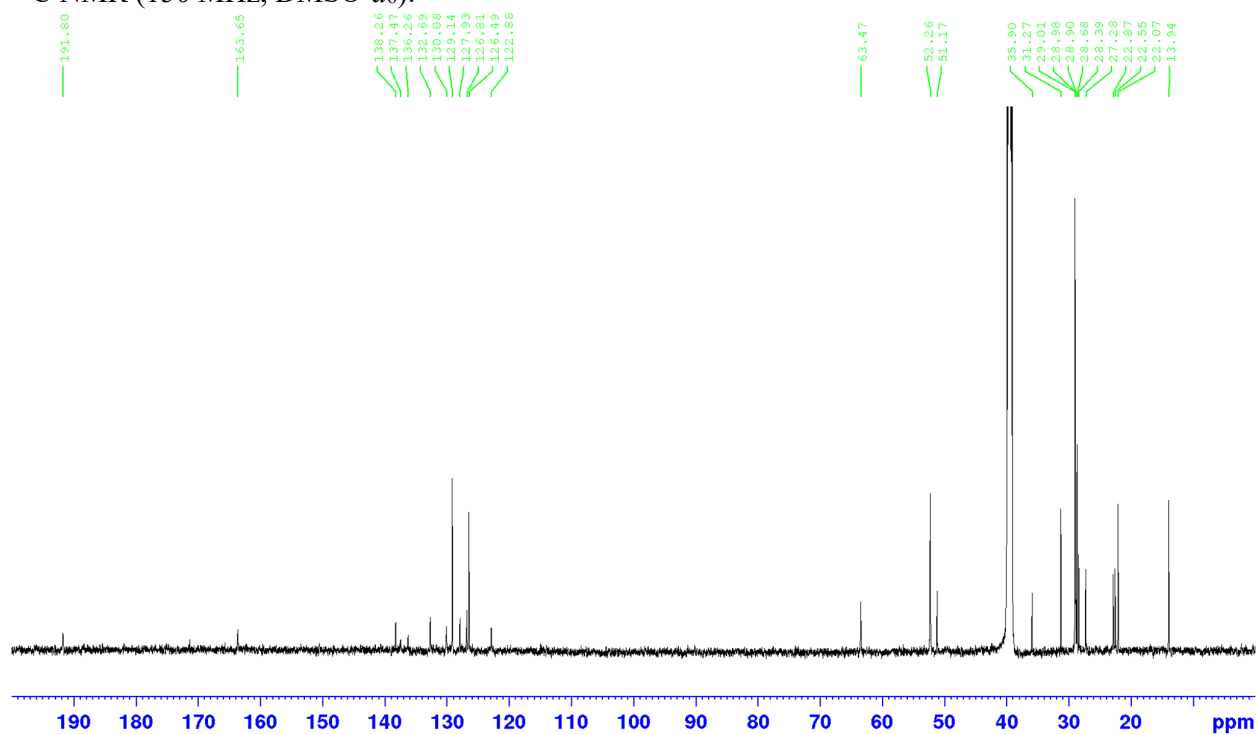

5-([1,1'-Biphenyl]-3-yl)indoline-2,3-dione (**19**)

$^1\text{H}$  NMR (400 MHz,  $\text{DMSO}-d_6$ ):

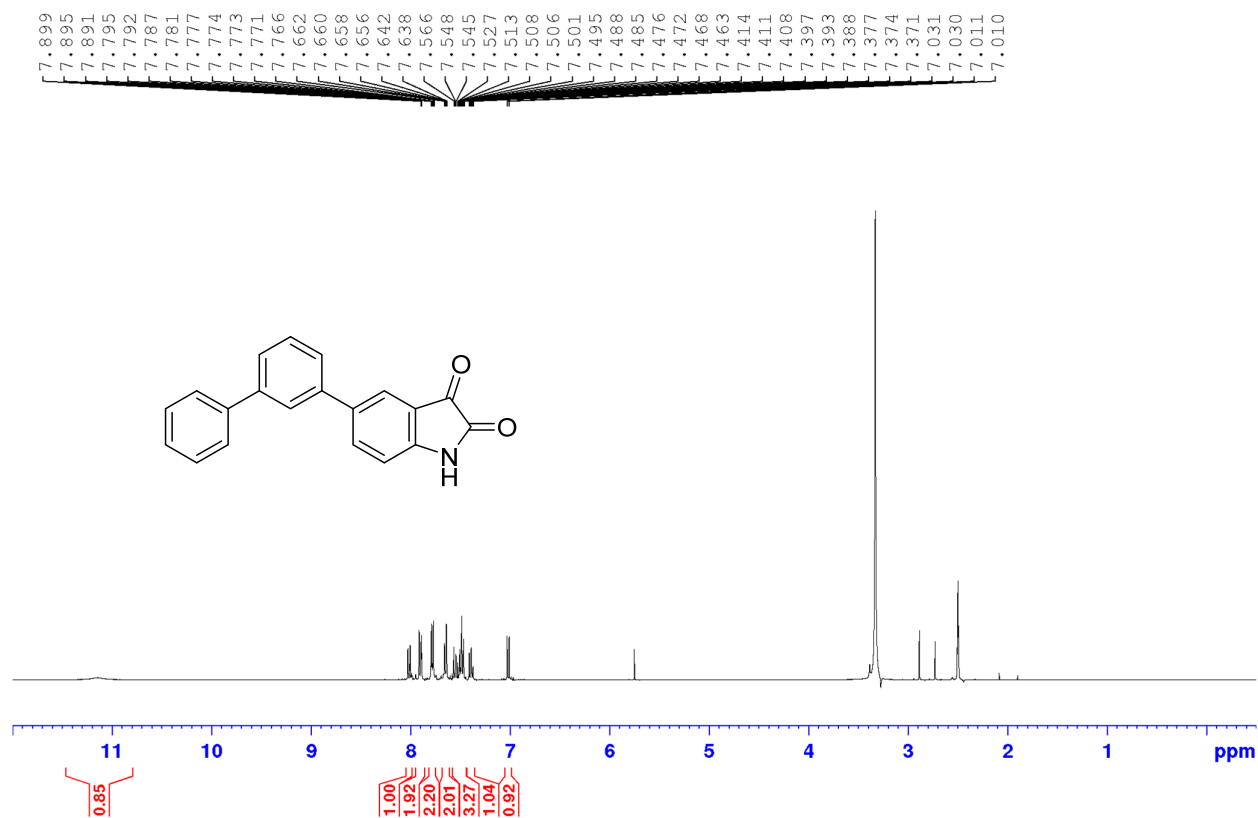

5-([1,1'-Biphenyl]-3-yl)-1-(octylsulfonyl)indoline-2,3-dione (**20**)

$^1\text{H}$  NMR (400 MHz,  $\text{DMSO}-d_6$ ):

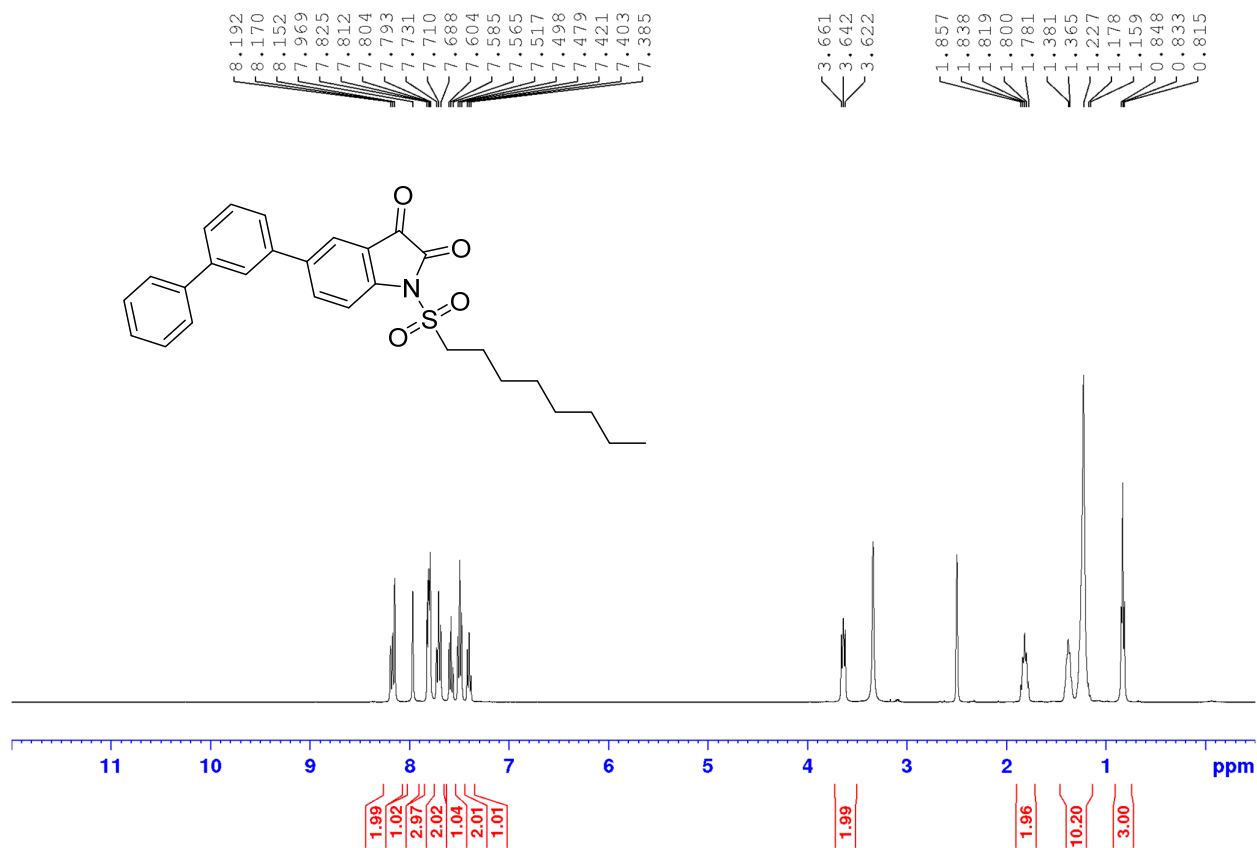

$^{13}\text{C}$  NMR (100 MHz,  $\text{DMSO}-d_6$ ):

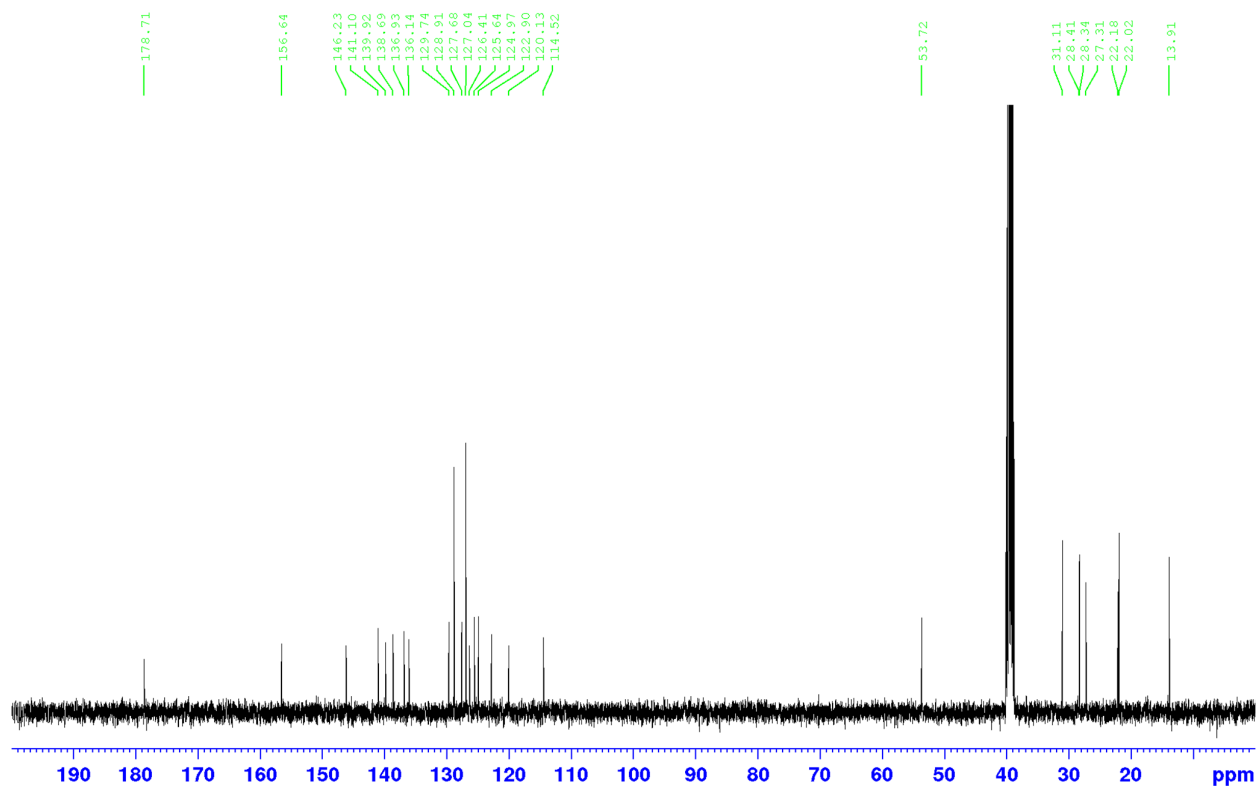

*N*-(3-(Dimethylamino)propyl)-2-(4-(octylsulfonamido)-[1,1':3',1''-terphenyl]-3-yl)-2-oxoacetamide  
(21)

$^1\text{H}$  NMR (400 MHz,  $\text{CDCl}_3$ ):

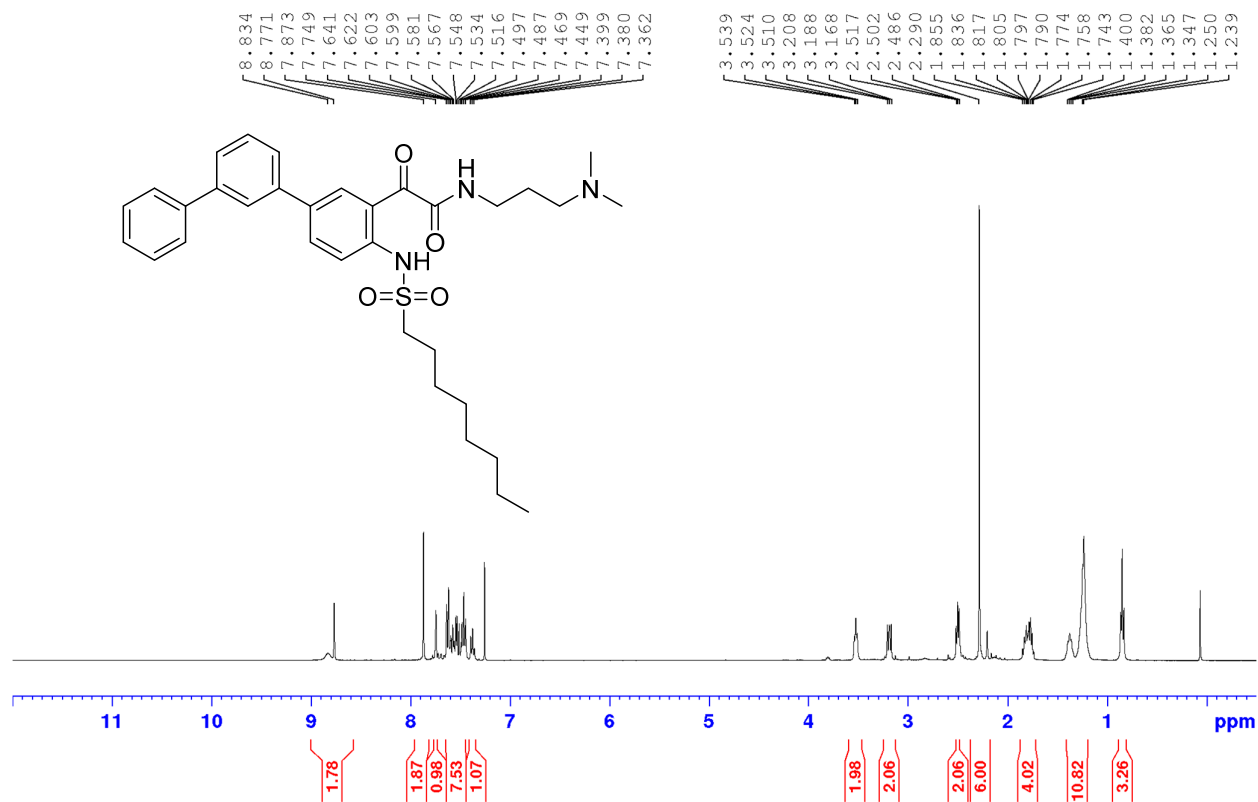

$^{13}\text{C}$  NMR (100 MHz,  $\text{CDCl}_3$ ):

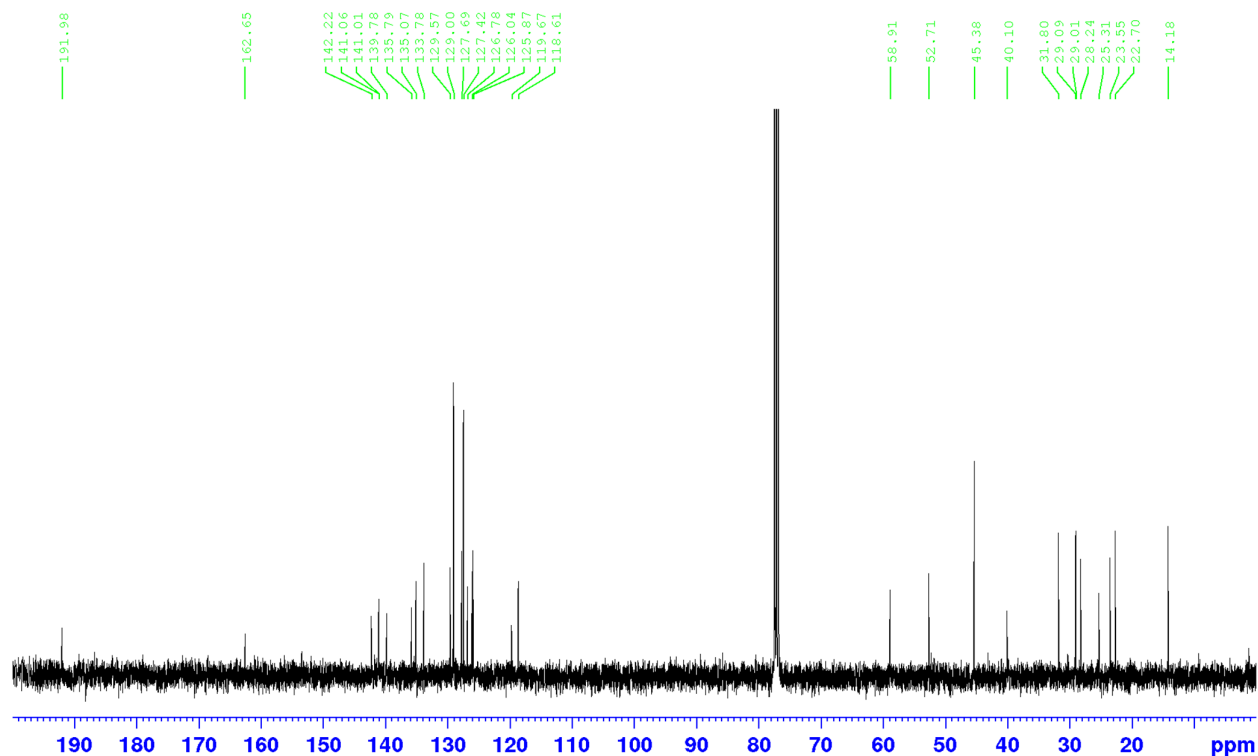

*N,N*-Dimethyl-3-(2-(4-(octylsulfonamido)-[1,1':3',1''-terphenyl]-3-yl)-2-oxoacetamido)propan-1-aminium chloride (**22**)

$^1\text{H}$  NMR (600 MHz,  $\text{DMSO-}d_6$ ):

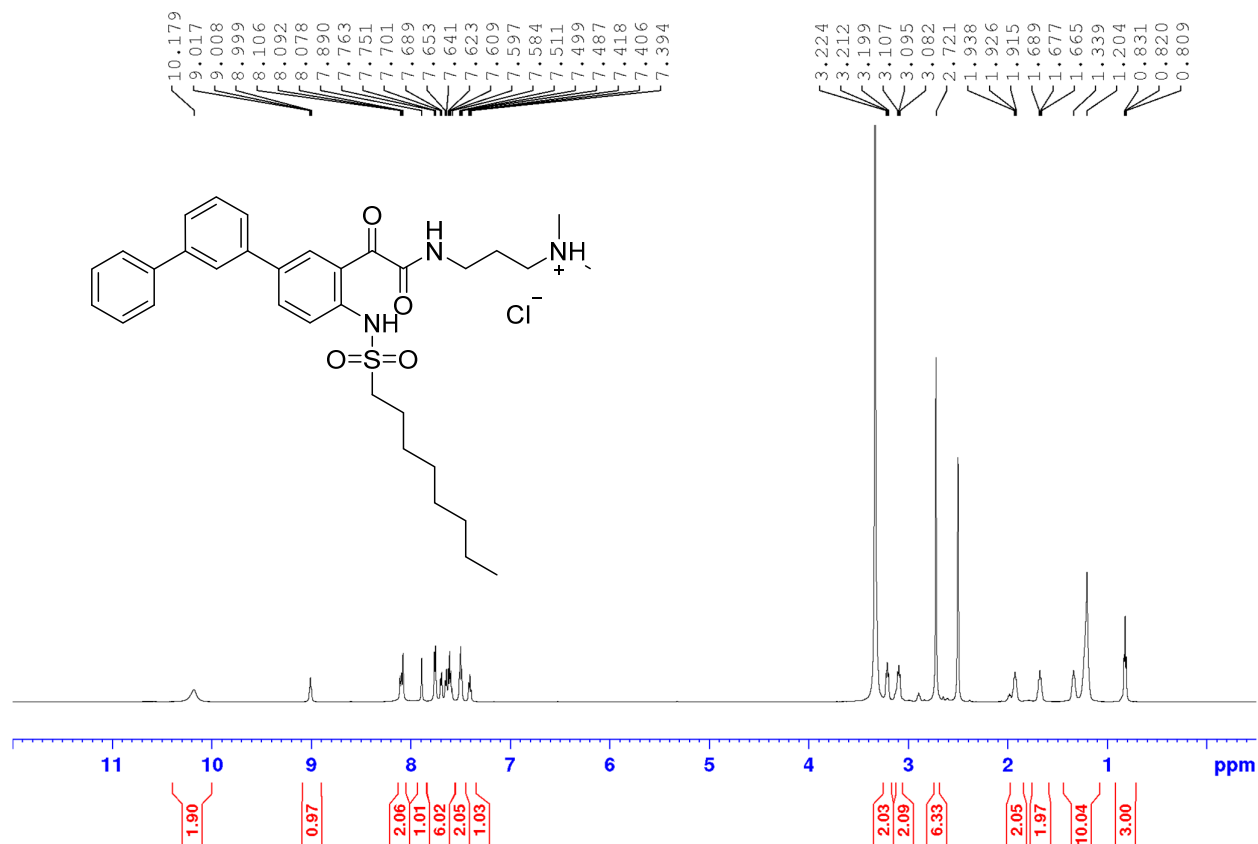

$^{13}\text{C}$  NMR (150 MHz,  $\text{DMSO-}d_6$ ):

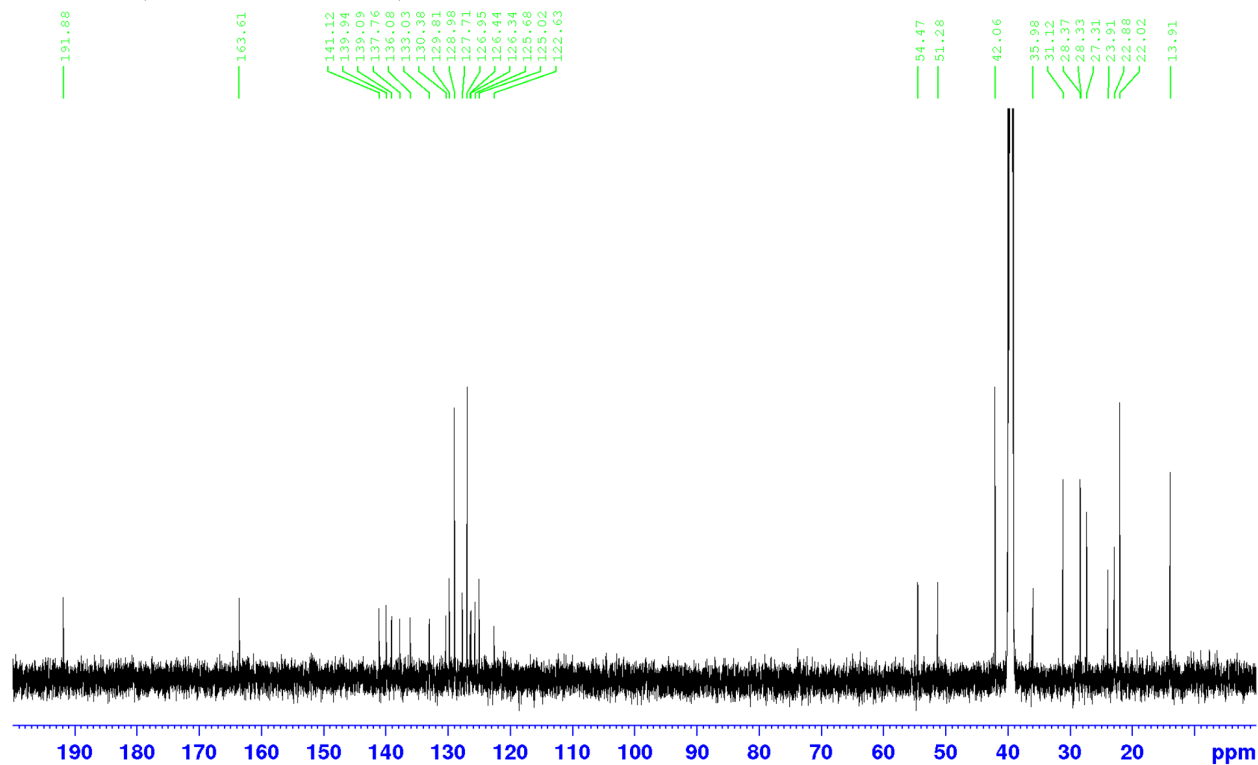

*N,N,N*-Trimethyl-3-(2-(4-(octylsulfonamido)-[1,1':3',1''-terphenyl]-3-yl)-2-oxoacetamido)propan-1-aminium iodide (**23**)

$^1\text{H}$  NMR (600 MHz,  $\text{DMSO}-d_6$ ):

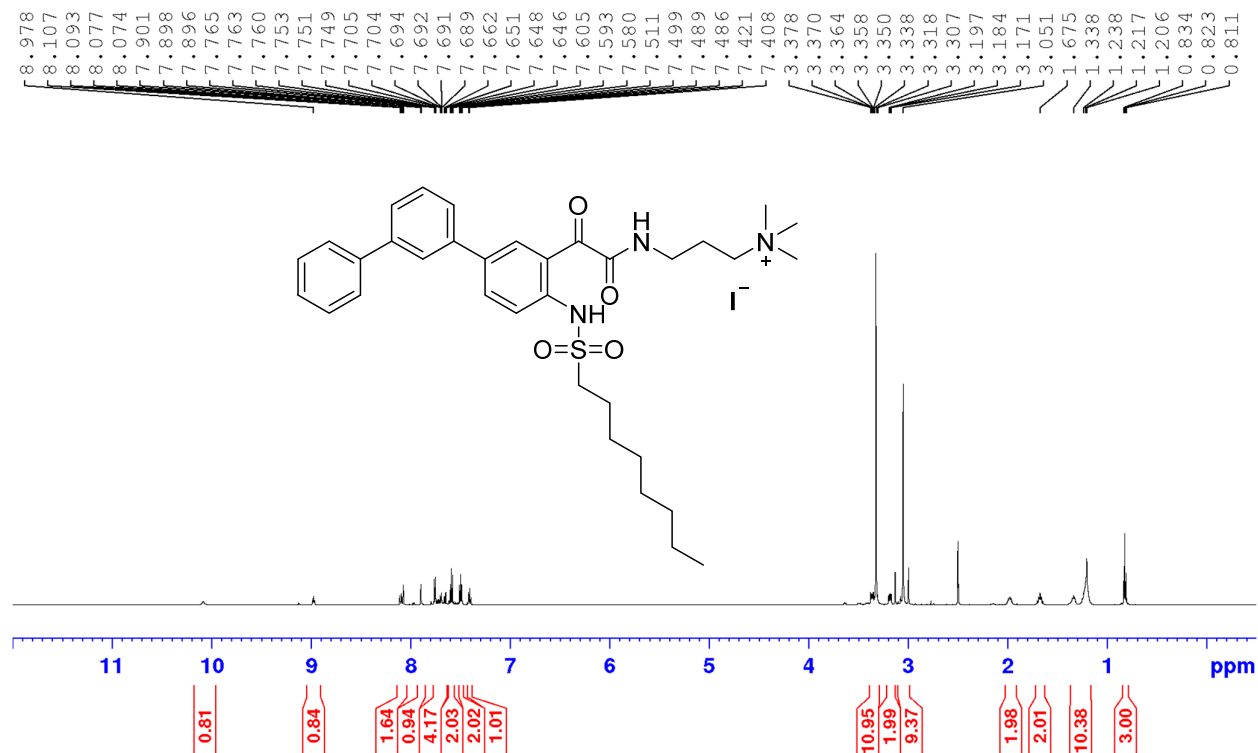

$^{13}\text{C}$  NMR (150 MHz,  $\text{DMSO}-d_6$ ):

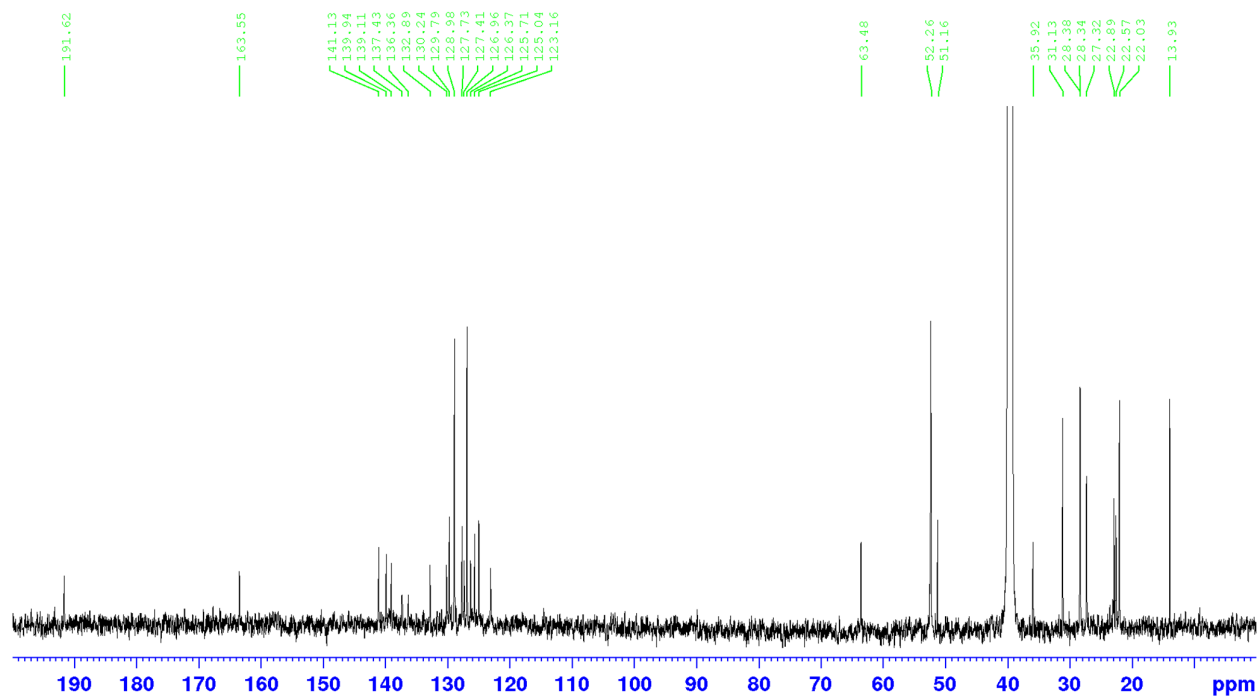

*tert*-Butyl (3-(2-(4-(octylsulfonamido)-[1,1':4',1''-terphenyl]-3-yl)-2-oxoacetamido)propyl)carbamate  
(**24d**)

$^1\text{H}$  NMR (400 MHz,  $\text{CDCl}_3$ ):

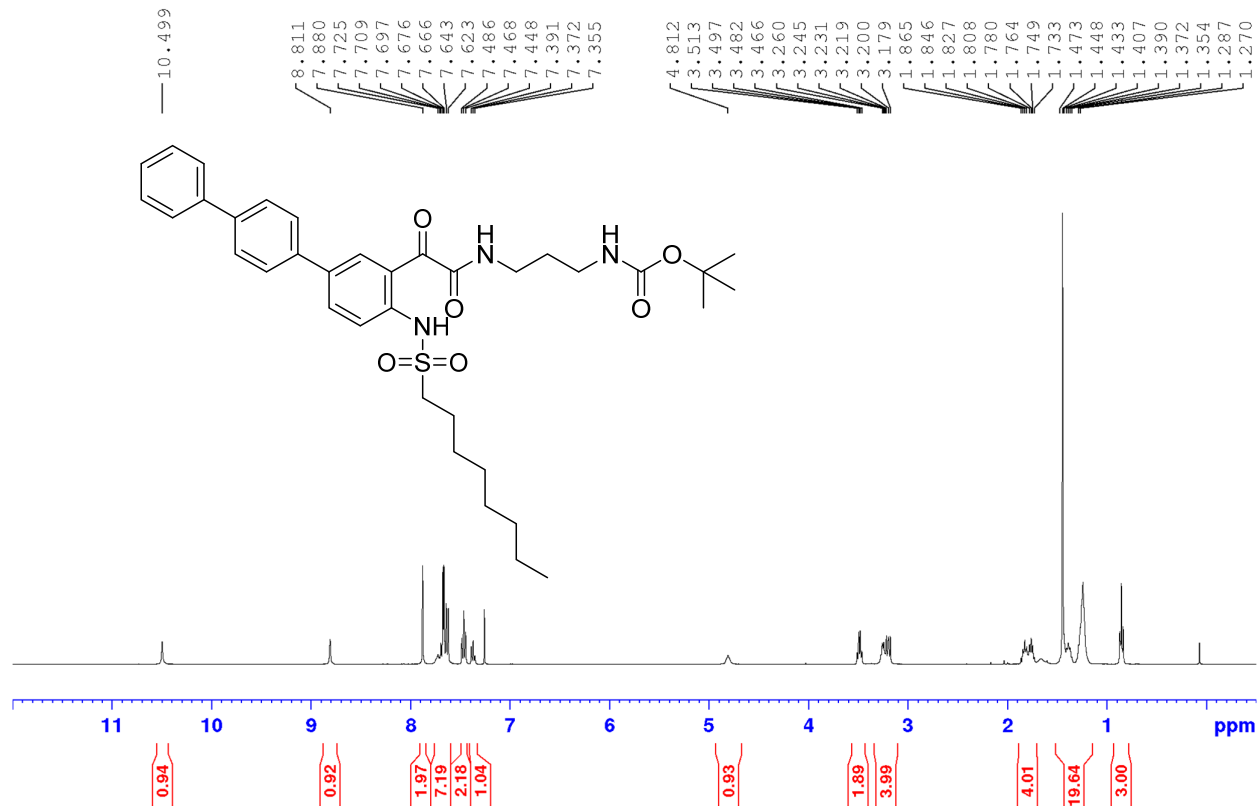

$^{13}\text{C}$  NMR (100 MHz,  $\text{CDCl}_3$ ):

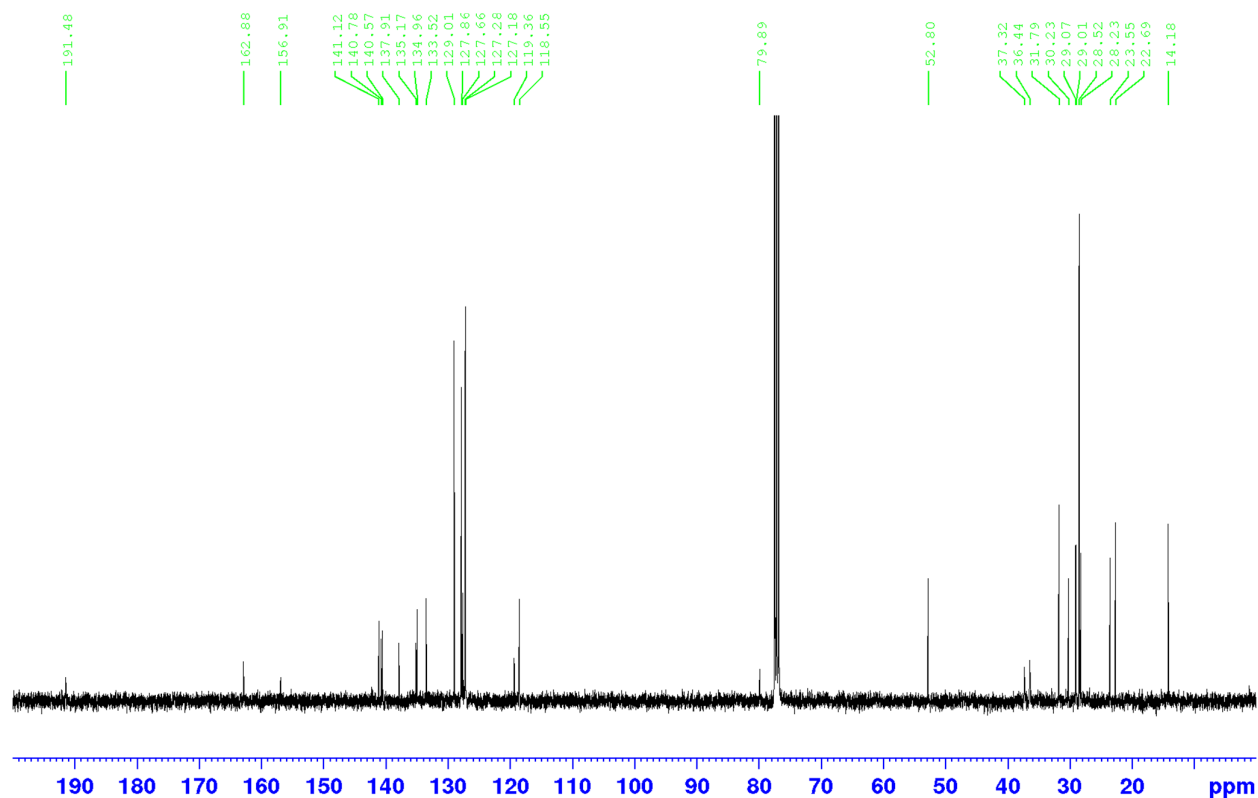

*tert*-Butyl (3-(2-(2-(dodecylsulfonamido)phenyl)-2-oxoacetamido)propyl)carbamate (**25a**)

$^1\text{H}$  NMR (400 MHz,  $\text{CDCl}_3$ ):

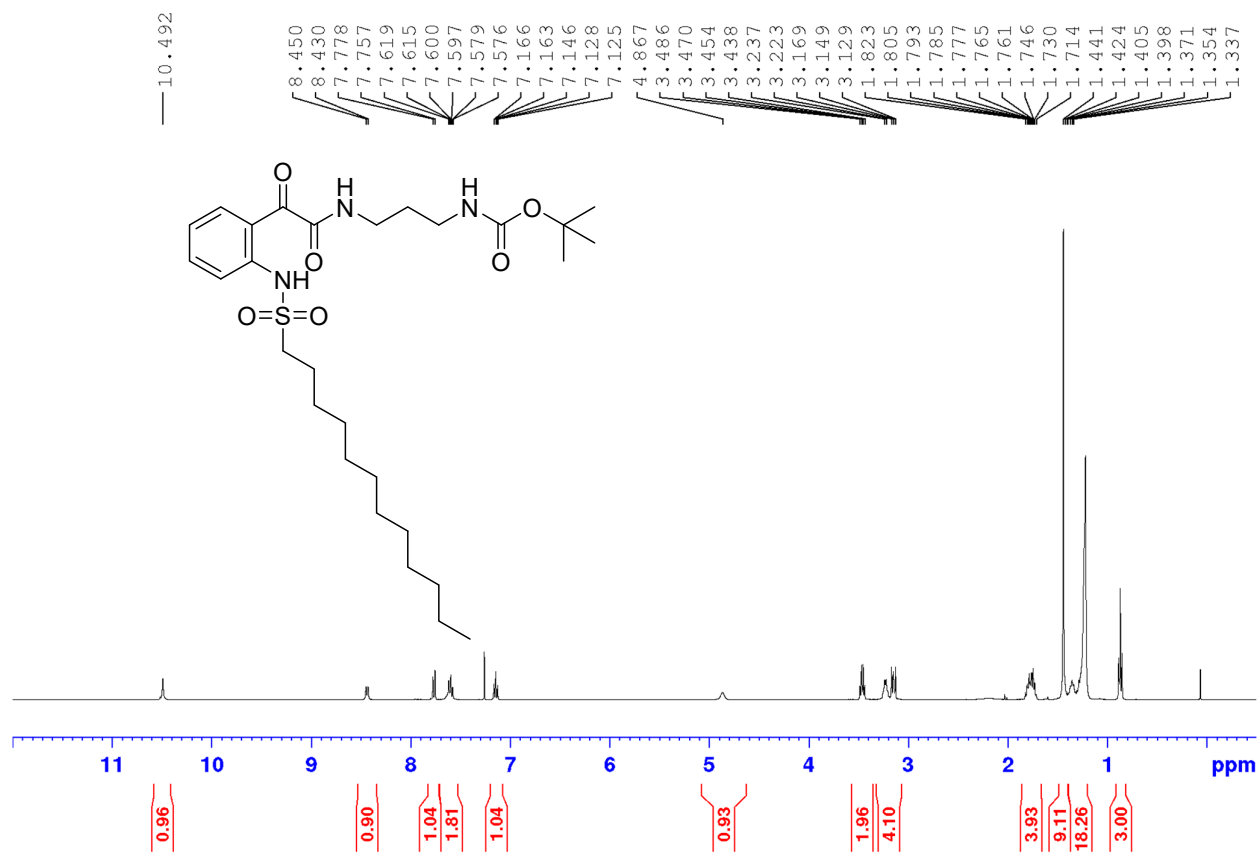

$^{13}\text{C}$  NMR (100 MHz,  $\text{CDCl}_3$ ):

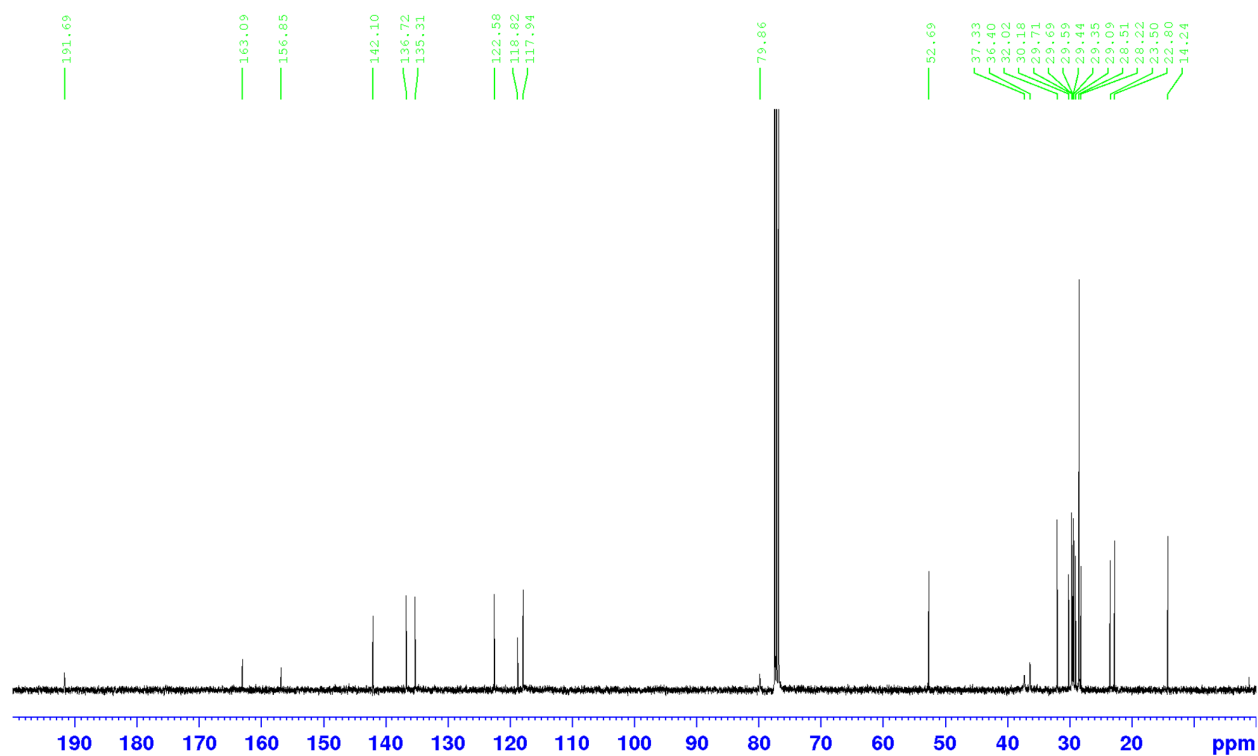



*tert*-Butyl (3-(2-(5-bromo-2-(dodecylsulfonamido)phenyl)-2-oxoacetamido)propyl)carbamate (**25b**)

$^1\text{H}$  NMR (400 MHz,  $\text{CDCl}_3$ ):

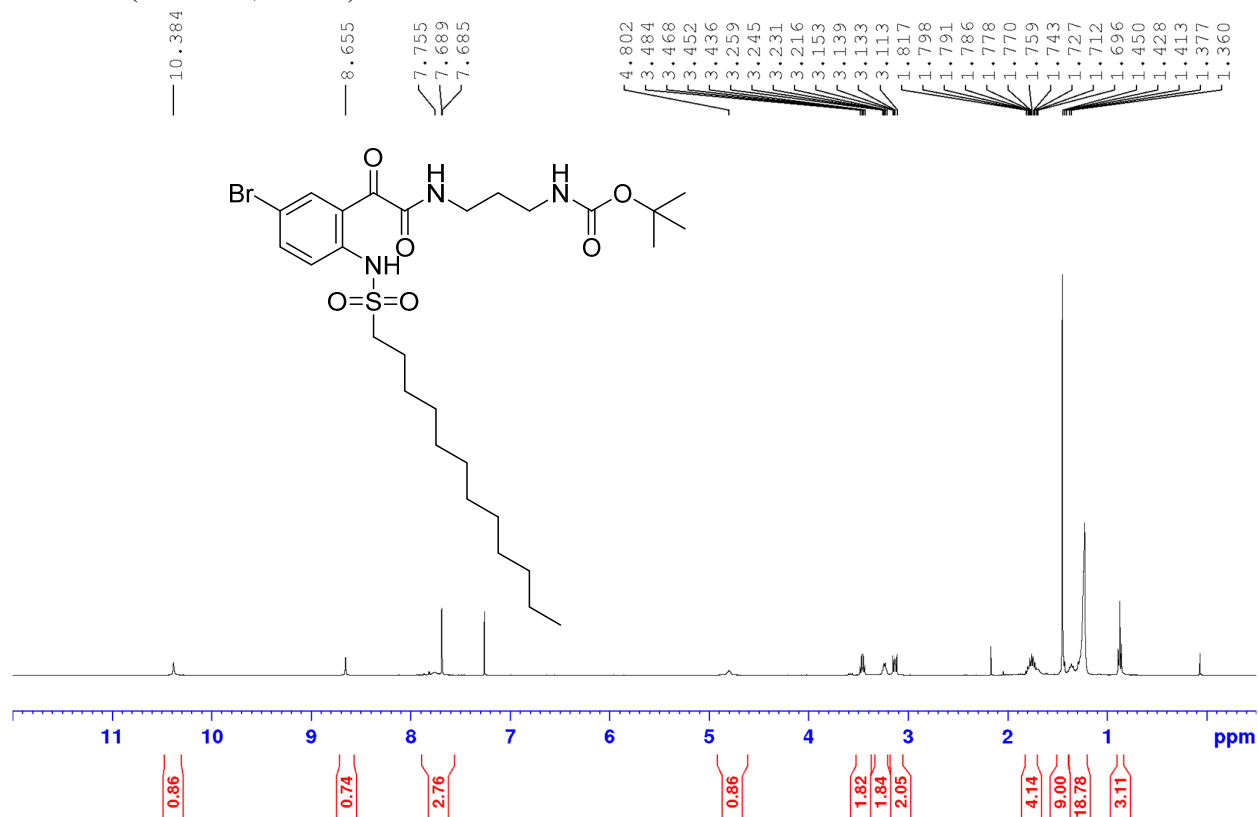

$^{13}\text{C}$  NMR (100 MHz,  $\text{CDCl}_3$ ):

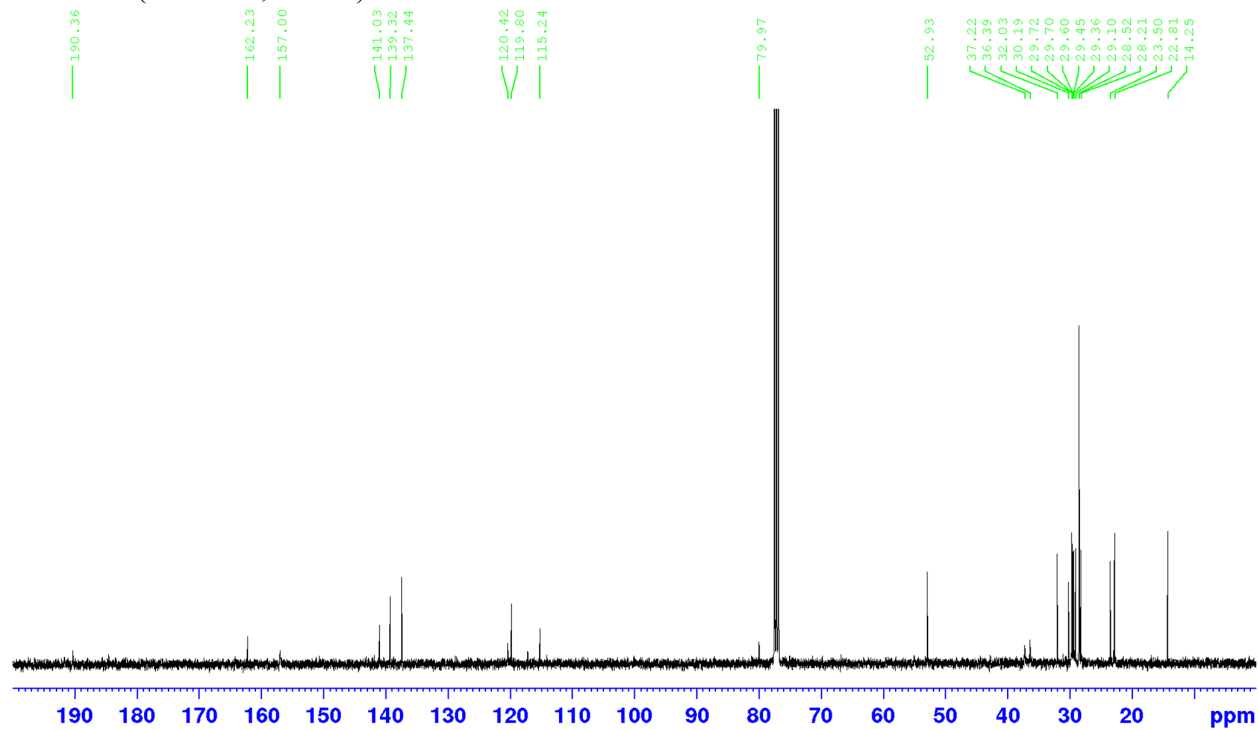

*tert*-Butyl (3-(2-(4-(dodecylsulfonamido)-[1,1'-biphenyl]-3-yl)-2-oxoacetamido)propyl)carbamate  
(25c)

<sup>1</sup>H NMR (400 MHz, CDCl<sub>3</sub>):

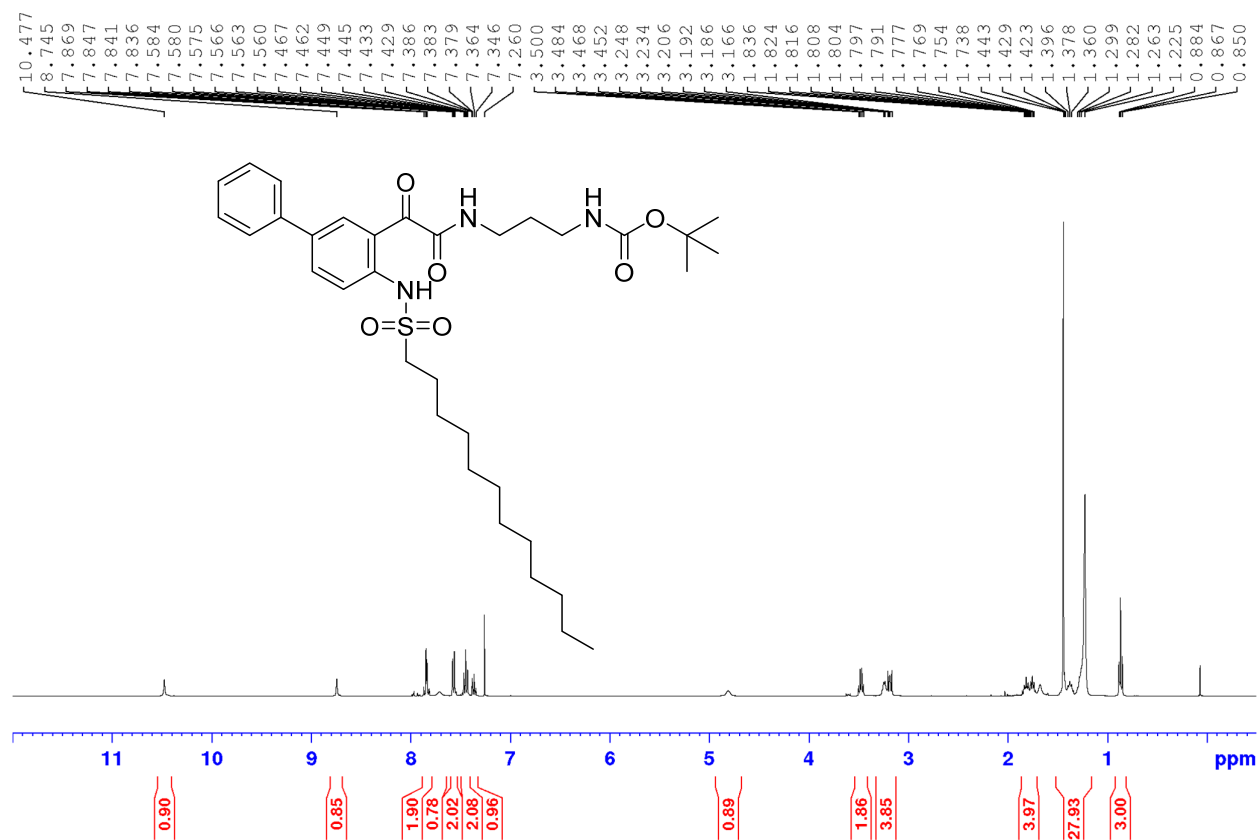

<sup>13</sup>C NMR (100 MHz, CDCl<sub>3</sub>):

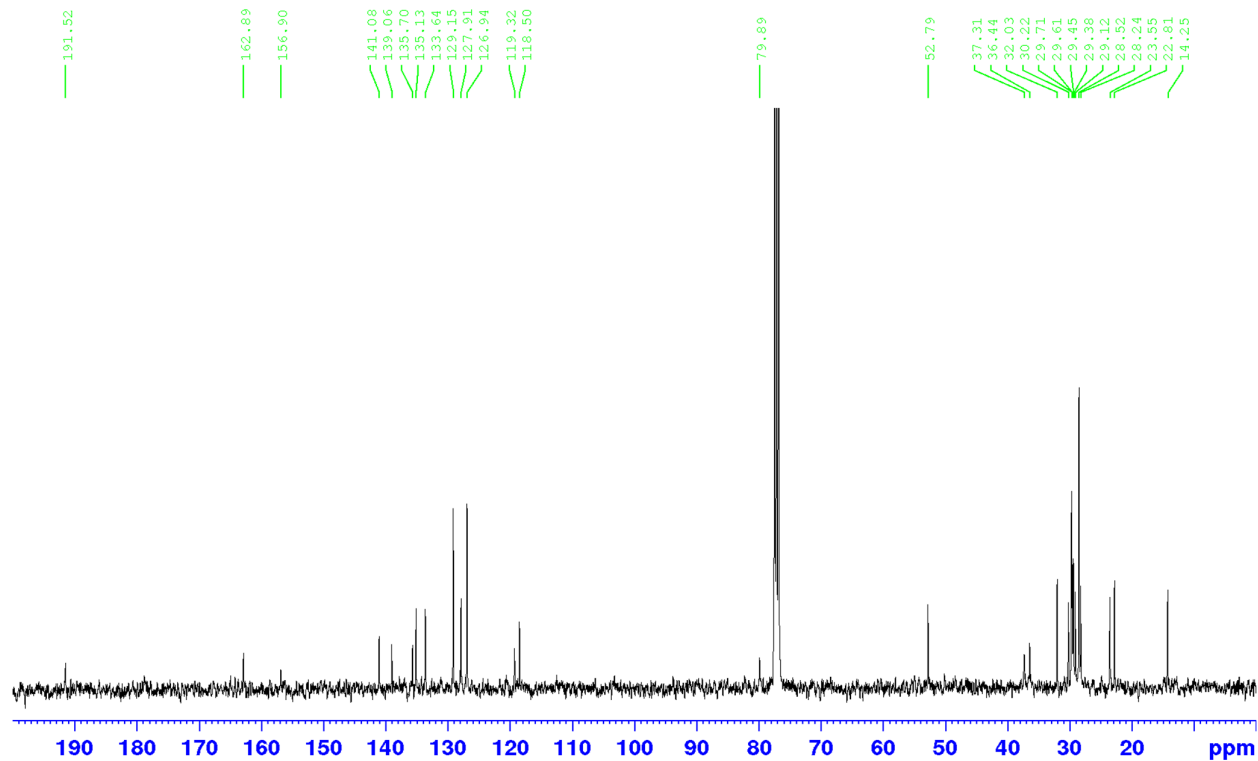



*tert*-Butyl (3-(2-(5-bromo-2-(hexadecylsulfonamido)phenyl)-2-oxoacetamido)propyl)carbamate (**26b**)

$^1\text{H}$  NMR (400 MHz,  $\text{CDCl}_3$ ):

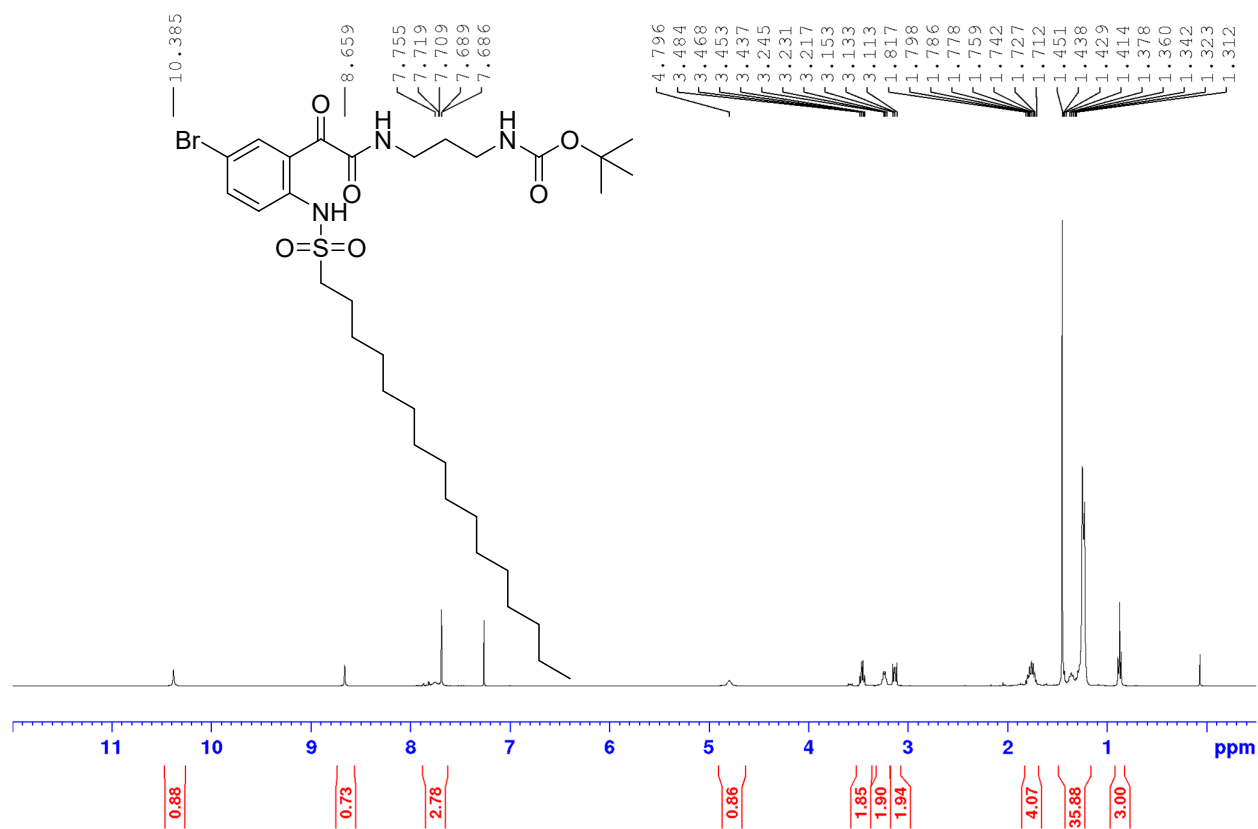

$^{13}\text{C}$  NMR (100 MHz,  $\text{CDCl}_3$ ):

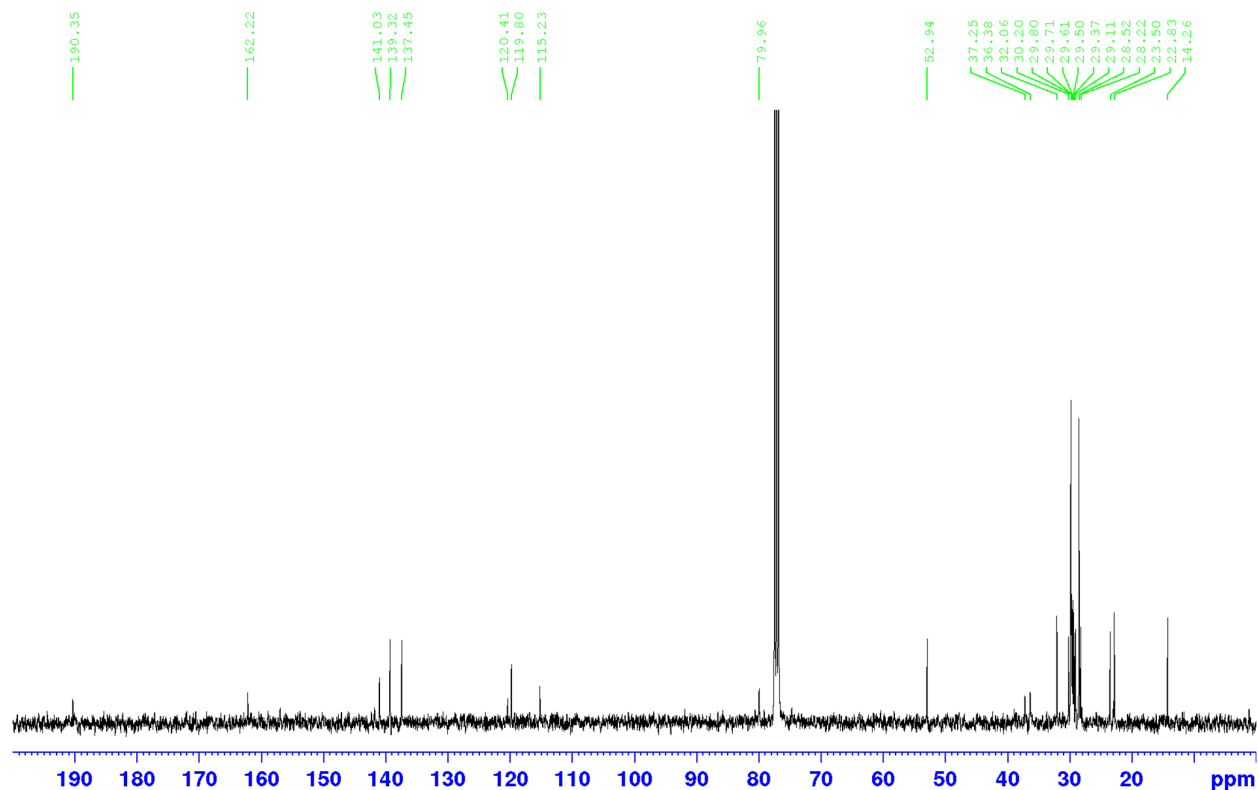

*tert*-Butyl (3-(2-(4-(hexadecylsulfonamido)-[1,1'-biphenyl]-3-yl)-2-oxoacetamido)propyl)carbamate  
(26c)

$^1\text{H}$  NMR (400 MHz,  $\text{CDCl}_3$ ):

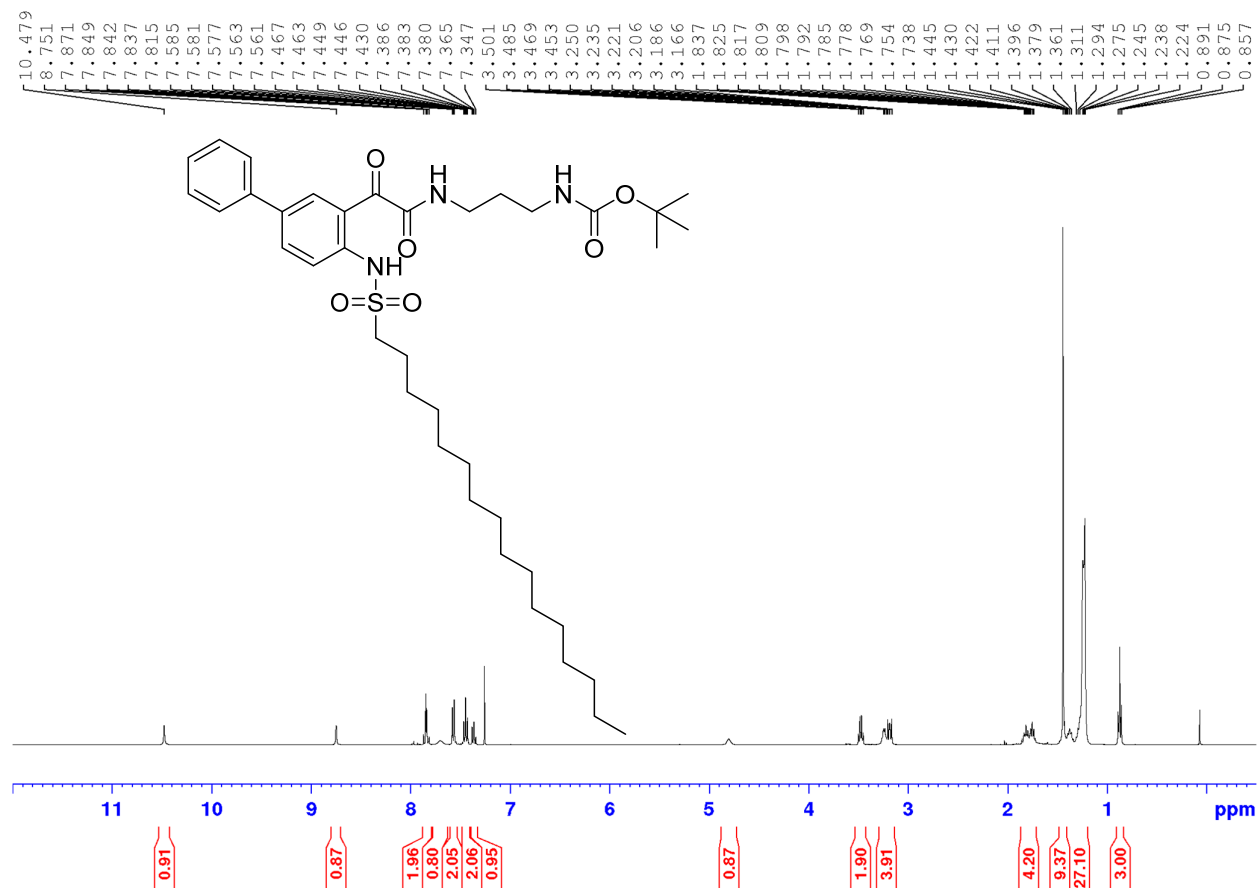

$^{13}\text{C}$  NMR (100 MHz,  $\text{CDCl}_3$ ):

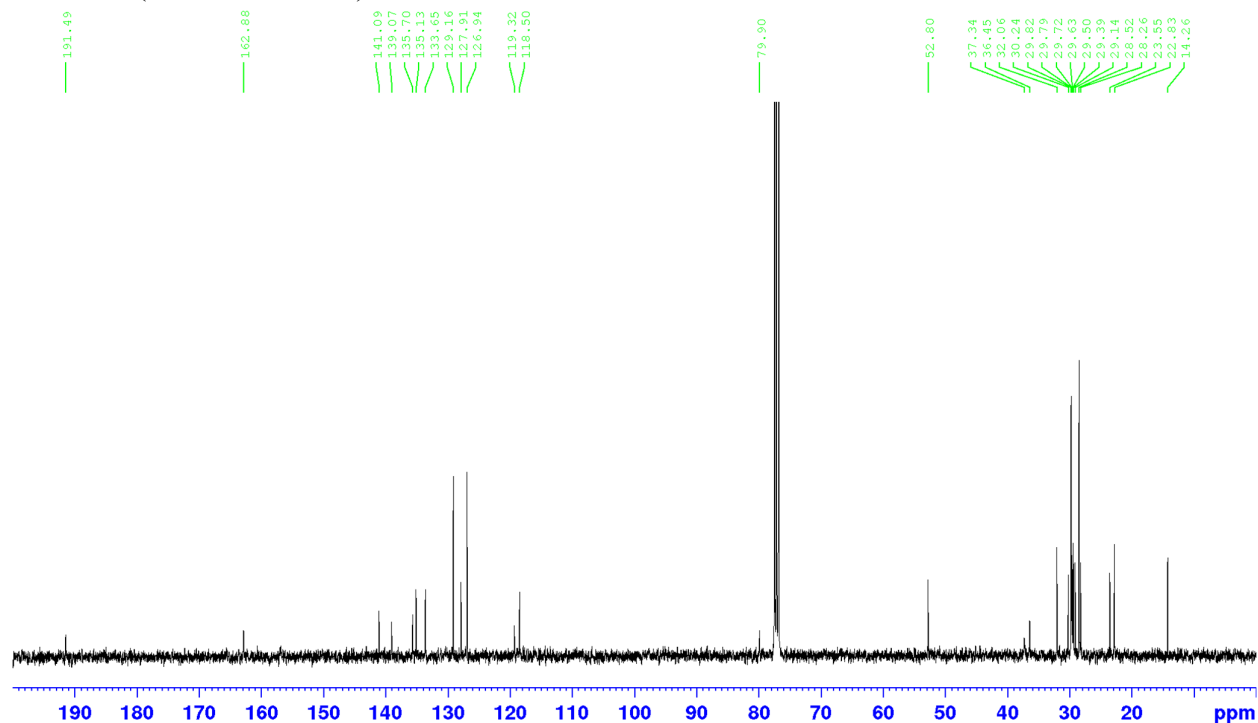

*N*-(3-aminopropyl)-2-(4-(octylsulfonamido)-[1,1':4',1''-terphenyl]-3-yl)-2-oxoacetamide hydrochloride  
(27d)

<sup>1</sup>H NMR (400 MHz, DMSO-*d*<sub>6</sub>):

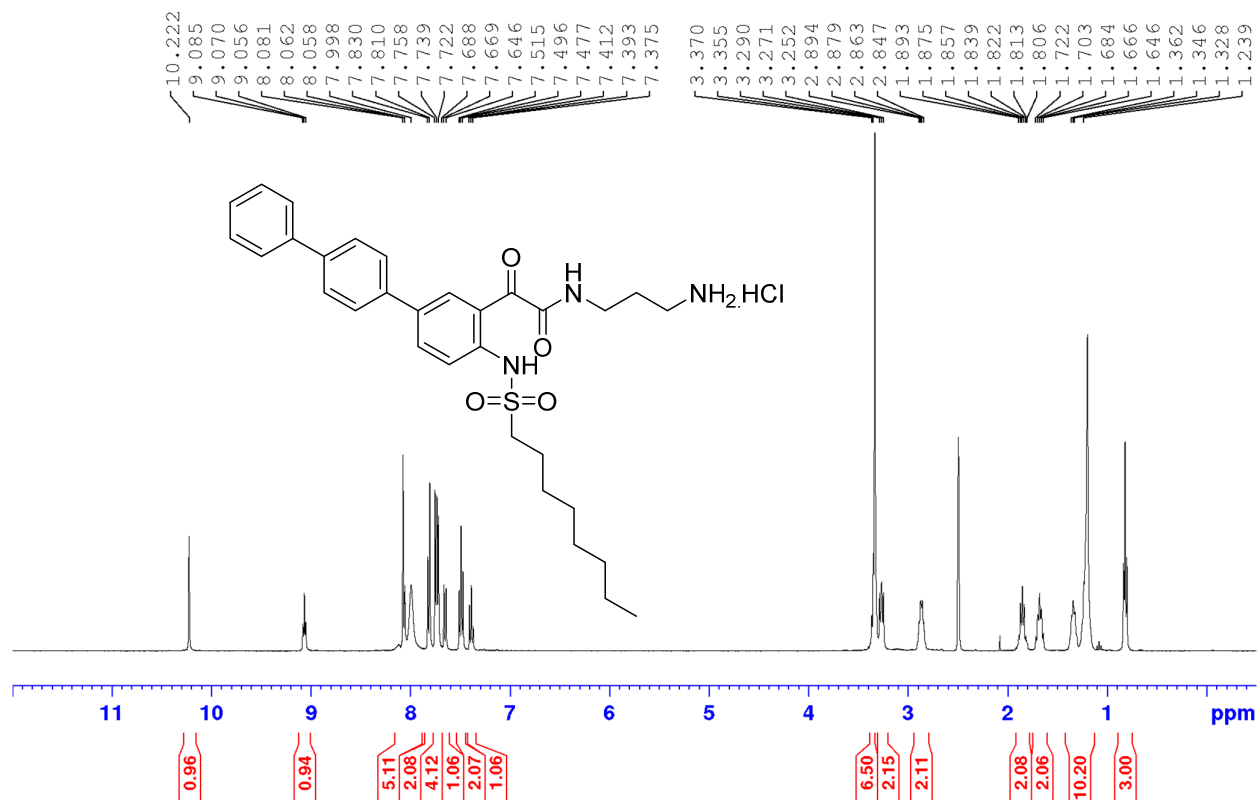

<sup>13</sup>C NMR (150 MHz, DMSO-*d*<sub>6</sub>):

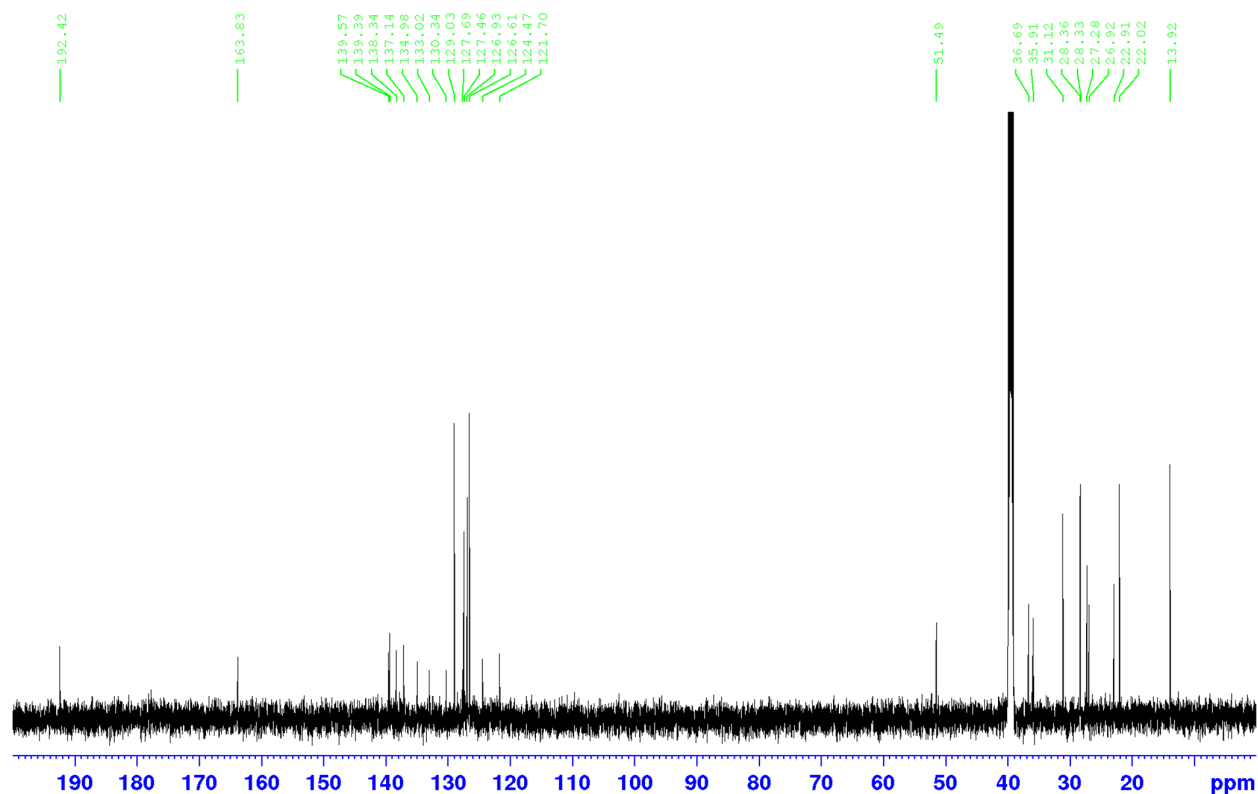

*N*-(3-Aminopropyl)-2-(2-(dodecylsulfonamido)phenyl)-2-oxoacetamide hydrochloride (**28a**)

$^1\text{H}$  NMR (400 MHz,  $\text{DMSO}-d_6$ ):

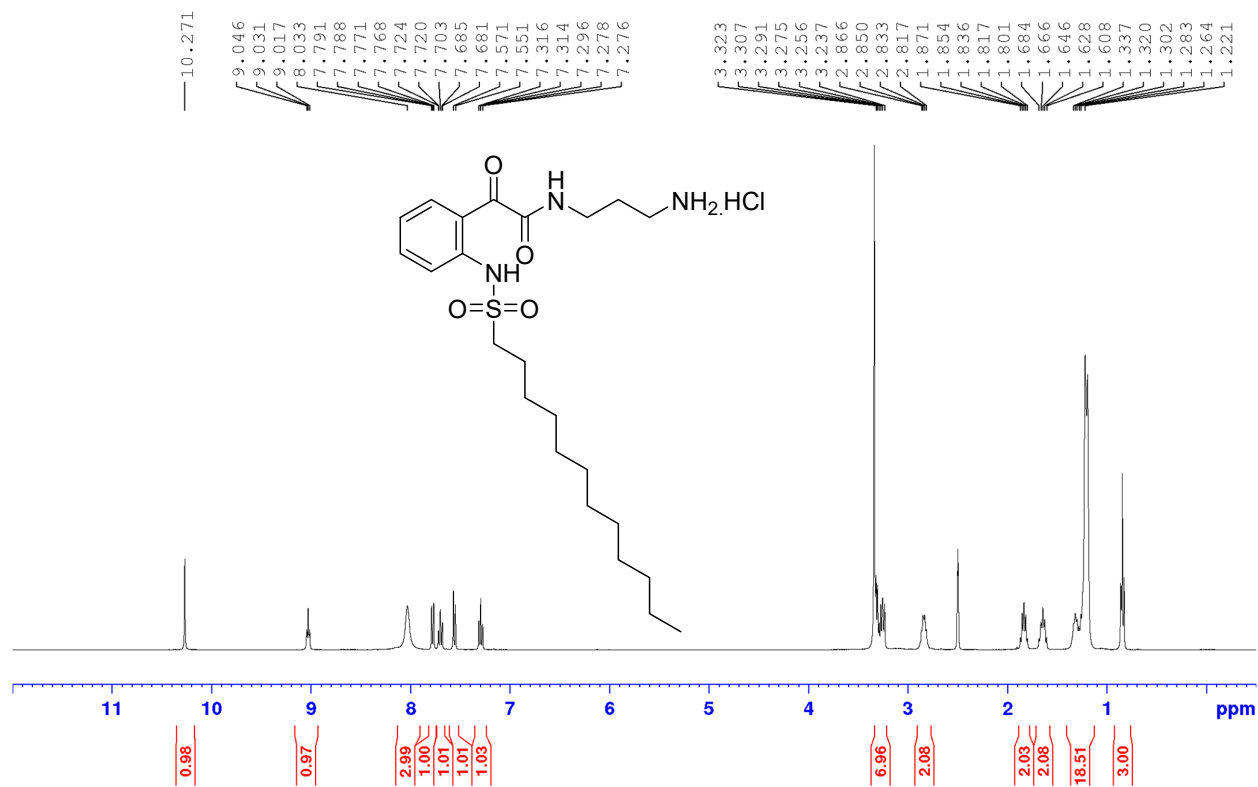

$^{13}\text{C}$  NMR (100 MHz,  $\text{DMSO}-d_6$ ):

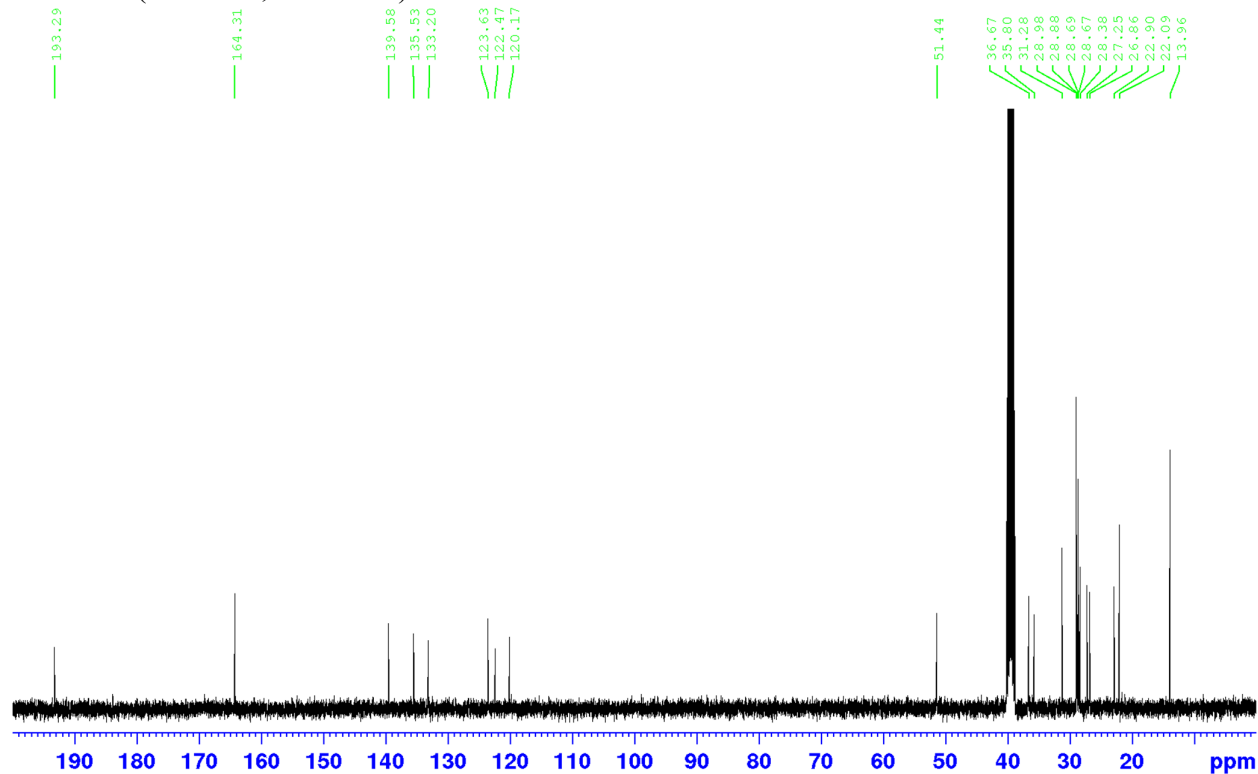

*N*-(3-Aminopropyl)-2-(5-bromo-2-(dodecylsulfonamido)phenyl)-2-oxoacetamide hydrochloride (**28b**)

$^1\text{H}$  NMR (400 MHz,  $\text{DMSO-}d_6$ ):

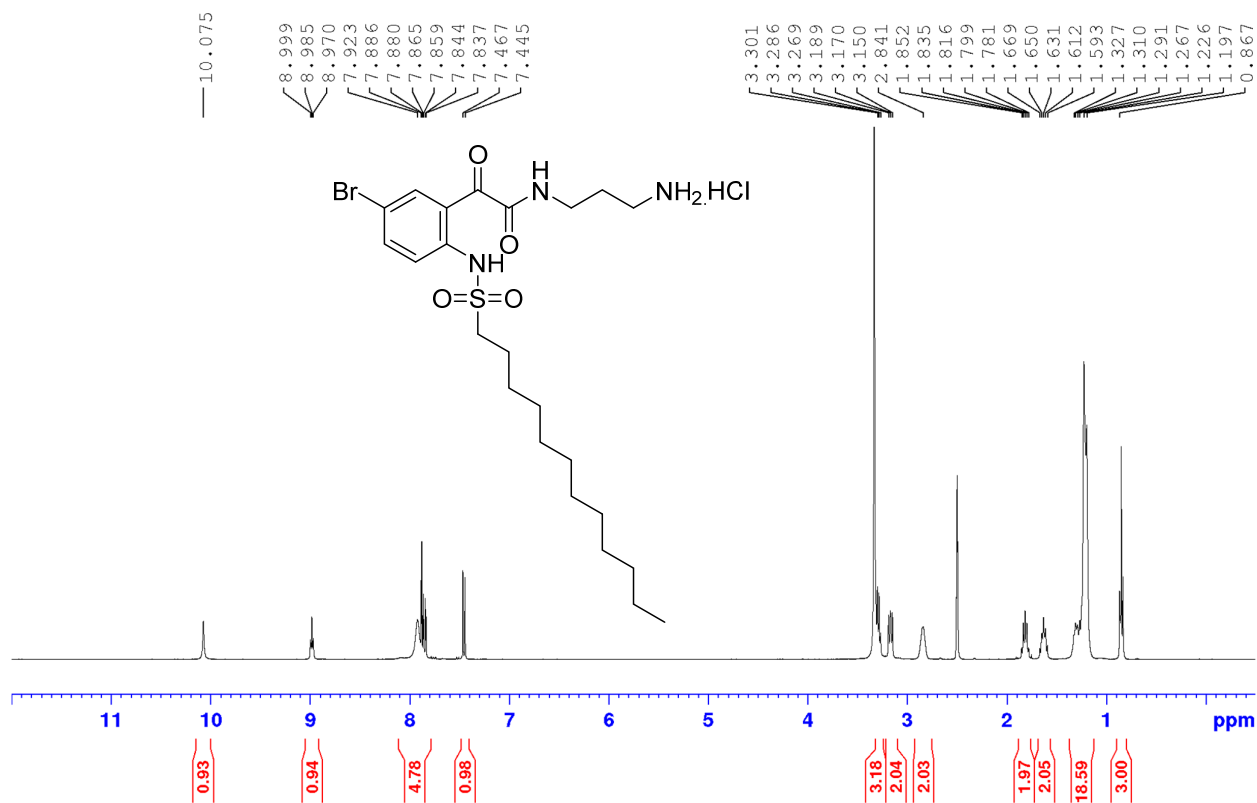

$^{13}\text{C}$  NMR (100 MHz,  $\text{DMSO-}d_6$ ):

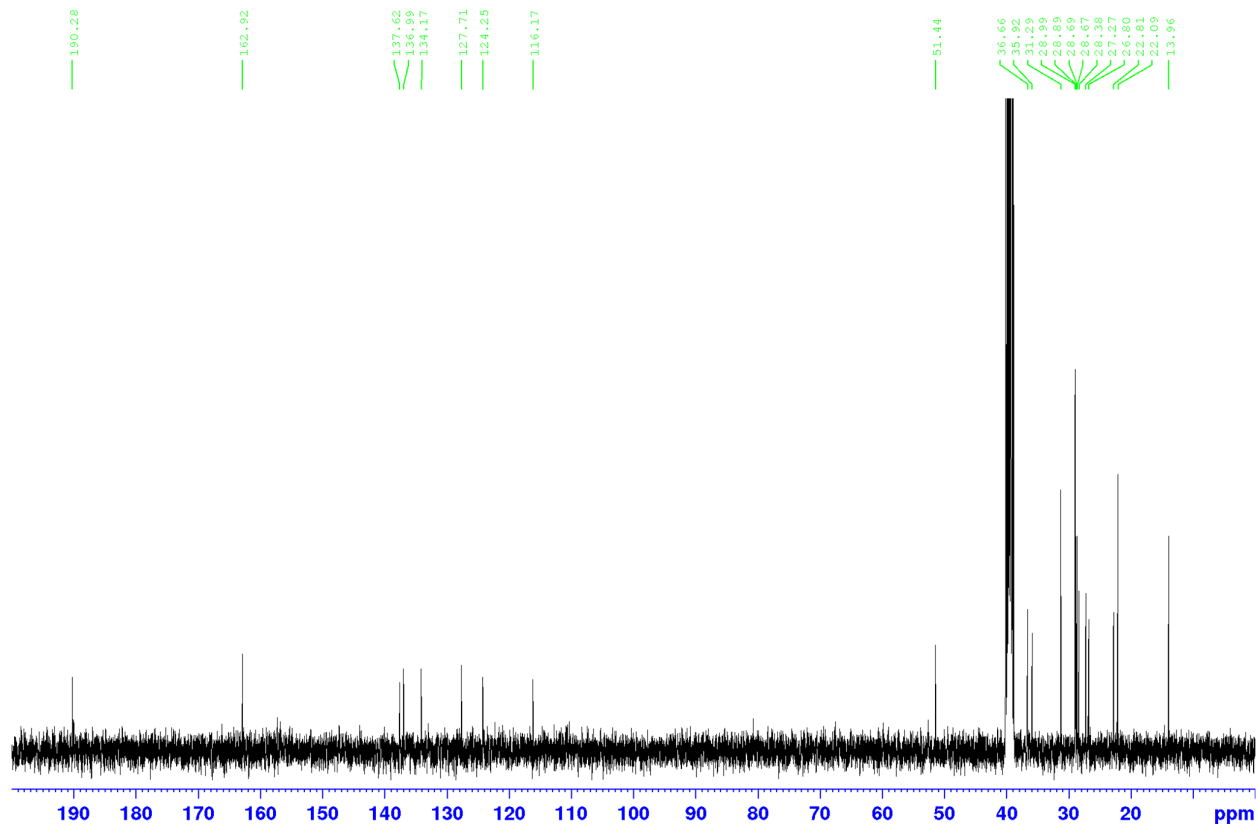



*N*-(3-aminopropyl)-2-(4-(dodecylsulfonamido)-[1,1'-biphenyl]-3-yl)-2-oxoacetamide hydrochloride  
(28c)

<sup>1</sup>H NMR (600 MHz, DMSO-*d*<sub>6</sub>):

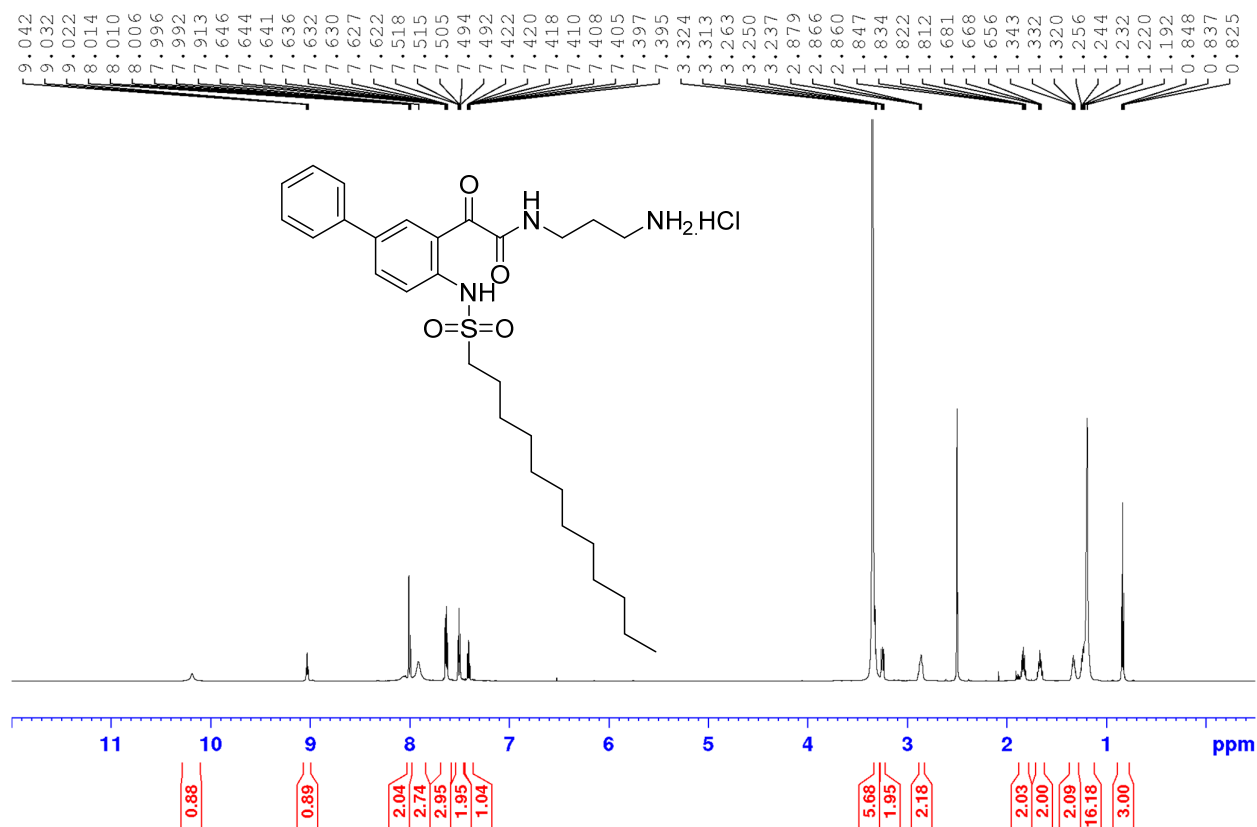

<sup>13</sup>C NMR (150 MHz, DMSO-*d*<sub>6</sub>):

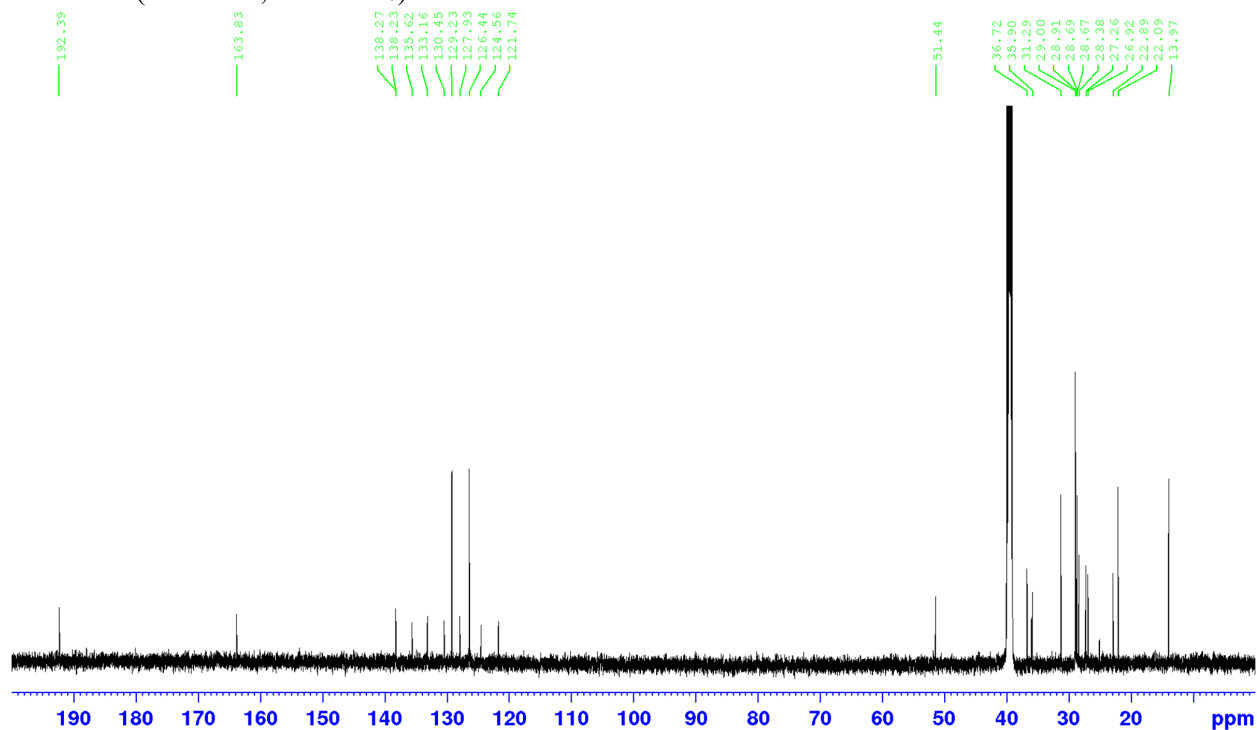

*N*-(3-Aminopropyl)-2-(2-(hexadecylsulfonamido)phenyl)-2-oxoacetamide hydrochloride (**29a**)

$^1\text{H}$  NMR (400 MHz,  $\text{DMSO-}d_6$ ):

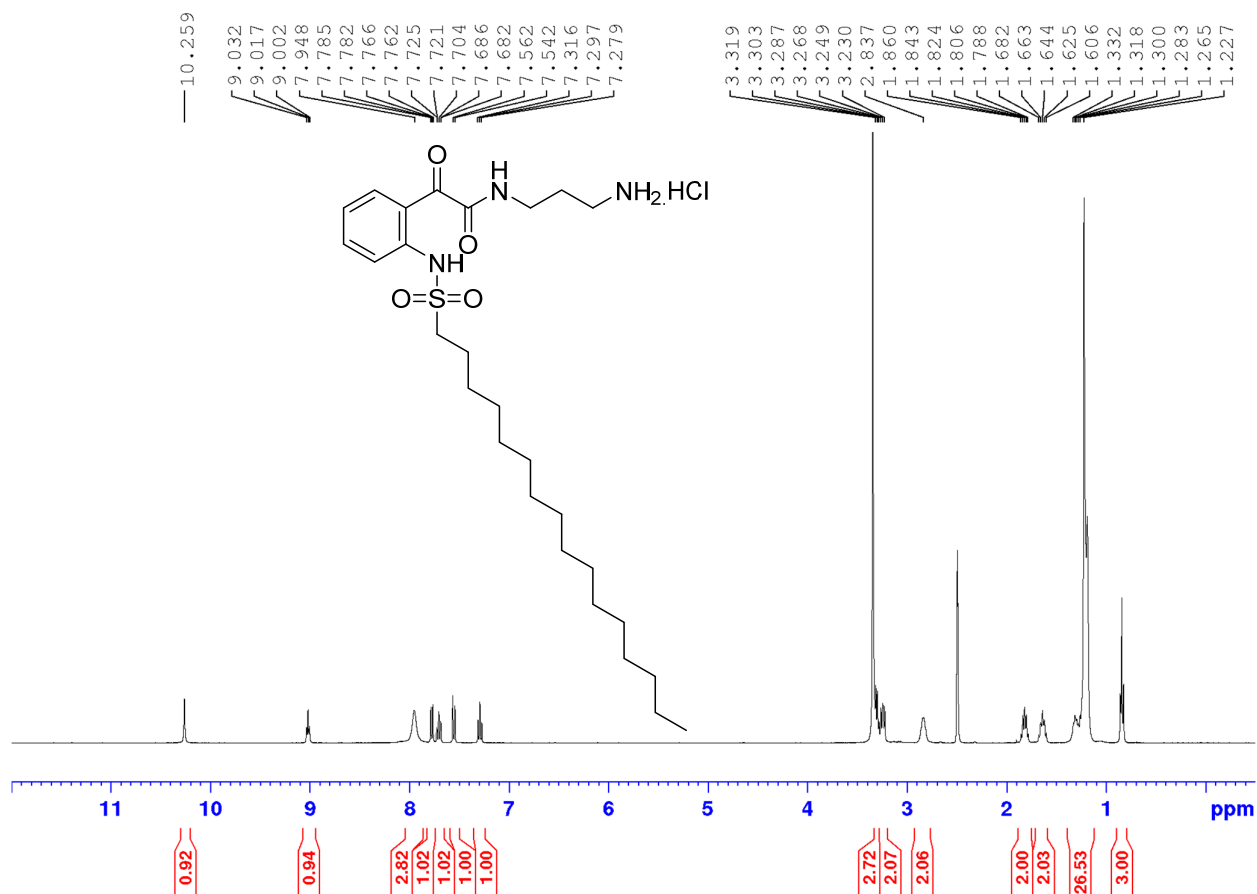

$^{13}\text{C}$  NMR (100 MHz,  $\text{DMSO-}d_6$ ):

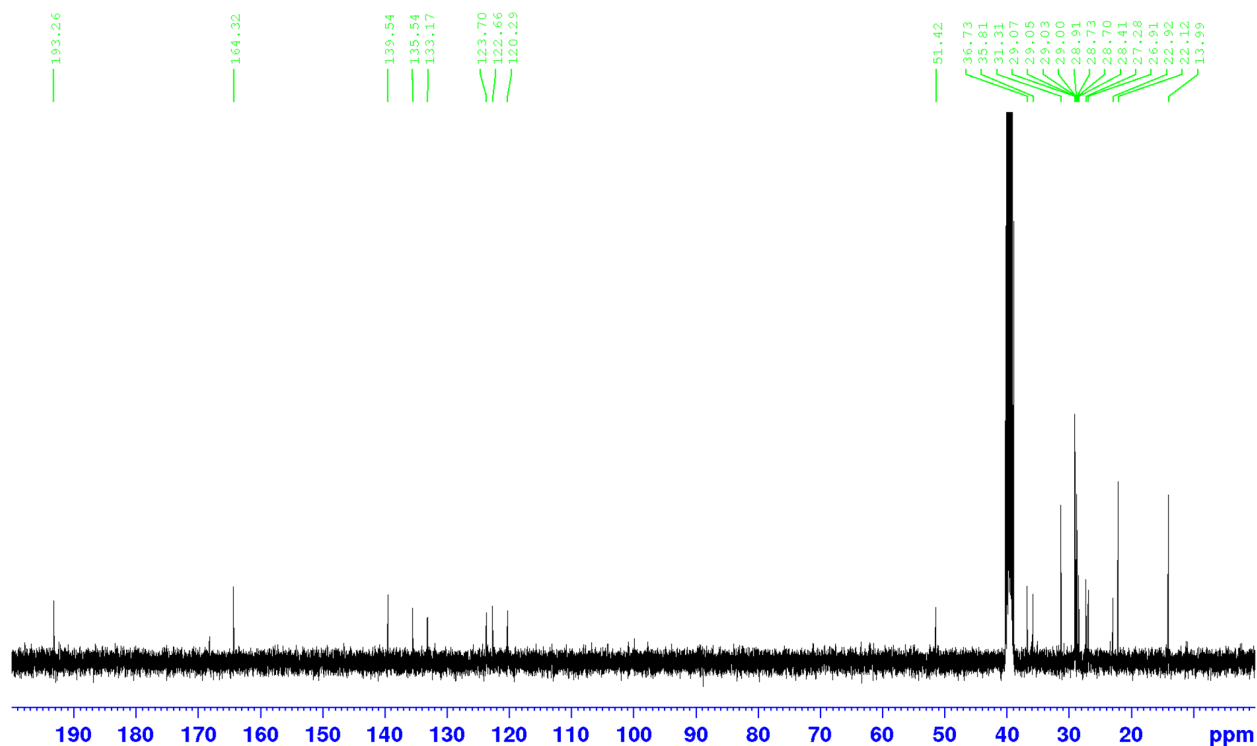

*N*-(3-Aminopropyl)-2-(5-bromo-2-(hexadecylsulfonamido)phenyl)-2-oxoacetamide hydrochloride  
(**29b**)

$^1\text{H}$  NMR (400 MHz,  $\text{DMSO}-d_6$ ):

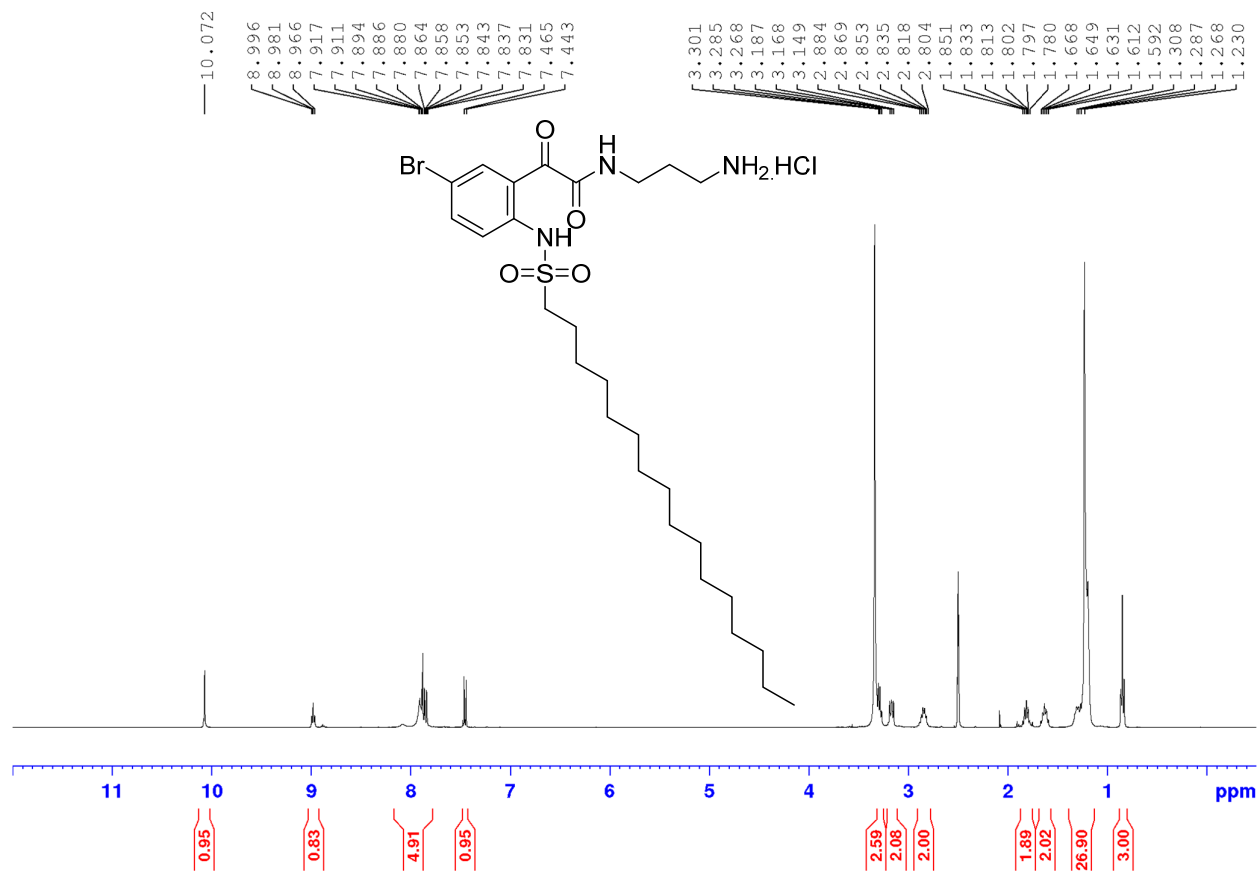

$^{13}\text{C}$  NMR (100 MHz,  $\text{DMSO}-d_6$ ):

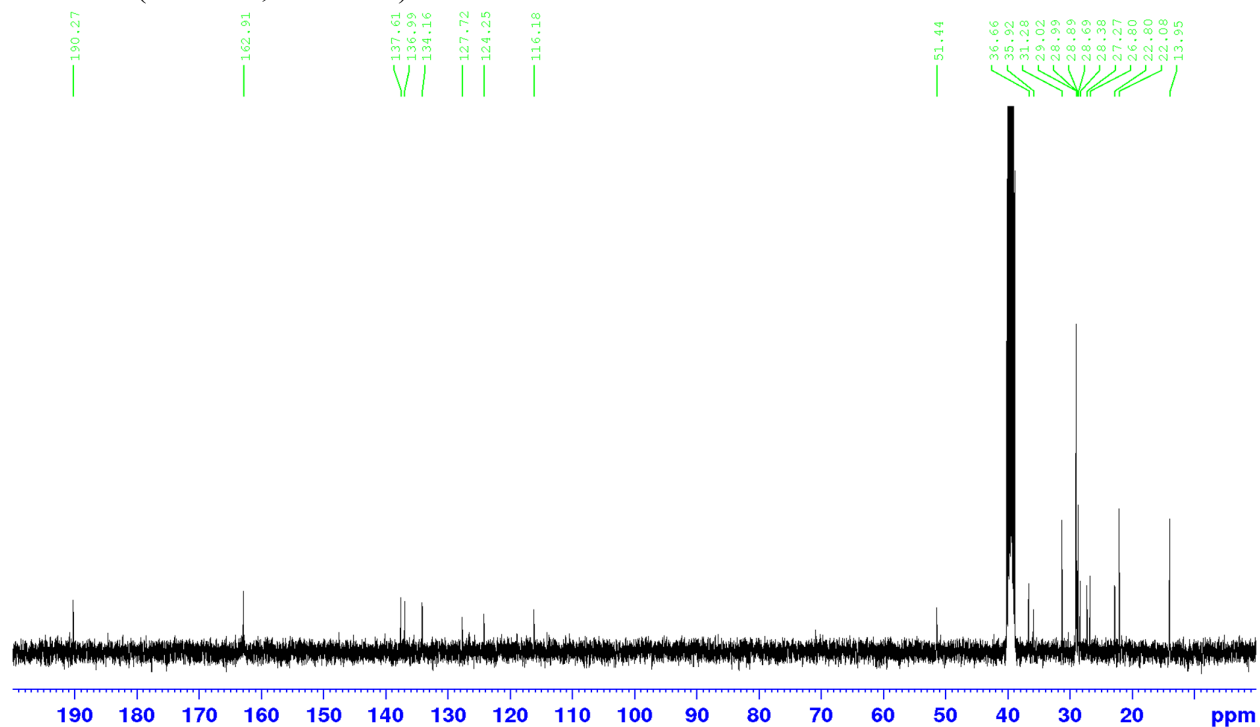

*N*-(3-Aminopropyl)-2-(4-(hexadecylsulfonamido)-[1,1'-biphenyl]-3-yl)-2-oxoacetamide hydrochloride (**29c**)

$^1\text{H}$  NMR (400 MHz,  $\text{DMSO}-d_6$ ):

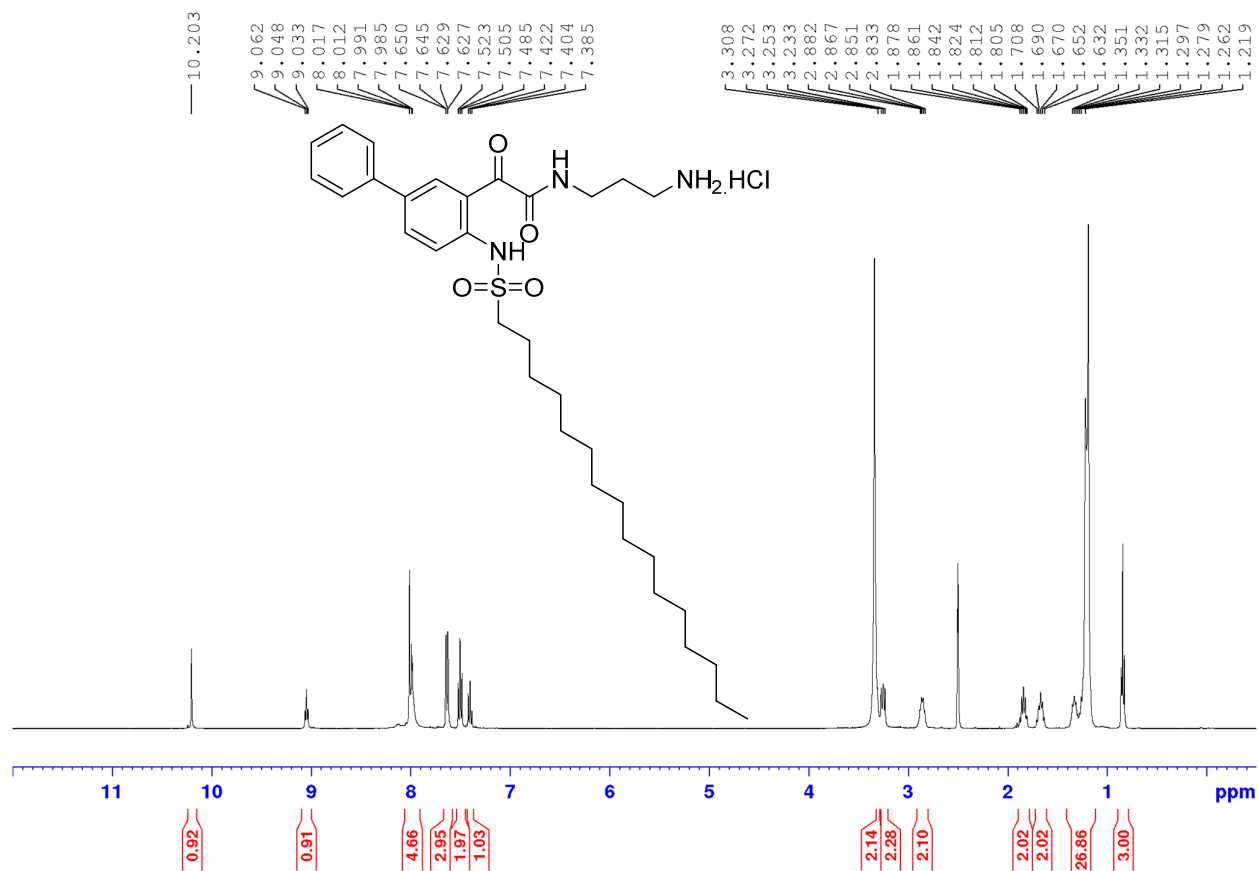

$^{13}\text{C}$  NMR (100 MHz,  $\text{DMSO}-d_6$ ):

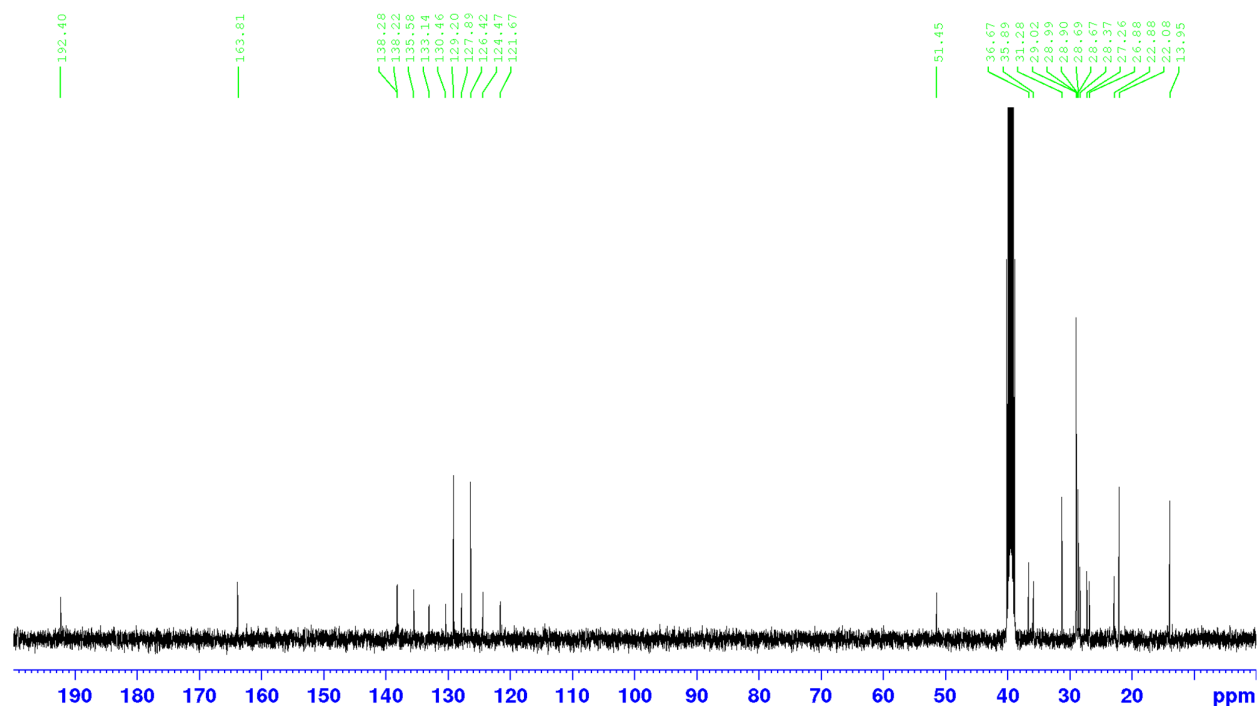

(*E*)-1-*tert*-Butyl-*N*-(*N'*-((*tert*-butyloxidanyl)carbonyl)-*N*-(3-(2-(4-(octylsulfonamido)-[1,1':4',1''-terphenyl]-3-yl)-2-oxoacetamido)propyl)carbamimidoyl)-1-oxidanecarboxamide (**30d**)

$^1\text{H}$  NMR (400 MHz,  $\text{CDCl}_3$ ):

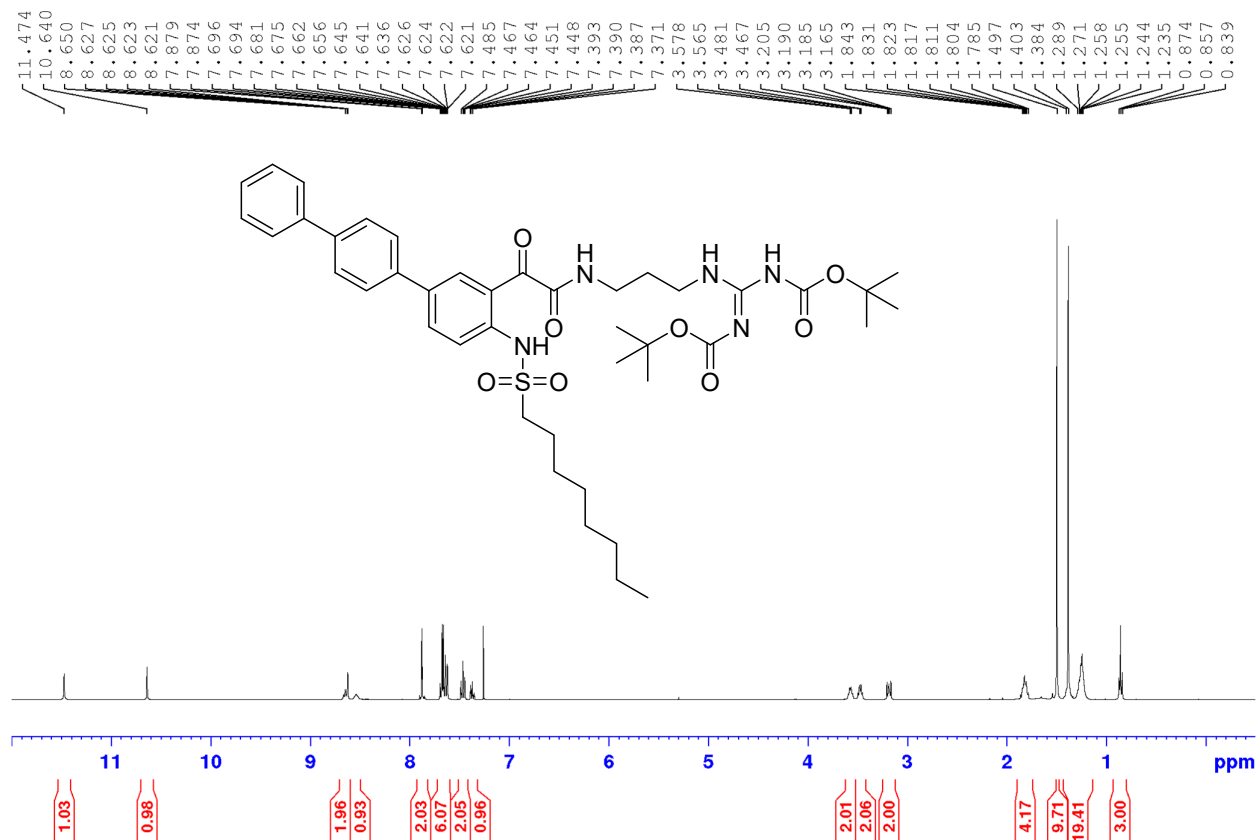

$^{13}\text{C}$  NMR (100 MHz,  $\text{CDCl}_3$ ):

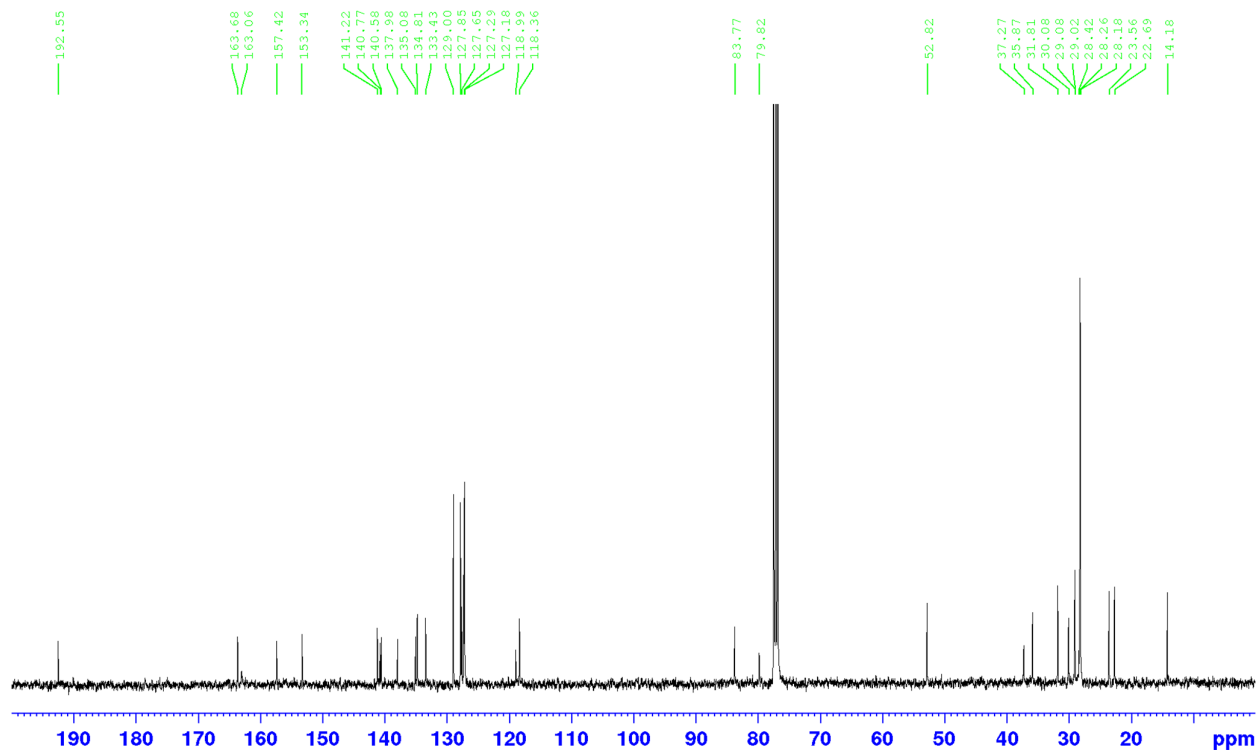

(*E*)-1-*tert*-Butyl-*N*-(*N'*-((*tert*-butyloxidanyl)carbonyl)-*N*-(3-(2-(2-(dodecylsulfonamido)phenyl)-2-oxoacetamido)propyl)carbamimidoyl)-1-oxidanecarboxamide (**31a**)

$^1\text{H}$  NMR (600 MHz,  $\text{CDCl}_3$ ):

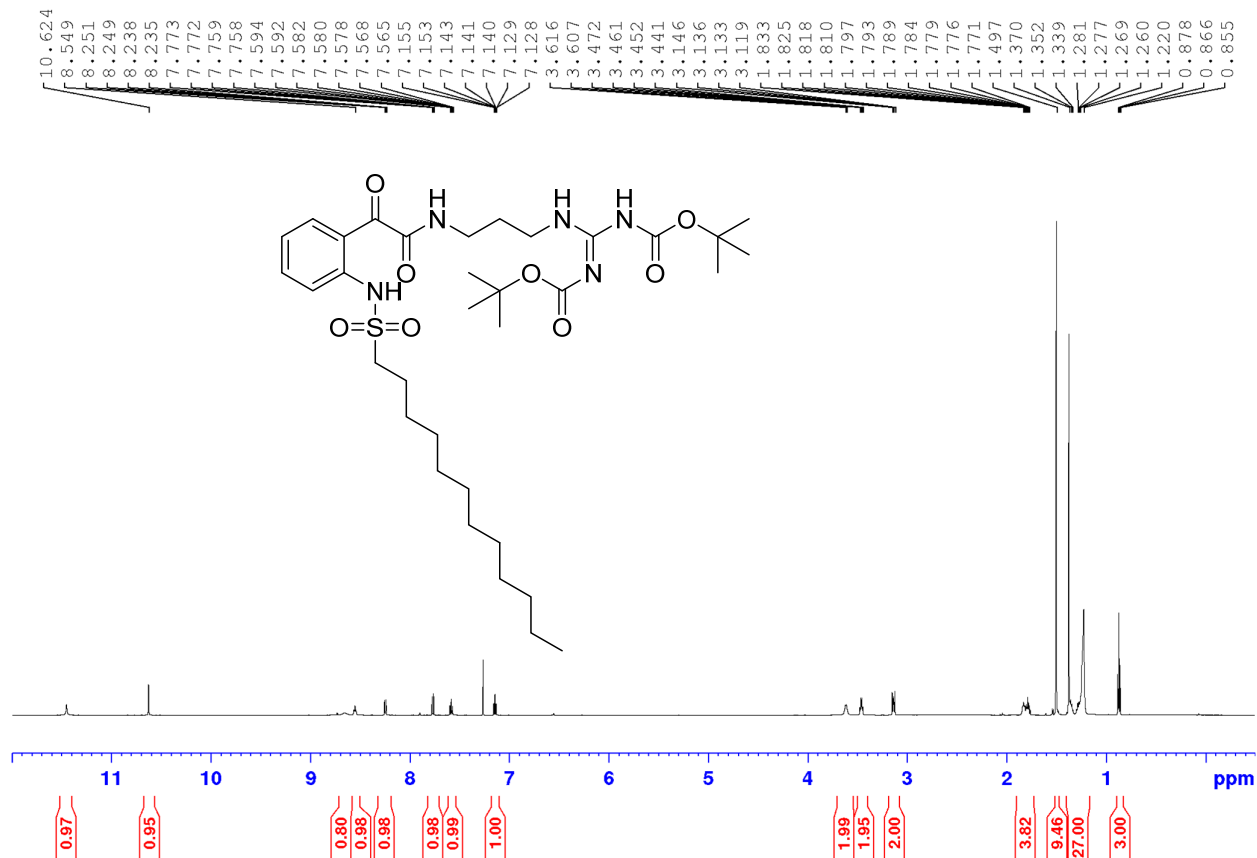

$^{13}\text{C}$  NMR (150 MHz,  $\text{CDCl}_3$ ):

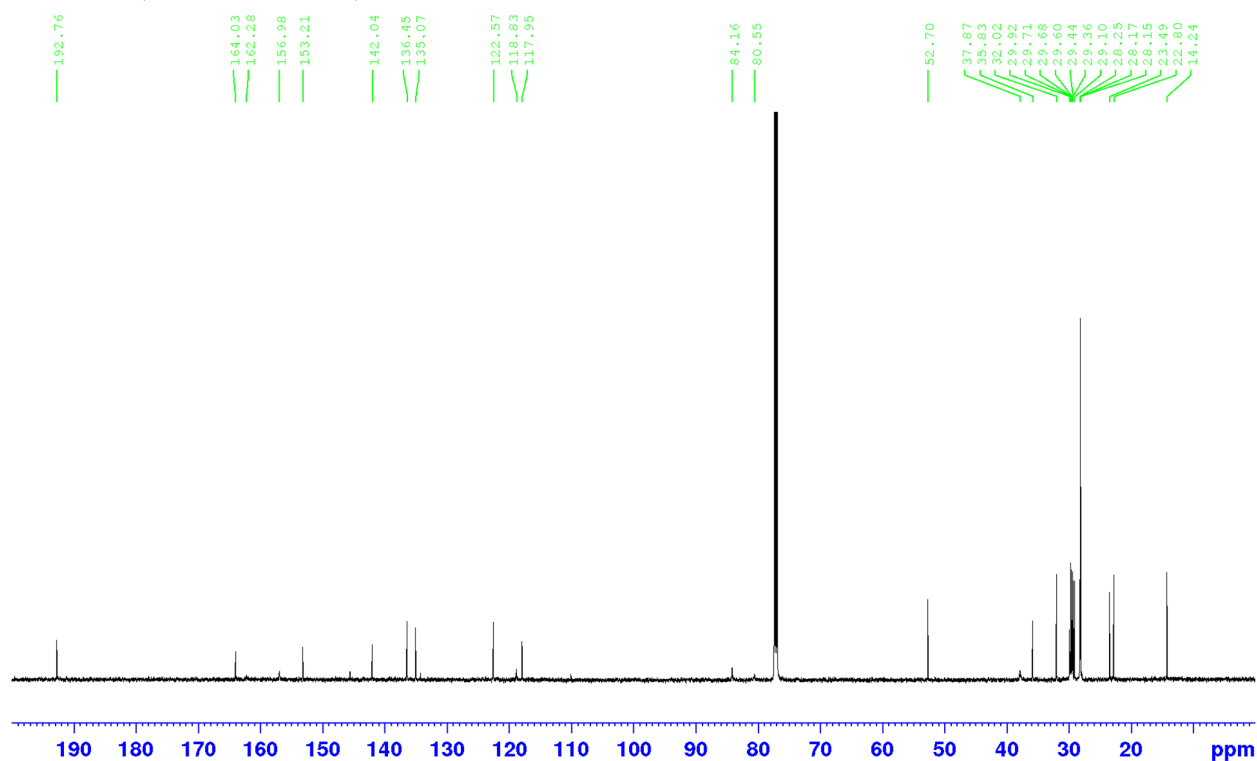

(*E*)-1-*tert*-Butyl-*N*-(*N'*-((*tert*-butyloxidanyl)carbonyl)-*N*-(3-(2-(5-bromo-2-(dodecylsulfonamido)phenyl)-2-oxoacetamido)propyl)carbamimidoyl)-1-oxidanecarboxamide (**31b**)

$^1\text{H}$  NMR (400 MHz,  $\text{CDCl}_3$ ):

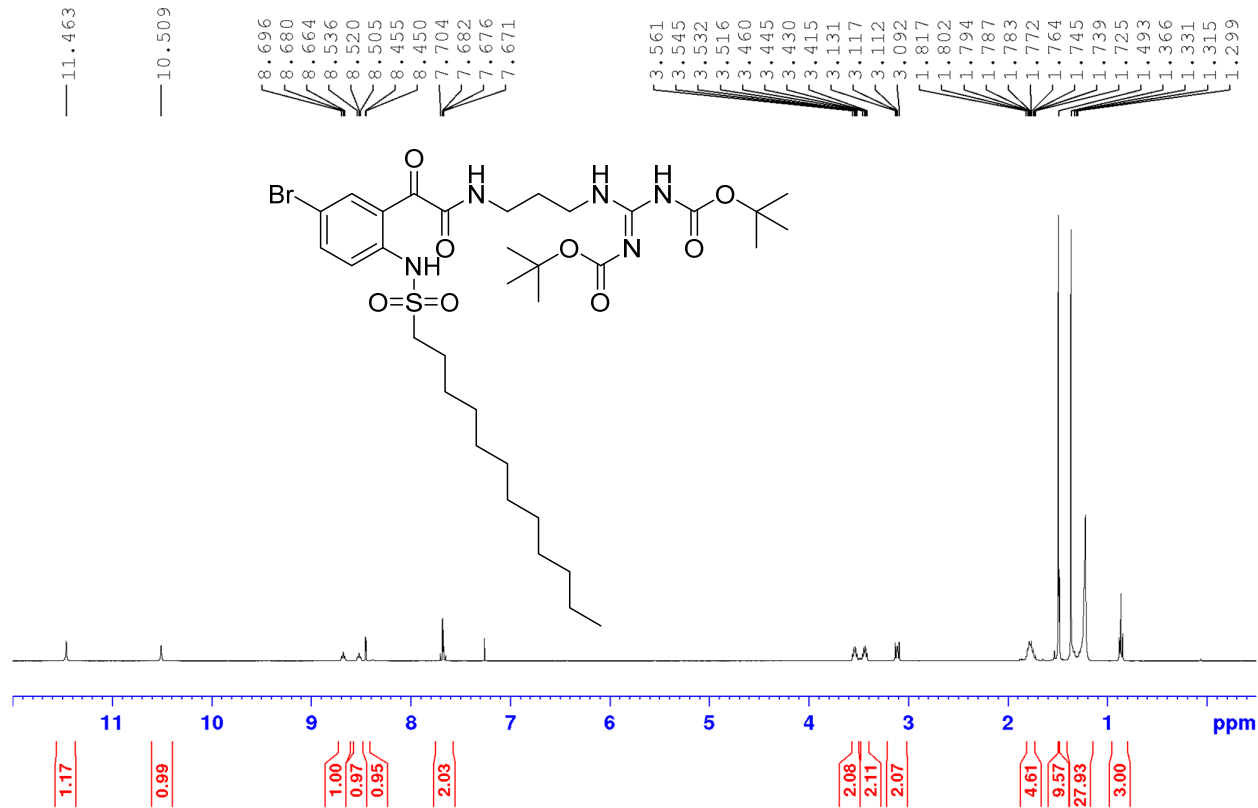

$^{13}\text{C}$  NMR (100 MHz,  $\text{CDCl}_3$ ):

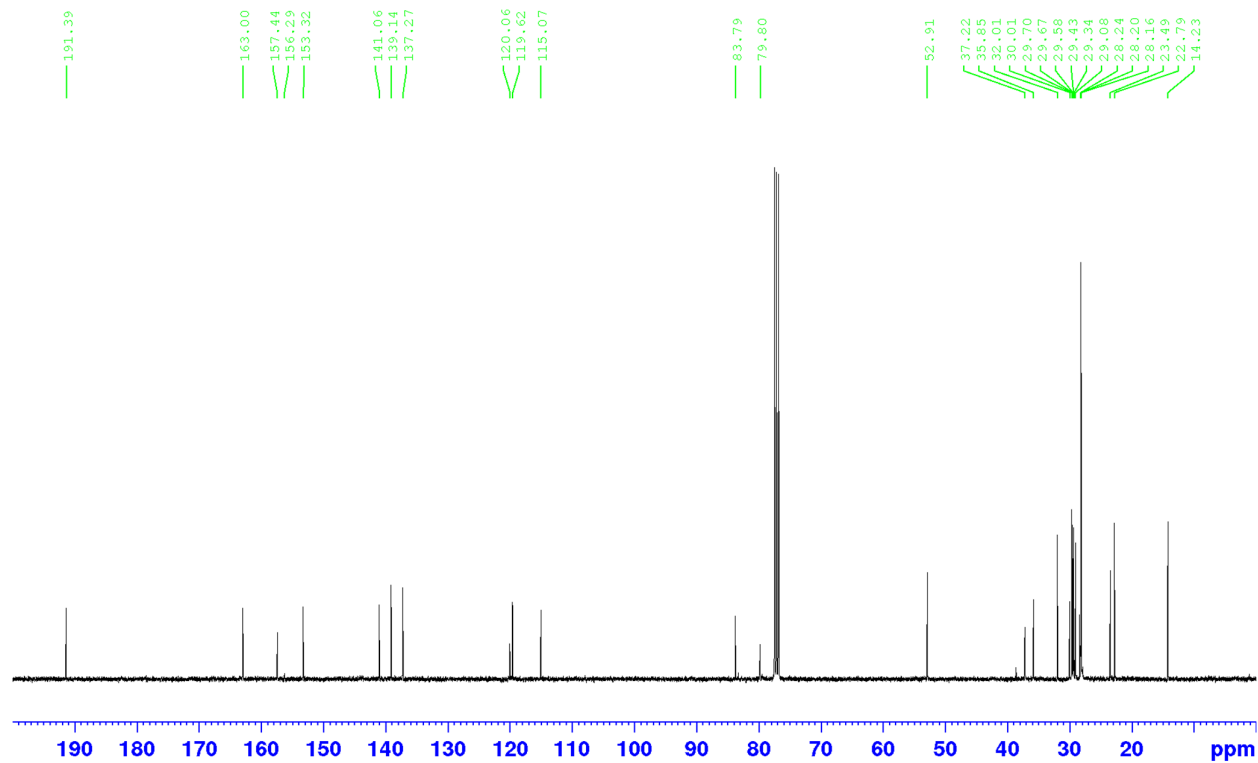

(*E*)-1-*tert*-Butyl-*N*-(*N'*-((*tert*-butyloxidanyl)carbonyl)-*N*-(3-(2-(4-(dodecylsulfonamido)-[1,1'-biphenyl]-3-yl)-2-oxoacetamido)propyl)carbamimidoyl)-1-oxidanecarboxamide (**31c**)

$^1\text{H}$  NMR (400 MHz,  $\text{CDCl}_3$ ):

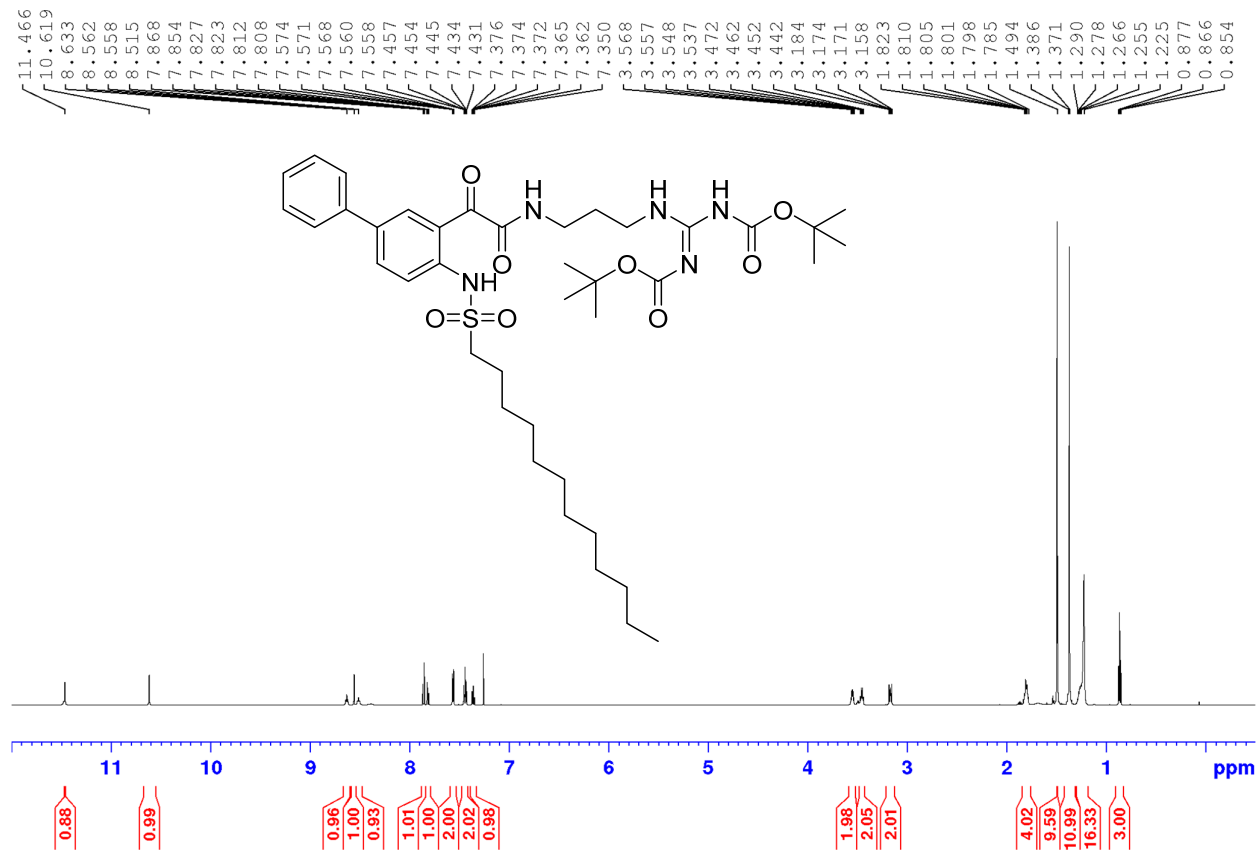

$^{13}\text{C}$  NMR (100 MHz,  $\text{CDCl}_3$ ):

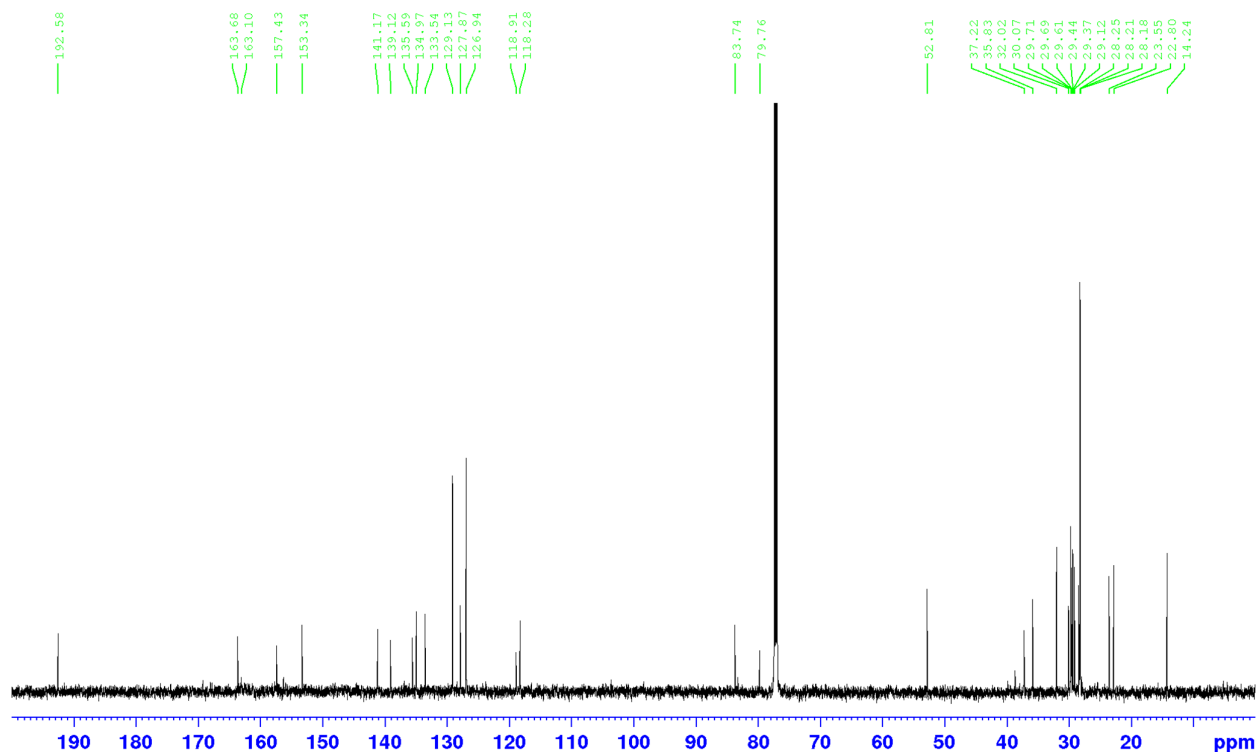



(*E*)-1-*tert*-Butyl-*N*-(*N'*-((*tert*-butyloxidanyl)carbonyl)-*N*-(3-(2-(2-(hexadecylsulfonamido)phenyl)-2-oxoacetamido)propyl)carbamimidoyl)-1-oxidanecarboxamide (**32a**)

$^1\text{H}$  NMR (400 MHz,  $\text{CDCl}_3$ ):

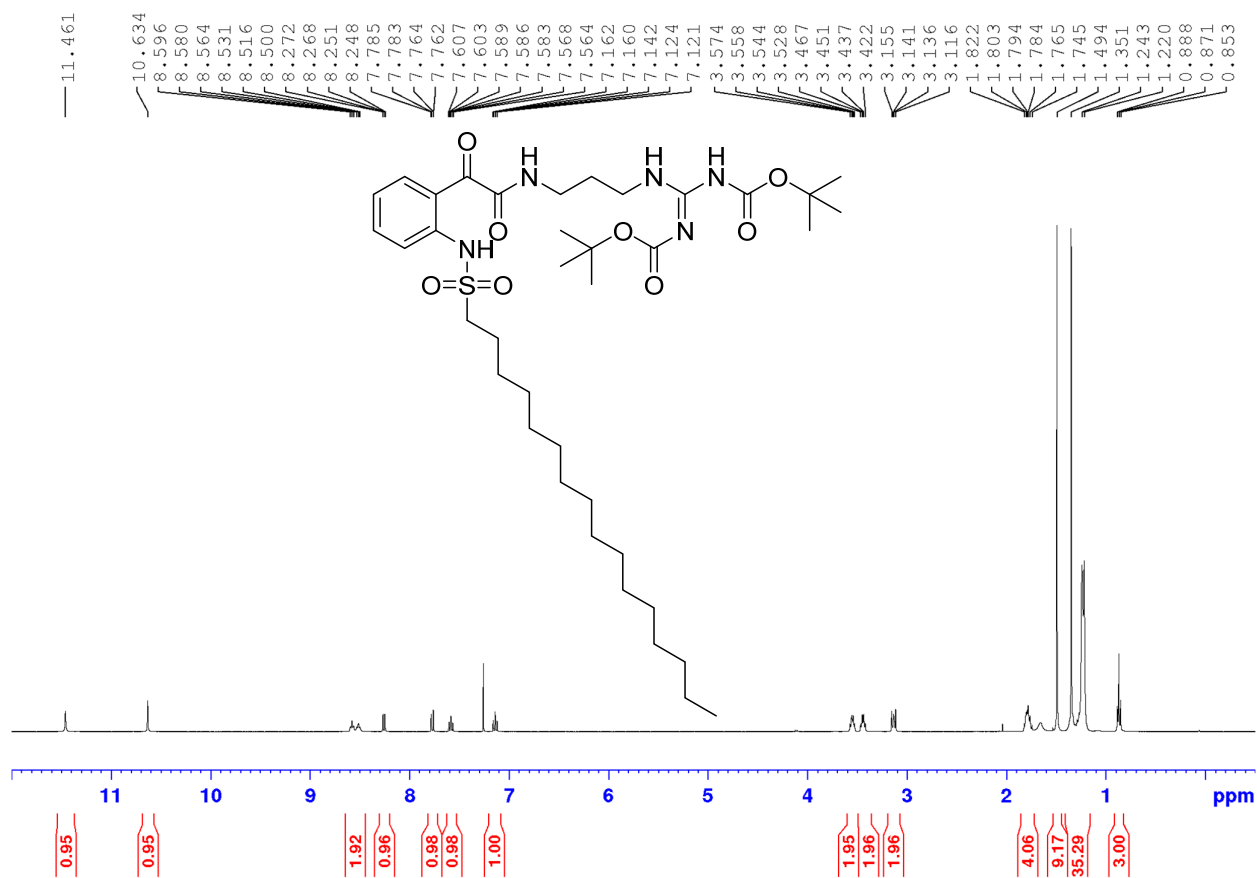

$^{13}\text{C}$  NMR (100 MHz,  $\text{CDCl}_3$ ):

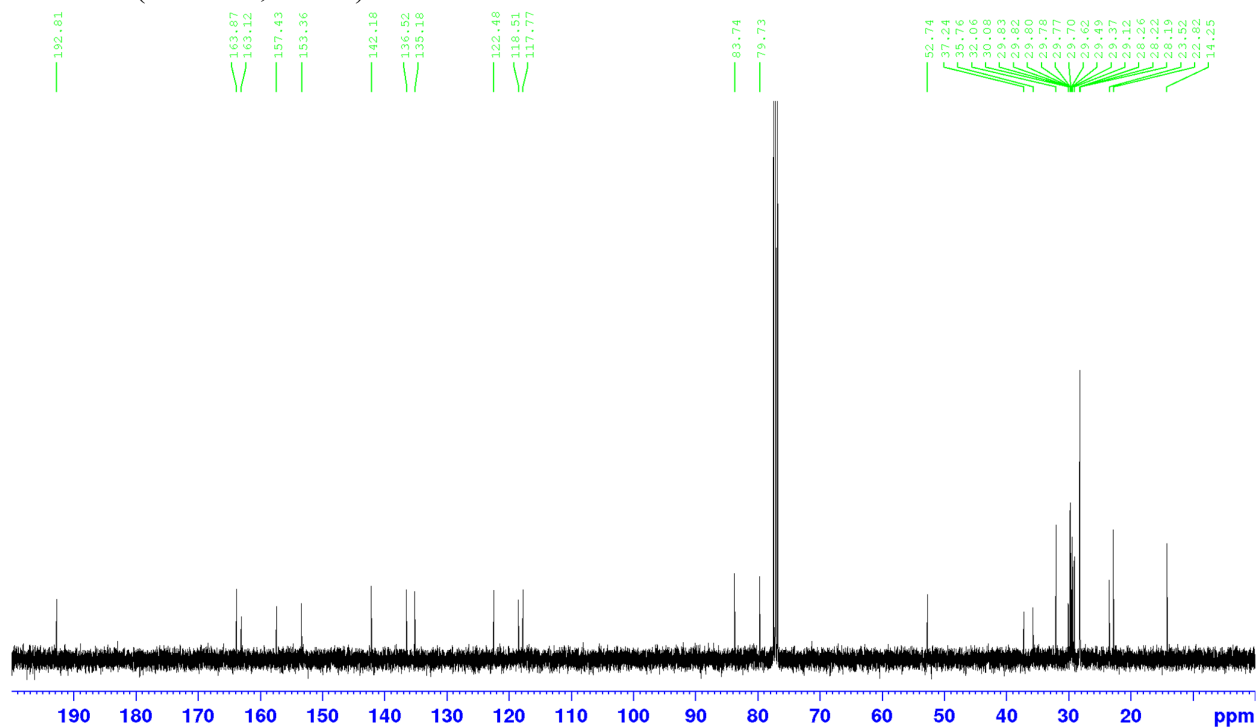

(*E*)-1-*tert*-Butyl-*N*-(*N'*-((*tert*-butyloxidanyl)carbonyl)-*N*-(3-(2-(5-bromo-2-(hexadecylsulfonamido)phenyl)-2-oxoacetamido)propyl)carbamimidoyl)-1-oxidanecarboxamide (**32b**)

$^1\text{H}$  NMR (600 MHz,  $\text{CDCl}_3$ ):

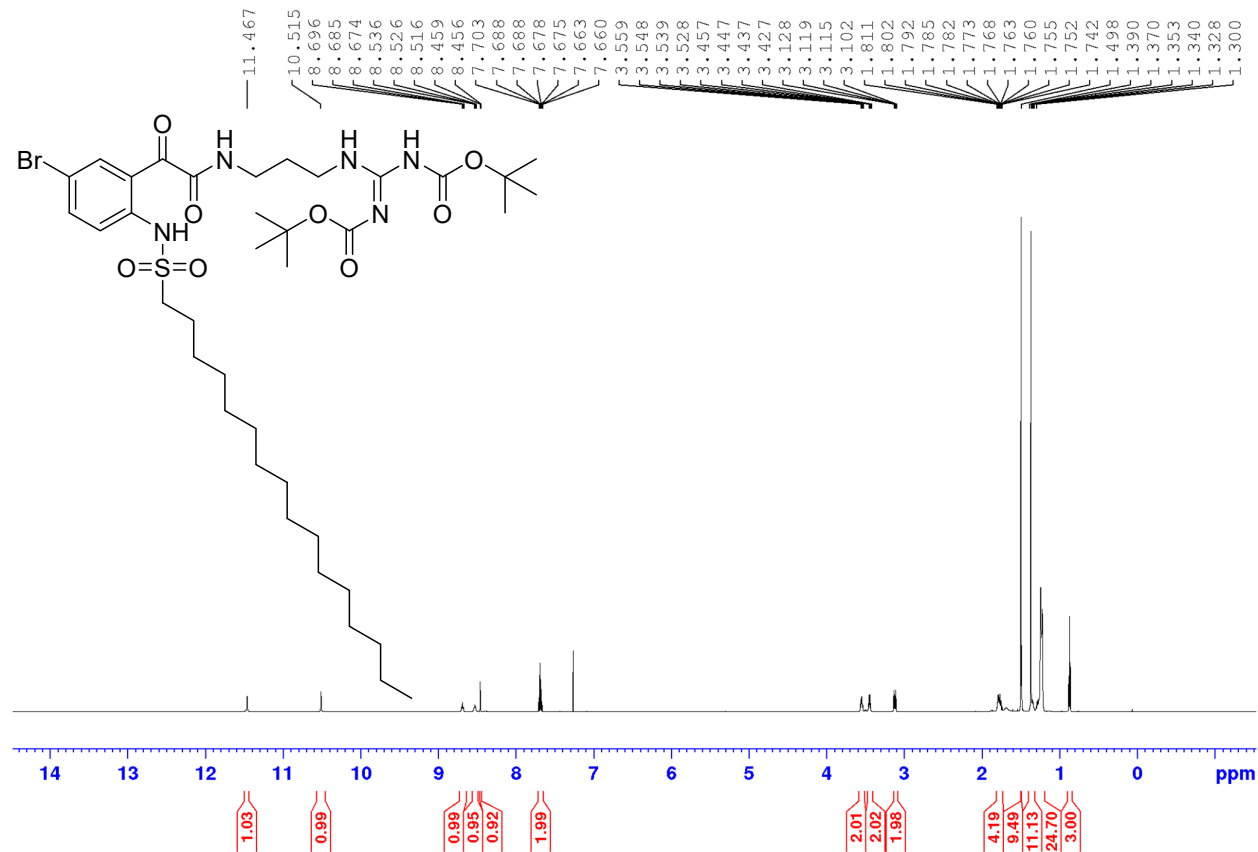

$^{13}\text{C}$  NMR (150 MHz,  $\text{CDCl}_3$ ):

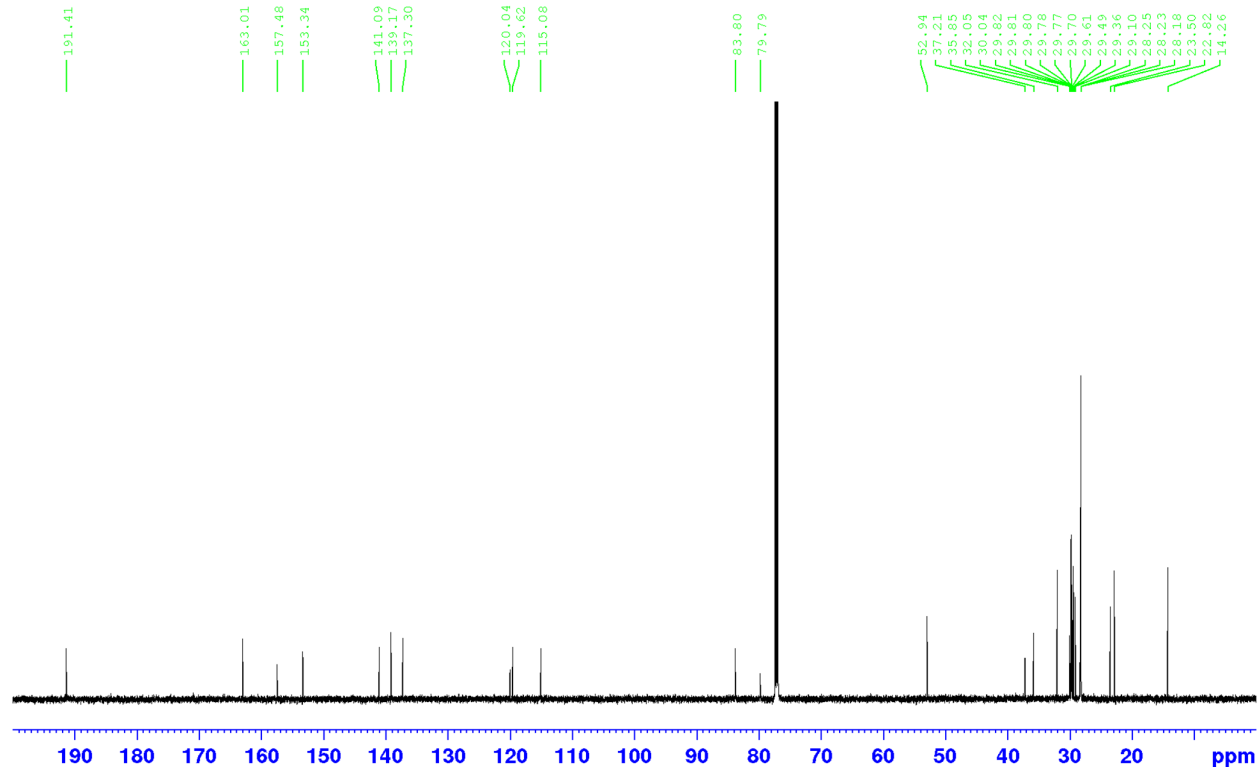

(*E*)-1-*tert*-Butyl-*N*-(*N'*-((*tert*-butyloxidanyl)carbonyl)-*N*-(3-(2-(4-(hexadecylsulfonamido)-[1,1'-biphenyl]-3-yl)-2-oxoacetamido)propyl)carbamimidoyl)-1-oxidanecarboxamide (**32c**)

$^1\text{H}$  NMR (600 MHz,  $\text{CDCl}_3$ ):

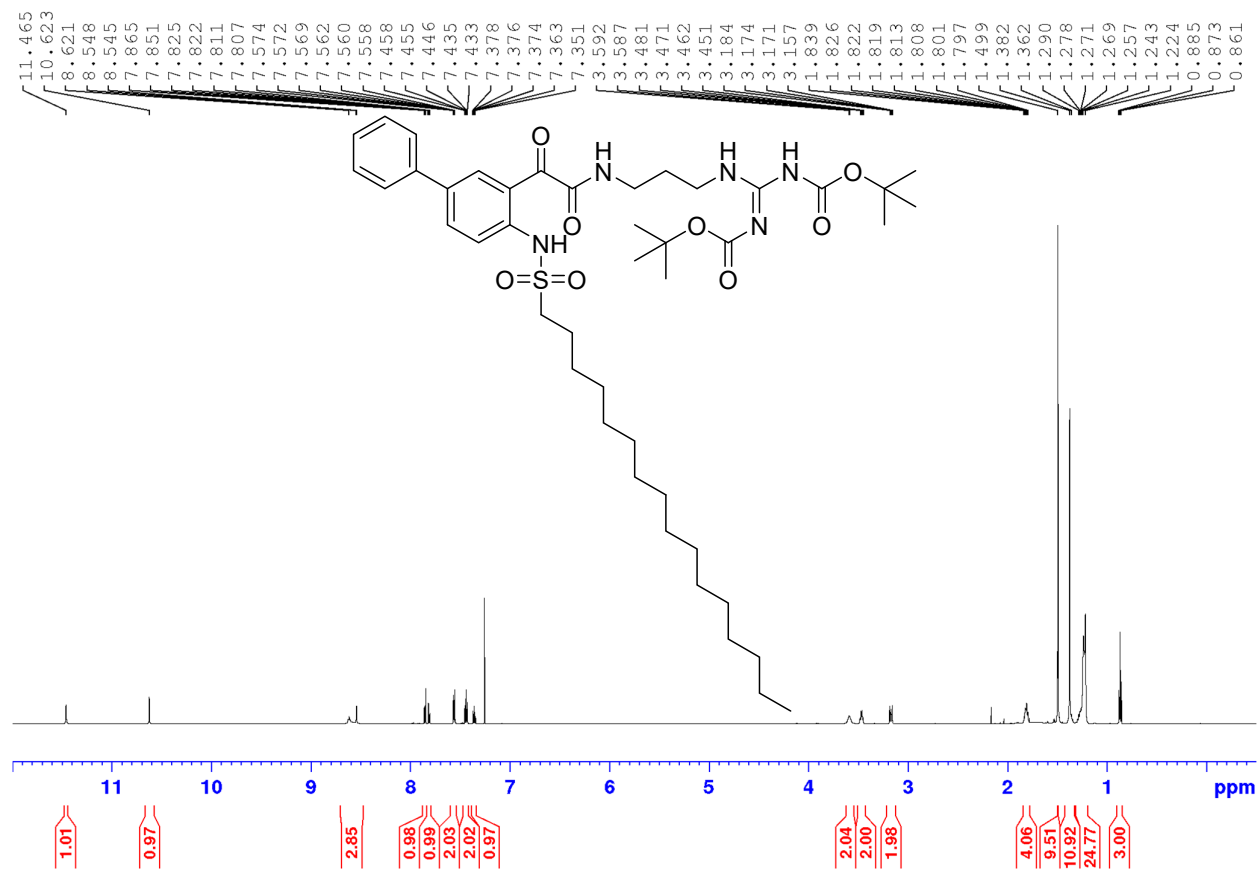

$^{13}\text{C}$  NMR (150 MHz,  $\text{CDCl}_3$ ):

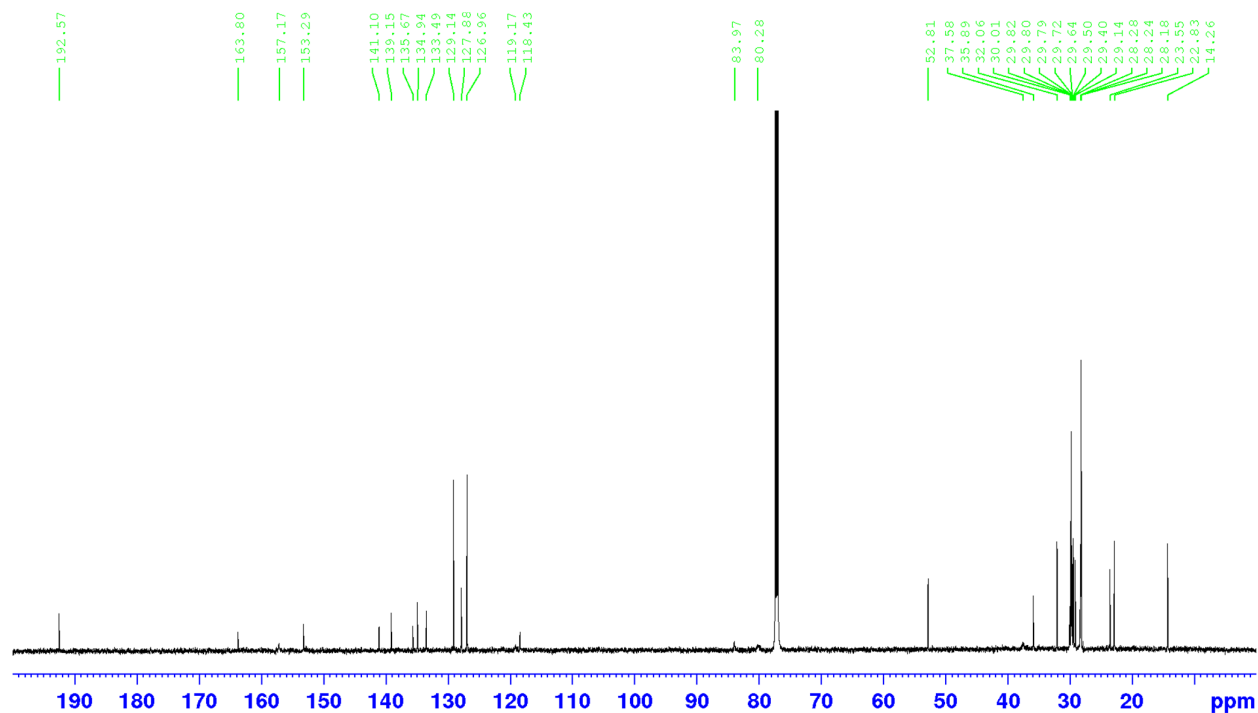

*N*-(3-Guanidinopropyl)-2-(4-(octylsulfonamido)-[1,1':4',1''-terphenyl]-3-yl)-2-oxoacetamide hydrochloride (**33d**)

$^1\text{H}$  NMR (600 MHz,  $\text{DMSO-}d_6$ ):

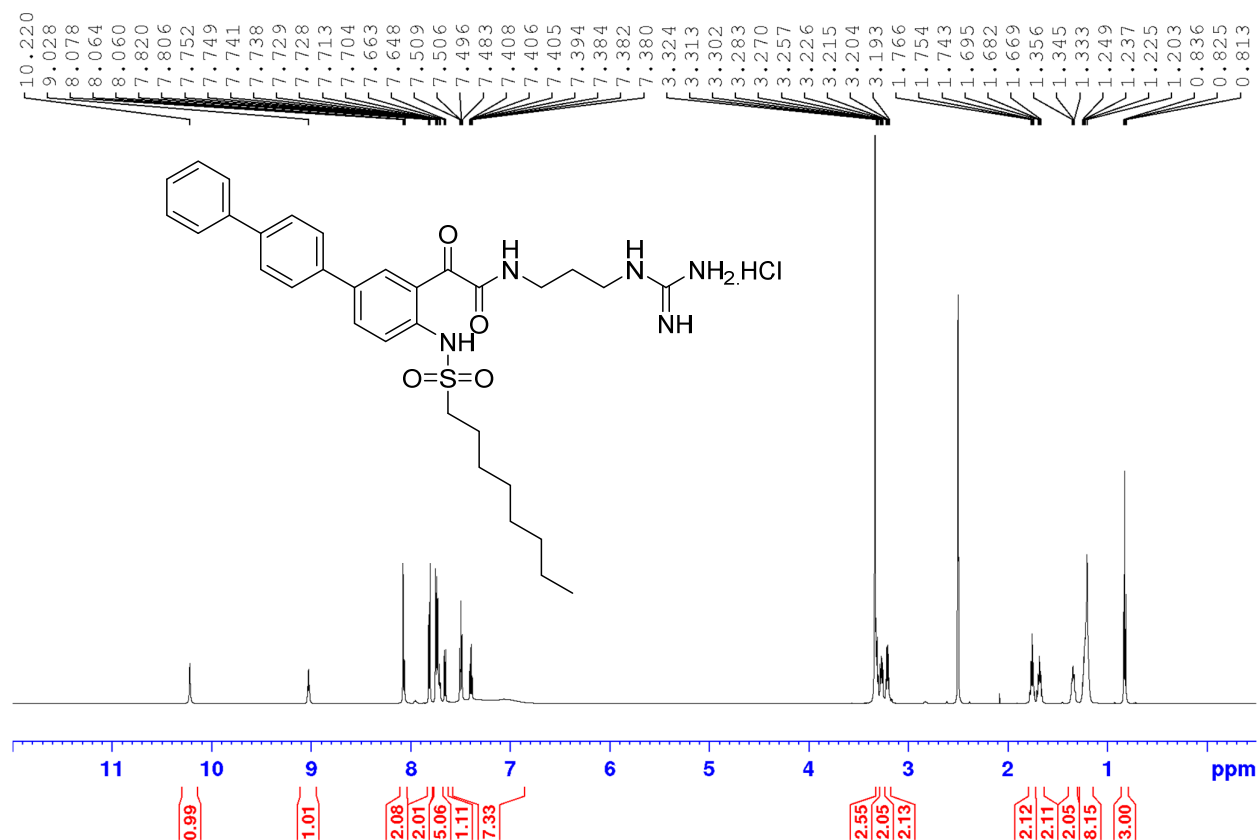

$^{13}\text{C}$  NMR (150 MHz,  $\text{DMSO-}d_6$ ):

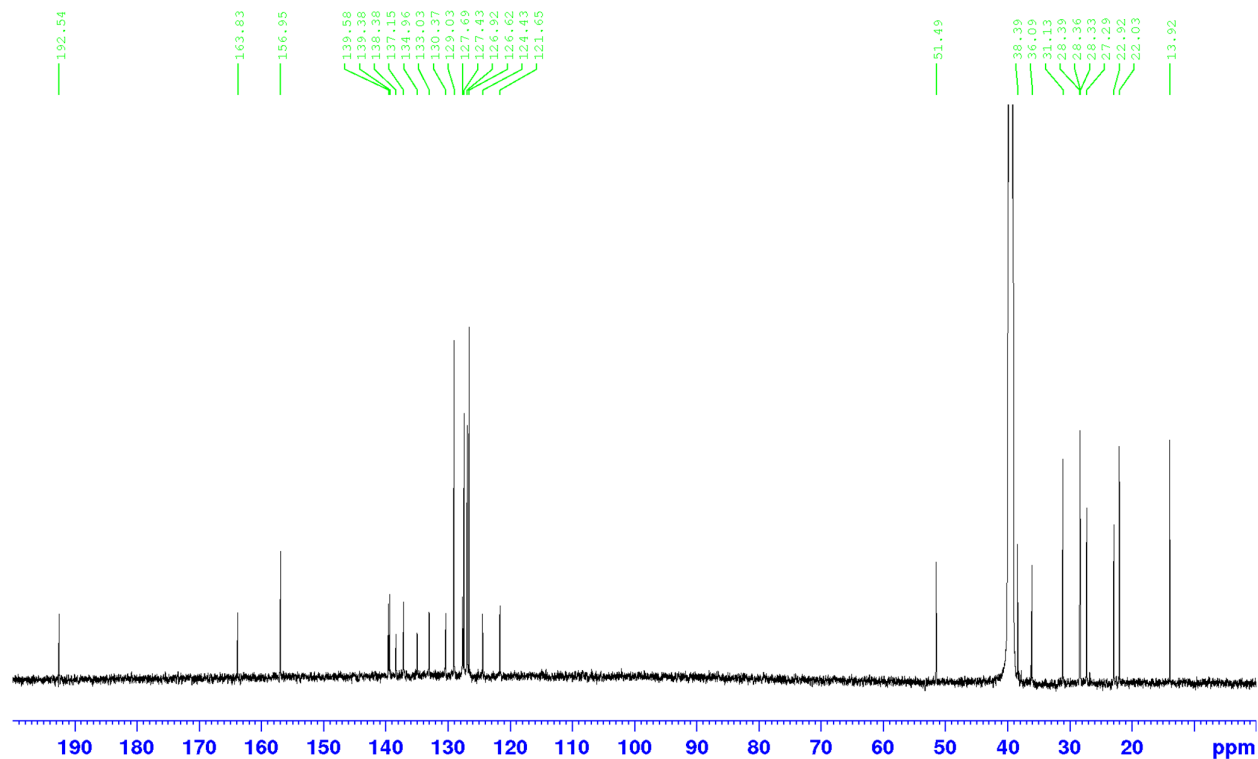

2-(2-(Dodecylsulfonamido)phenyl)-*N*-(3-guanidinopropyl)-2-oxoacetamide hydrochloride (**34a**)

<sup>1</sup>H NMR (600 MHz, DMSO-*d*<sub>6</sub>):

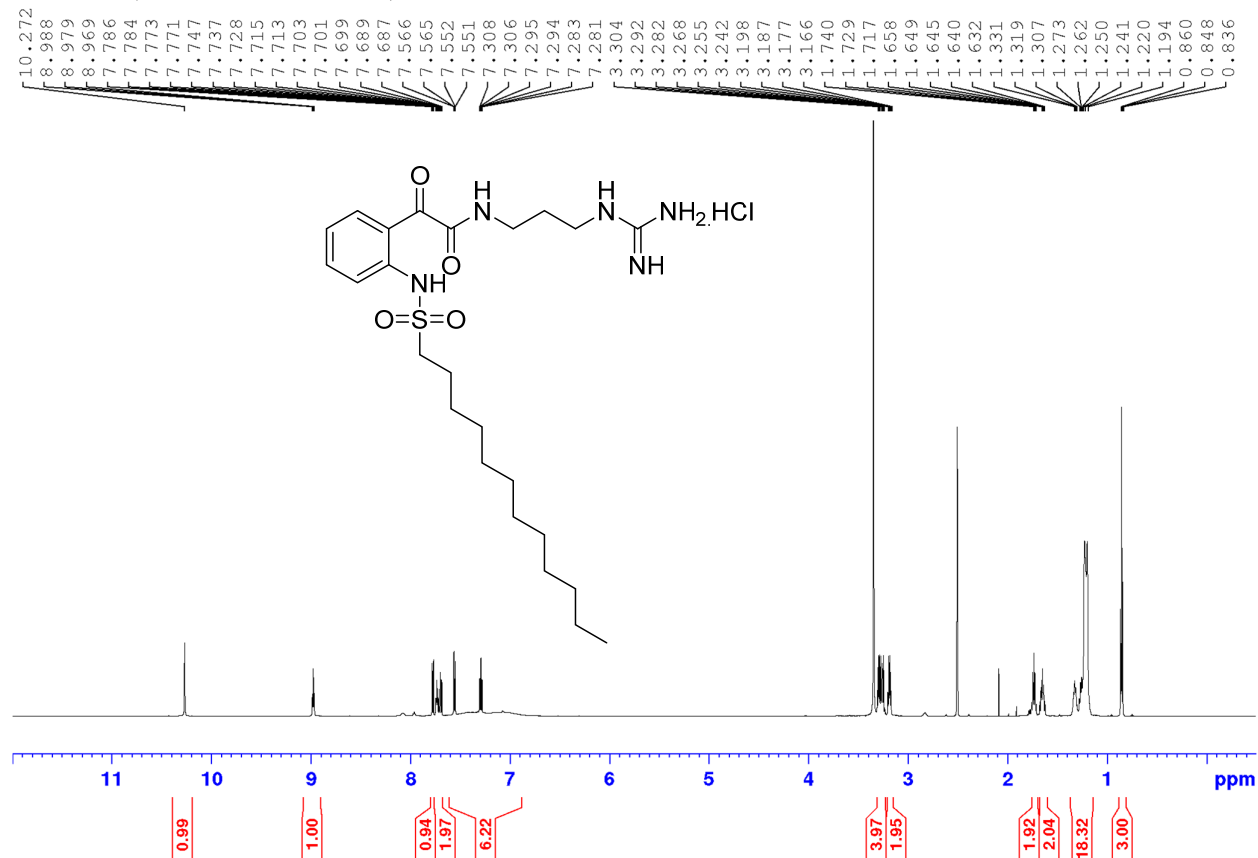

<sup>13</sup>C NMR (150 MHz, DMSO-*d*<sub>6</sub>):

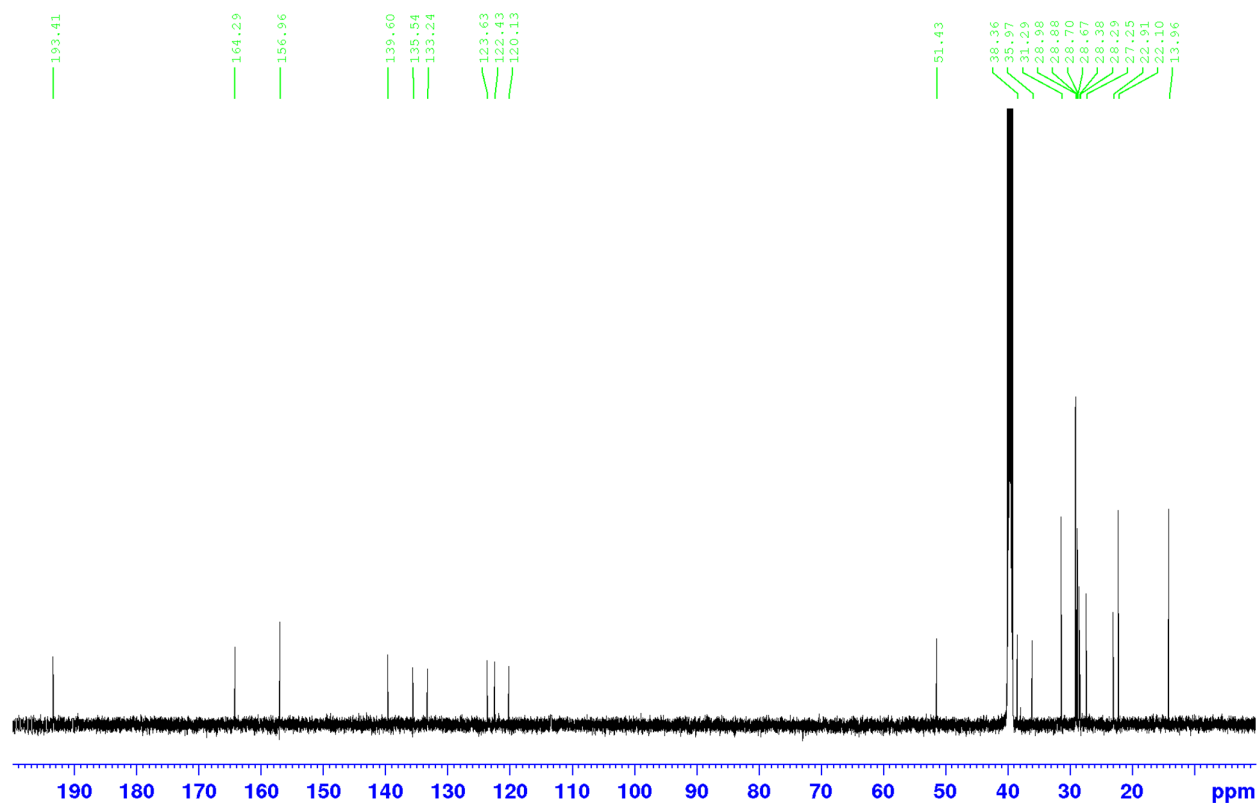

2-(5-Bromo-2-(dodecylsulfonamido)phenyl)-*N*-(3-guanidinopropyl)-2-oxoacetamide hydrochloride  
(**34b**)

$^1\text{H}$  NMR (600 MHz,  $\text{DMSO}-d_6$ ):

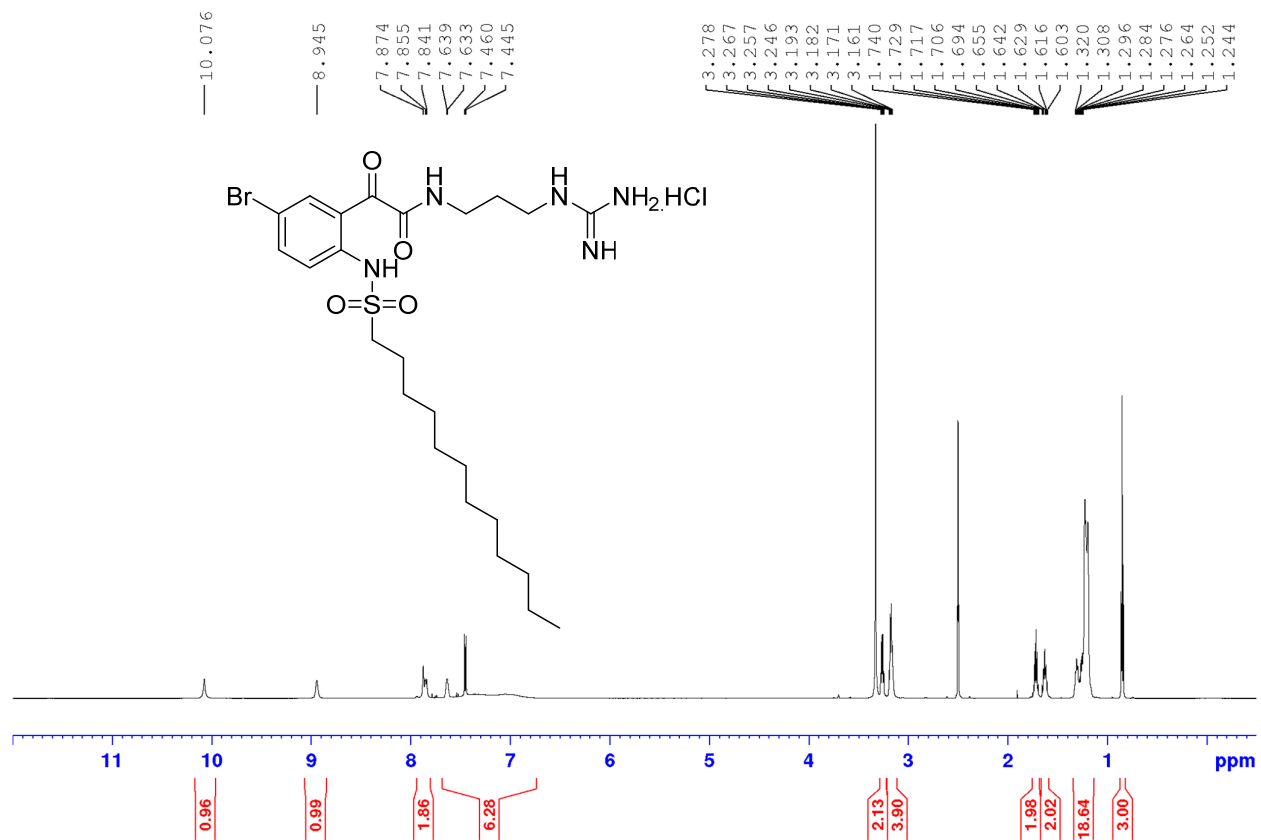

$^{13}\text{C}$  NMR (150 MHz,  $\text{DMSO}-d_6$ ):

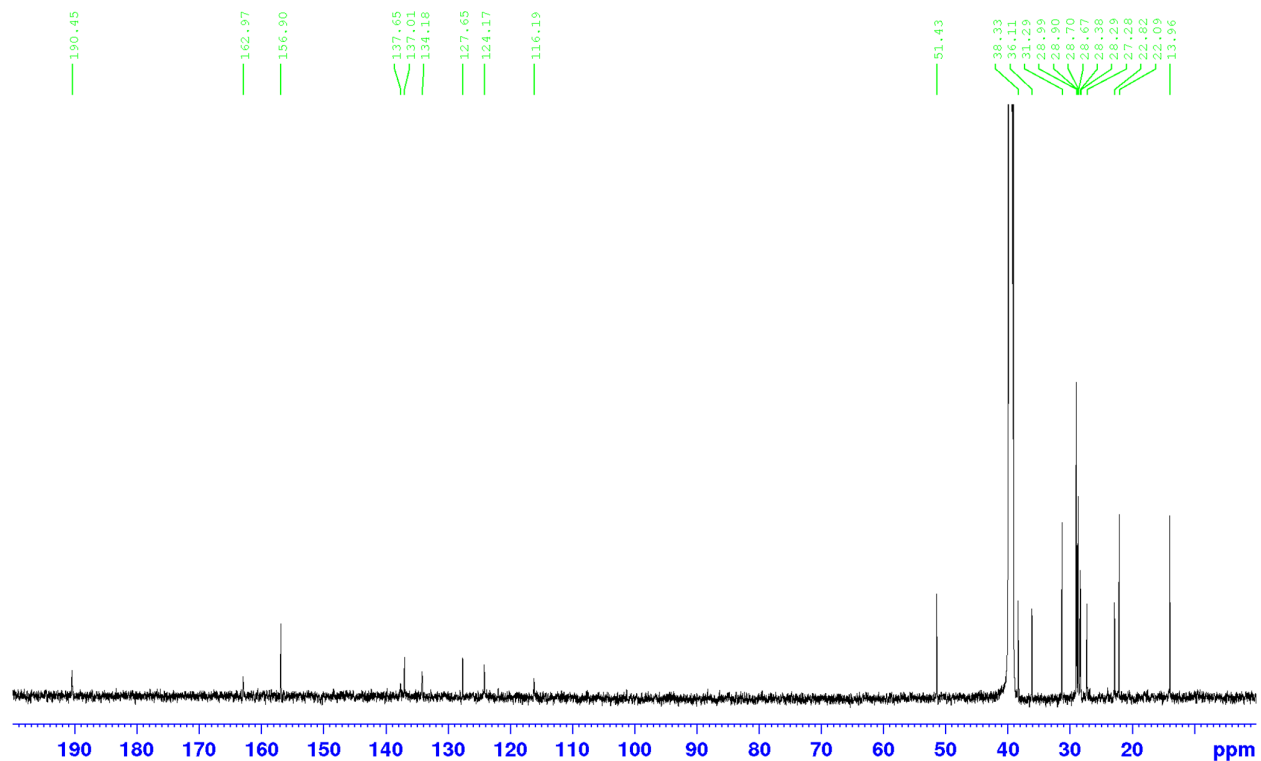

2-(4-(Dodecylsulfonamido)-[1,1'-biphenyl]-3-yl)-N-(3-guanidinopropyl)-2-oxoacetamide  
hydrochloride (**34c**)

$^1\text{H}$  NMR (600 MHz,  $\text{DMSO}-d_6$ ):

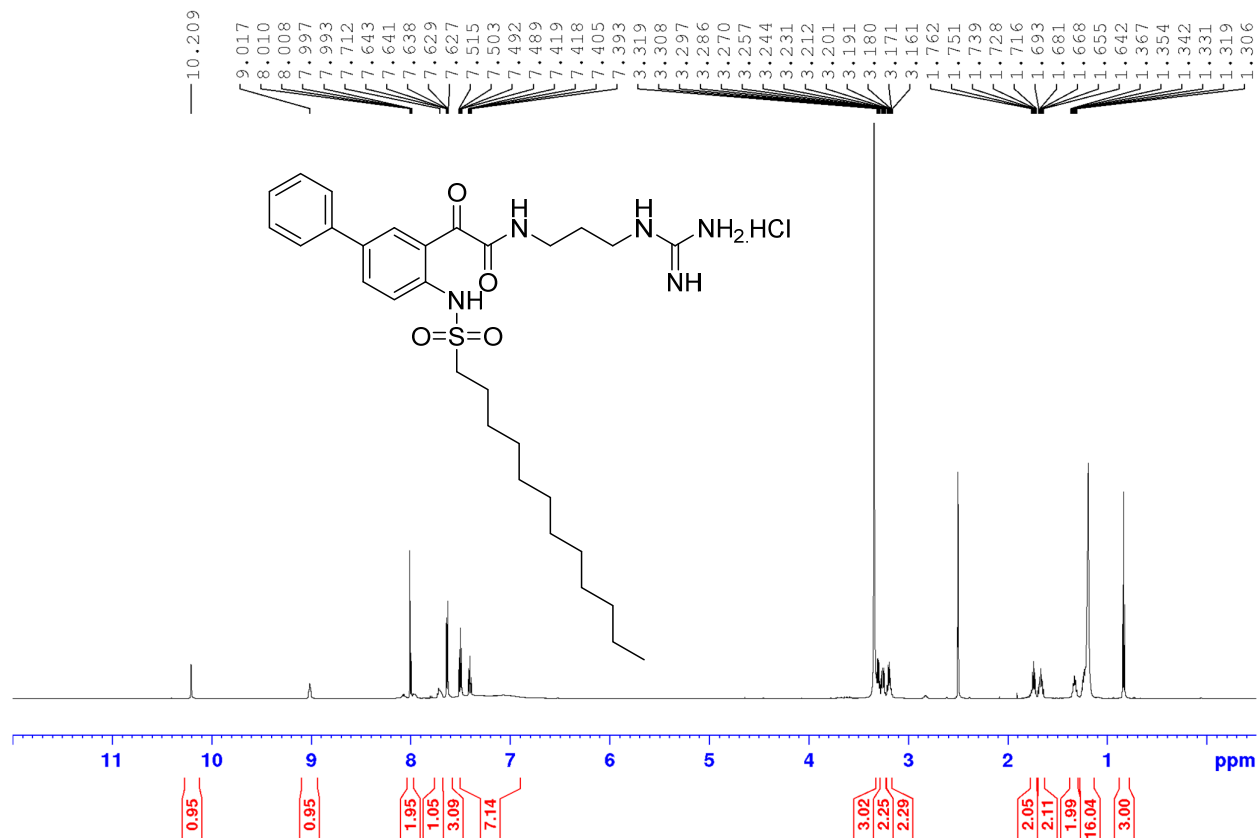

$^{13}\text{C}$  NMR (150 MHz,  $\text{DMSO}-d_6$ ):

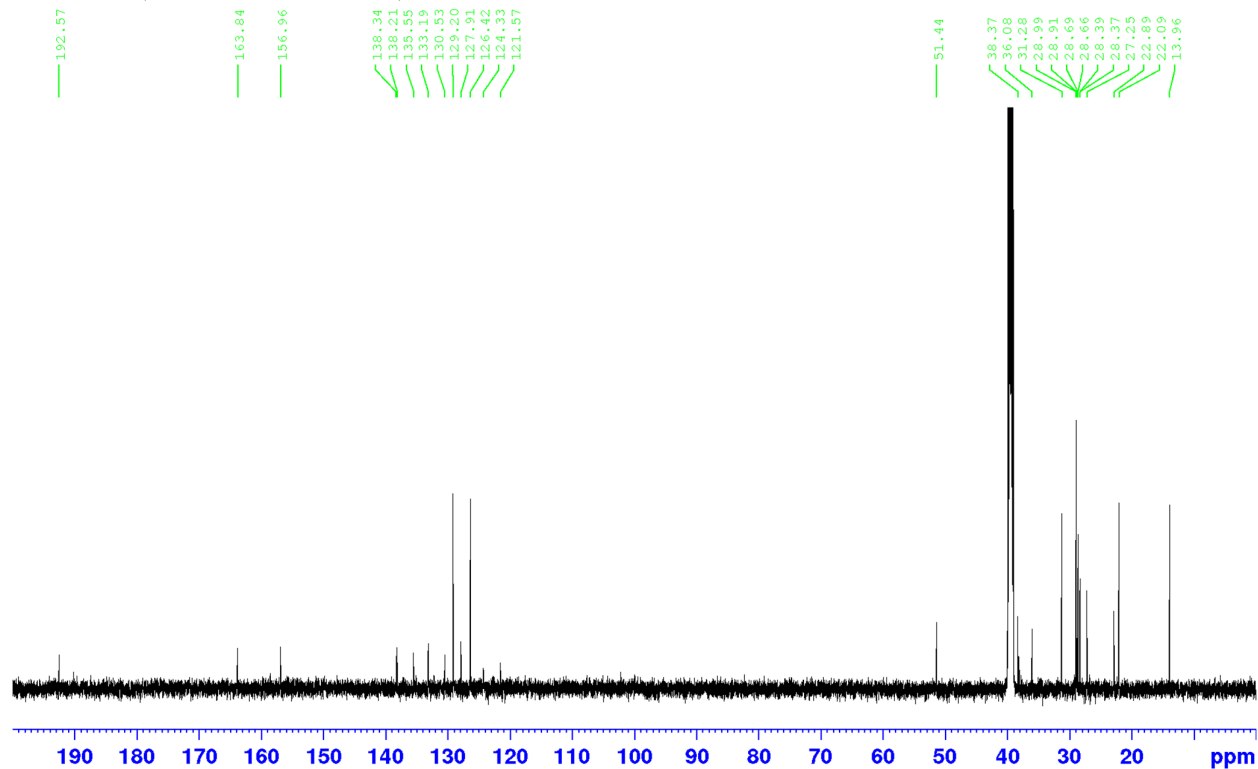

<sup>1</sup>H NMR (600 MHz, DMSO-*d*<sub>6</sub>):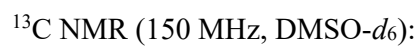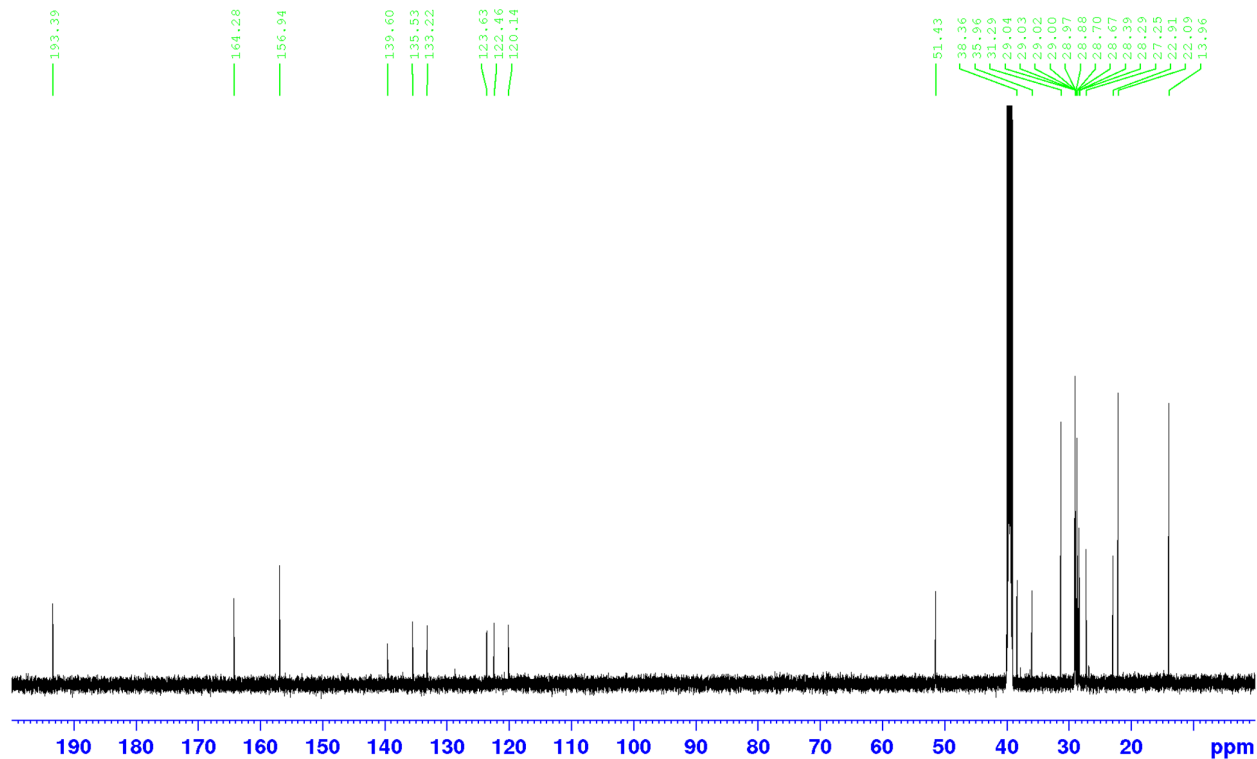



2-(5-Bromo-2-(hexadecylsulfonamido)phenyl)-*N*-(3-guanidinopropyl)-2-oxoacetamide hydrochloride  
(**35b**)

$^1\text{H}$  NMR (400 MHz, DMSO- $d_6$ ):

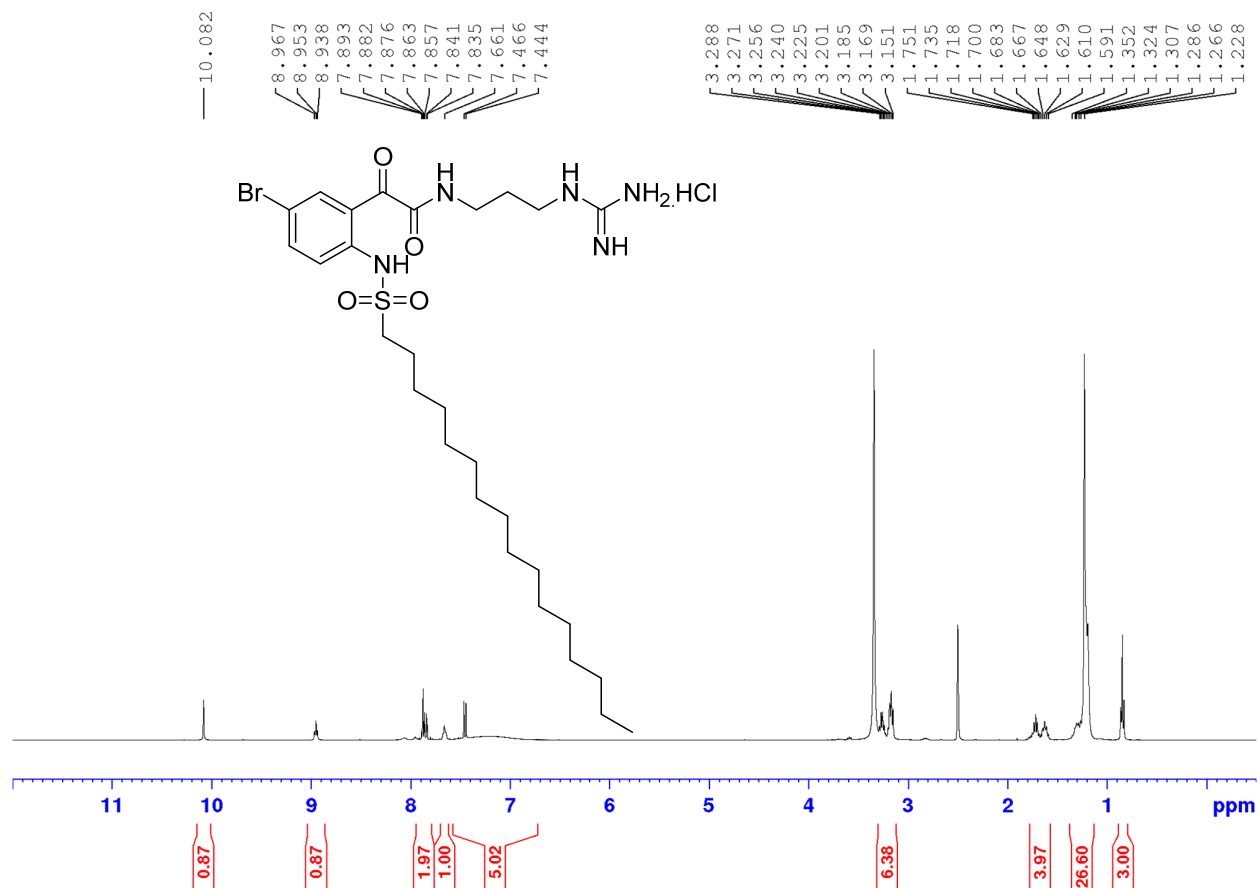

$^{13}\text{C}$  NMR (100 MHz, DMSO- $d_6$ ):

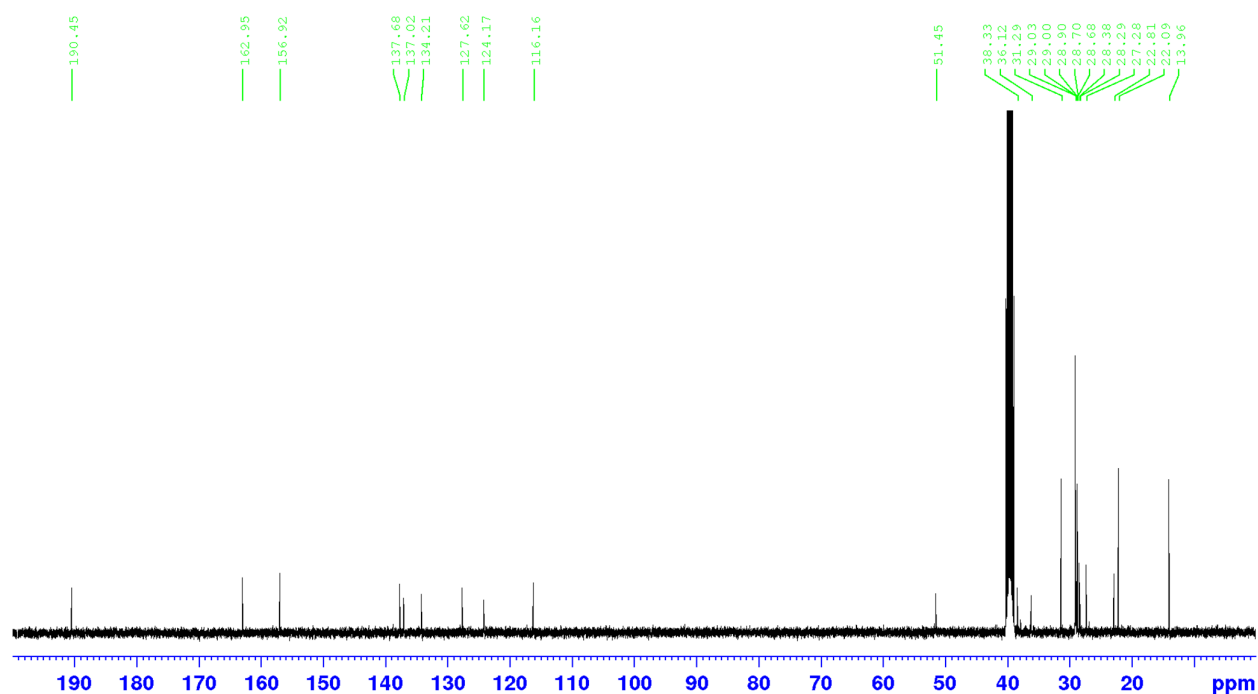

*N*-(3-Guanidinopropyl)-2-(4-(hexadecylsulfonamido)-[1,1'-biphenyl]-3-yl)-2-oxoacetamide hydrochloride (**35c**)

$^1\text{H}$  NMR (400 MHz,  $\text{DMSO}-d_6$ ):

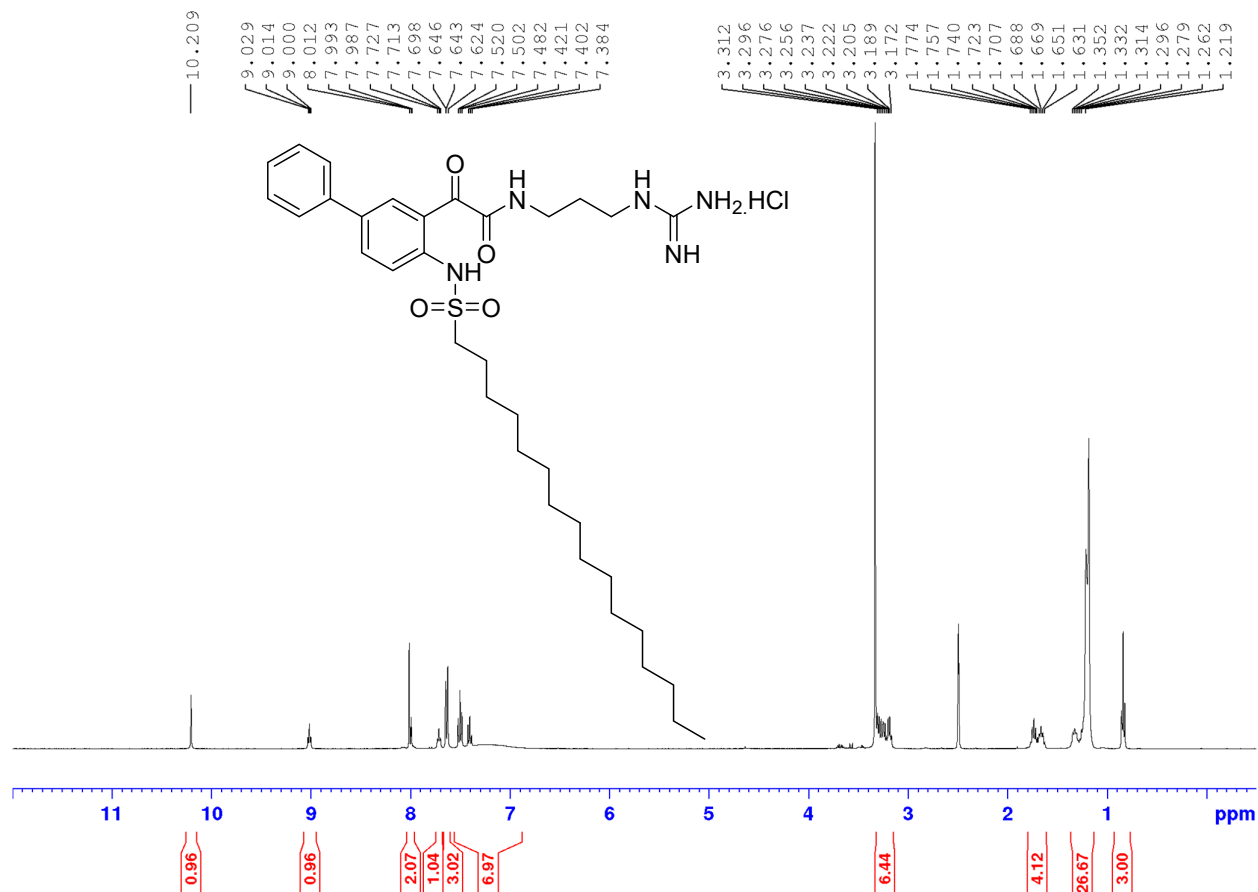

$^{13}\text{C}$  NMR (100 MHz,  $\text{DMSO}-d_6$ ):

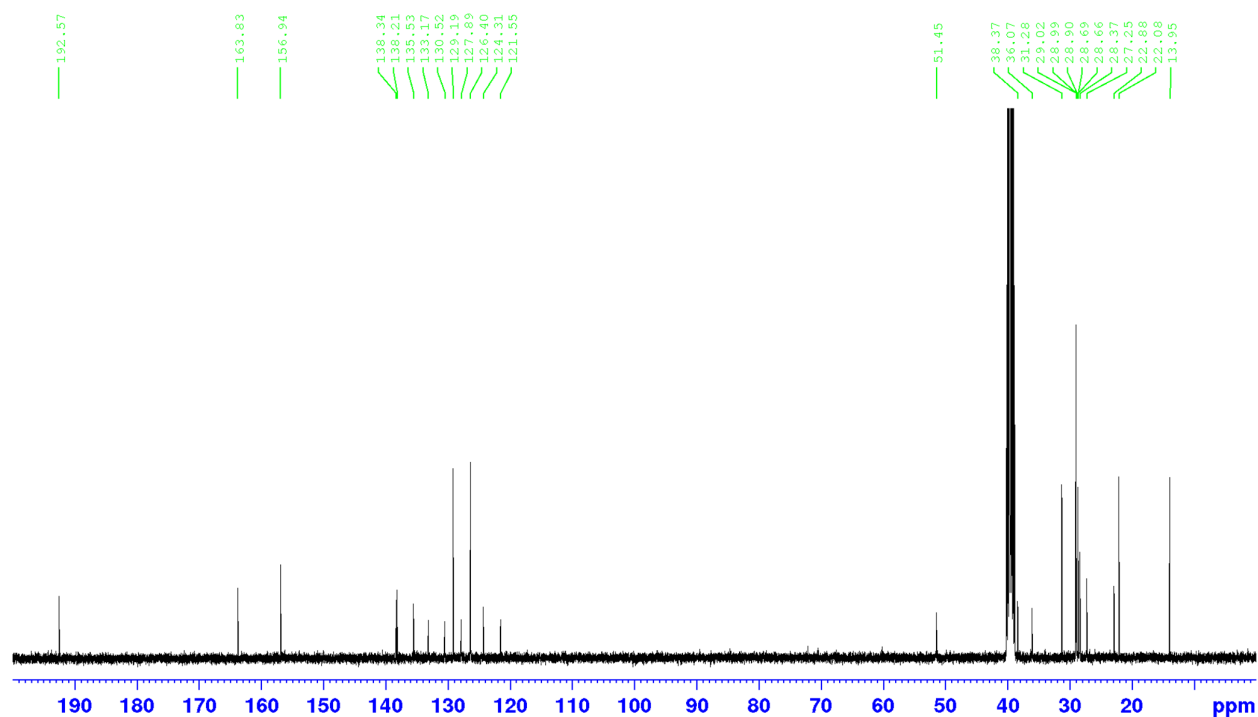

Supplement: s1 [file s1]
